# Supplementary material for: Diverse Functions Associate With Non-Coding Trans-species Polymorphisms in Humans
Source: Research Square preprint supplement (doi:10.21203/rs.3.rs-559297/v1), 2021-05-28
Supplement: Supplementary file 1 [file 08d310eb3e60ac7cf37ff78e.xlsx]

## Sheet: STable1
STable 1. SNPs associated with regulatory annotations from the Ensembl Regulatory Build
Region	RSID	TSP_SNP	TSP	Biotype
chr1_1	rs78742487	rs76483414,rs76718158	0	promoter_flanking_region
chr1_1	rs114457418	rs76483414,rs76718158	0	promoter_flanking_region
chr1_1	rs115719230	rs76483414,rs76718158	0	promoter_flanking_region
chr1_1	rs76626712	rs76483414,rs76718158	0	enhancer
chr1_1	rs76483414	rs76483414,rs76718158	1	enhancer
chr1_1	rs143024371	rs76483414,rs76718158	0	enhancer
chr1_1	rs114209134	rs76483414,rs76718158	0	enhancer
chr1_1	rs75609682	rs76483414,rs76718158	0	enhancer
chr1_1	rs79058992	rs76483414,rs76718158	0	open_chromatin_region
chr1_1	rs76118125	rs76483414,rs76718158	0	open_chromatin_region
chr1_1	rs75643150	rs76483414,rs76718158	0	open_chromatin_region
chr1_1	rs78271975	rs76483414,rs76718158	0	open_chromatin_region
chr1_1	rs28660451	rs76483414,rs76718158	0	open_chromatin_region
chr1_1	rs28632183	rs76483414,rs76718158	0	open_chromatin_region
chr1_1	rs28482172	rs76483414,rs76718158	0	open_chromatin_region
chr1_1	rs150453277	rs76483414,rs76718158	0	open_chromatin_region
chr1_1	rs28521686	rs76483414,rs76718158	0	open_chromatin_region
chr1_1	rs114416448	rs76483414,rs76718158	0	open_chromatin_region
chr1_1	rs28545392	rs76483414,rs76718158	0	open_chromatin_region
chr1_1	rs76750858	rs76483414,rs76718158	0	promoter_flanking_region
chr1_1	rs77362905	rs76483414,rs76718158	0	promoter_flanking_region
chr1_1	rs76446871	rs76483414,rs76718158	0	promoter_flanking_region
chr1_1	rs116394419	rs76483414,rs76718158	0	promoter_flanking_region
chr1_1	rs75644517	rs76483414,rs76718158	0	promoter_flanking_region
chr1_1	rs11801114	rs76483414,rs76718158	0	enhancer
chr1_1	rs116792955	rs76483414,rs76718158	0	enhancer
chr1_2	rs12128266	rs531066,rs6677026	0	enhancer
chr1_2	rs12128266	rs531066,rs6677026	0	CTCF_binding_site
chr1_2	rs12118822	rs531066,rs6677026	0	enhancer
chr1_2	rs11397947	rs531066,rs6677026	0	enhancer
chr1_2	rs7548494	rs531066,rs6677026	0	enhancer
chr1_2	rs61769940	rs531066,rs6677026	0	enhancer
chr1_2	rs56810021	rs531066,rs6677026	0	enhancer
chr1_2	rs531066	rs531066,rs6677026	1	enhancer
chr1_2	rs532016	rs531066,rs6677026	0	enhancer
chr1_2	rs502199	rs531066,rs6677026	0	open_chromatin_region
chr1_2	rs544234	rs531066,rs6677026	0	enhancer
chr1_2	rs59738400	rs531066,rs6677026	0	enhancer
chr1_3	rs11209813	rs11209813;rs2422014	1	open_chromatin_region
chr1_3	rs2422014	rs11209813;rs2422014	1	open_chromatin_region
chr1_4	rs16839014	rs16839017,rs55801926	0	promoter_flanking_region
chr1_4	rs113903182	rs16839017,rs55801926	0	promoter_flanking_region
chr1_4	rs74119641	rs16839017,rs55801926	0	promoter_flanking_region
chr1_4	rs74119641	rs16839017,rs55801926	0	CTCF_binding_site
chr1_4	rs74119642	rs16839017,rs55801926	0	promoter_flanking_region
chr1_4	rs2210919	rs16839017,rs55801926	0	promoter_flanking_region
chr1_4	rs9427307	rs16839017,rs55801926	0	promoter_flanking_region
chr1_4	rs16839020	rs16839017,rs55801926	0	enhancer
chr1_4	rs61321087	rs16839017,rs55801926	0	enhancer
chr1_4	rs16839024	rs16839017,rs55801926	0	enhancer
chr1_5	rs74124370	rs74124362,rs74124368	0	promoter_flanking_region
chr1_6	rs6701744	rs79870021,rs6670562	0	TF_binding_site
chr1_6	rs116213272	rs79870021,rs6670562	0	enhancer
chr1_6	rs144925103	rs79870021,rs6670562	0	promoter_flanking_region
chr1_6	rs79870021	rs79870021,rs6670562	1	promoter_flanking_region
chr1_6	rs76095309	rs79870021,rs6670562	0	promoter_flanking_region
chr1_6	rs6670562	rs79870021,rs6670562	1	promoter_flanking_region
chr1_6	rs148386371	rs79870021,rs6670562	0	promoter_flanking_region
chr1_6	rs78218236	rs79870021,rs6670562	0	promoter_flanking_region
chr1_7	rs6696979	rs74141214,rs74141215	0	CTCF_binding_site
chr1_7	rs6657330	rs74141214,rs74141215	0	CTCF_binding_site
chr1_7	rs6682598	rs74141214,rs74141215	0	CTCF_binding_site
chr1_7	rs6661017	rs74141214,rs74141215	0	promoter
chr1_7	rs74141214	rs74141214,rs74141215	1	promoter
chr1_7	rs74141214	rs74141214,rs74141215	1	CTCF_binding_site
chr1_7	rs34785653	rs74141214,rs74141215	0	promoter
chr1_7	rs74141215	rs74141214,rs74141215	1	CTCF_binding_site
chr1_7	rs74877853	rs74141214,rs74141215	0	CTCF_binding_site
chr2_9	rs1468780	rs11681155,rs11888584	0	promoter_flanking_region
chr2_9	rs76042374	rs11681155,rs11888584	0	promoter_flanking_region
chr2_9	rs55785202	rs11681155,rs11888584	0	promoter_flanking_region
chr2_9	rs59710729	rs11681155,rs11888584	0	CTCF_binding_site
chr2_9	rs16856020	rs11681155,rs11888584	0	CTCF_binding_site
chr2_9	rs11677554	rs11681155,rs11888584	0	promoter_flanking_region
chr2_9	rs7576926	rs11681155,rs11888584	0	promoter_flanking_region
chr2_9	rs56306950	rs11681155,rs11888584	0	promoter_flanking_region
chr2_9	rs73914014	rs11681155,rs11888584	0	promoter_flanking_region
chr2_9	rs7580449	rs11681155,rs11888584	0	CTCF_binding_site
chr2_9	rs7580449	rs11681155,rs11888584	0	promoter_flanking_region
chr2_9	rs7583344	rs11681155,rs11888584	0	CTCF_binding_site
chr2_9	rs7583344	rs11681155,rs11888584	0	promoter_flanking_region
chr2_9	rs1468781	rs11681155,rs11888584	0	CTCF_binding_site
chr2_9	rs1468781	rs11681155,rs11888584	0	promoter_flanking_region
chr2_9	rs1468782	rs11681155,rs11888584	0	CTCF_binding_site
chr2_9	rs1468782	rs11681155,rs11888584	0	promoter_flanking_region
chr2_9	rs17379489	rs11681155,rs11888584	0	promoter_flanking_region
chr2_9	rs11695911	rs11681155,rs11888584	0	promoter_flanking_region
chr2_9	rs11690100	rs11681155,rs11888584	0	promoter_flanking_region
chr2_10	rs59647975	rs2160947,rs114431418	0	CTCF_binding_site
chr2_10	rs872241	rs2160947,rs114431418	0	CTCF_binding_site
chr2_10	rs13414949	rs2160947,rs114431418	0	CTCF_binding_site
chr2_10	rs10178664	rs2160947,rs114431418	0	promoter_flanking_region
chr2_10	rs6713860	rs2160947,rs114431418	0	promoter_flanking_region
chr2_10	rs11676644	rs2160947,rs114431418	0	promoter_flanking_region
chr2_10	rs11676689	rs2160947,rs114431418	0	promoter_flanking_region
chr2_11	rs78410209	rs11126199,rs78410209	1	promoter_flanking_region
chr2_13	rs1430271	rs2163254,rs12477109	0	CTCF_binding_site
chr2_13	rs72838938	rs2163254,rs12477109	0	promoter_flanking_region
chr2_13	rs36000677	rs2163254,rs12477109	0	promoter_flanking_region
chr2_13	rs1346804	rs2163254,rs12477109	0	promoter_flanking_region
chr2_13	rs985698	rs2163254,rs12477109	0	CTCF_binding_site
chr2_13	rs62149011	rs2163254,rs12477109	0	CTCF_binding_site
chr2_13	rs36099386	rs2163254,rs12477109	0	CTCF_binding_site
chr2_13	rs36099386	rs2163254,rs12477109	0	enhancer
chr2_13	rs9636448	rs2163254,rs12477109	0	enhancer
chr2_13	rs12470491	rs2163254,rs12477109	0	enhancer
chr2_14	rs72979501	rs58921591,rs72981523	0	promoter_flanking_region
chr2_14	rs112788425	rs58921591,rs72981523	0	promoter_flanking_region
chr2_14	rs72981508	rs58921591,rs72981523	0	promoter_flanking_region
chr2_14	rs56725530	rs58921591,rs72981523	0	promoter_flanking_region
chr2_14	rs58921591	rs58921591,rs72981523	1	promoter_flanking_region
chr2_14	rs61553020	rs58921591,rs72981523	0	promoter_flanking_region
chr2_14	rs61169137	rs58921591,rs72981523	0	promoter_flanking_region
chr2_14	rs61258554	rs58921591,rs72981523	0	promoter_flanking_region
chr2_14	rs57602679	rs58921591,rs72981523	0	promoter_flanking_region
chr2_14	rs72981523	rs58921591,rs72981523	1	promoter_flanking_region
chr2_15	rs11434381	rs1214090,rs1119384	0	enhancer
chr2_15	rs1214125	rs1214090,rs1119384	0	promoter_flanking_region
chr2_15	rs1214078	rs1214090,rs1119384	0	open_chromatin_region
chr2_15	rs17010669	rs1214090,rs1119384	0	open_chromatin_region
chr2_15	rs140435710	rs1214090,rs1119384	0	enhancer
chr2_15	rs2674921	rs1214090,rs1119384	0	promoter_flanking_region
chr2_15	rs2674922	rs1214090,rs1119384	0	promoter_flanking_region
chr2_16	rs114879027	rs186616630,rs116749082	0	open_chromatin_region
chr2_16	rs114963295	rs186616630,rs116749082	0	enhancer
chr2_16	rs190523759	rs186616630,rs116749082	0	CTCF_binding_site
chr2_16	rs12105469	rs186616630,rs116749082	0	promoter_flanking_region
chr2_17	rs7562394	rs59901332,rs10196543	0	promoter_flanking_region
chr2_17	rs11695825	rs59901332,rs10196543	0	enhancer
chr2_17	rs7603248	rs59901332,rs10196543	0	enhancer
chr2_17	rs7576736	rs59901332,rs10196543	0	enhancer
chr2_17	rs4667975	rs59901332,rs10196543	0	enhancer
chr2_17	rs4667976	rs59901332,rs10196543	0	enhancer
chr2_18	rs7587930	rs13426764,rs11694806	0	open_chromatin_region
chr2_18	rs7562655	rs13426764,rs11694806	0	CTCF_binding_site
chr2_18	rs7601948	rs13426764,rs11694806	0	CTCF_binding_site
chr2_18	rs7592562	rs13426764,rs11694806	0	CTCF_binding_site
chr2_18	rs9973442	rs13426764,rs11694806	0	CTCF_binding_site
chr2_18	rs17229285	rs13426764,rs11694806	0	CTCF_binding_site
chr2_18	rs17826222	rs13426764,rs11694806	0	enhancer
chr2_18	rs13410413	rs13426764,rs11694806	0	enhancer
chr2_19	rs79064749	rs73988544,rs6745832	0	open_chromatin_region
chr2_19	rs17364024	rs73988544,rs6745832	0	promoter
chr2_19	rs79500785	rs73988544,rs6745832	0	CTCF_binding_site
chr2_19	rs73987980	rs73988544,rs6745832	0	CTCF_binding_site
chr2_19	rs144101052	rs73988544,rs6745832	0	promoter_flanking_region
chr2_19	rs111408125	rs73988544,rs6745832	0	promoter_flanking_region
chr2_19	rs74794311	rs73988544,rs6745832	0	open_chromatin_region
chr2_19	rs73986851	rs73988544,rs6745832	0	CTCF_binding_site
chr2_19	rs73986851	rs73988544,rs6745832	0	promoter_flanking_region
chr2_19	rs79504248	rs73988544,rs6745832	0	CTCF_binding_site
chr2_19	rs79504248	rs73988544,rs6745832	0	promoter_flanking_region
chr2_19	rs115822680	rs73988544,rs6745832	0	promoter_flanking_region
chr2_19	rs2161821	rs73988544,rs6745832	0	promoter_flanking_region
chr2_19	rs73986872	rs73988544,rs6745832	0	promoter_flanking_region
chr2_19	rs2008939	rs73988544,rs6745832	0	promoter_flanking_region
chr2_19	rs1813393	rs73988544,rs6745832	0	enhancer
chr2_19	rs1813393	rs73988544,rs6745832	0	CTCF_binding_site
chr2_19	rs61752199	rs73988544,rs6745832	0	CTCF_binding_site
chr2_19	rs59750241	rs73988544,rs6745832	0	CTCF_binding_site
chr2_19	rs58694237	rs73988544,rs6745832	0	CTCF_binding_site
chr2_19	rs78801086	rs73988544,rs6745832	0	promoter_flanking_region
chr2_19	rs116280569	rs73988544,rs6745832	0	promoter_flanking_region
chr2_19	rs77983884	rs73988544,rs6745832	0	promoter_flanking_region
chr2_19	rs16850450	rs73988544,rs6745832	0	promoter_flanking_region
chr2_19	rs143406246	rs73988544,rs6745832	0	promoter_flanking_region
chr2_19	rs116603970	rs73988544,rs6745832	0	enhancer
chr2_20	rs10498104	rs7607367,rs11886107	0	promoter_flanking_region
chr2_20	rs1432254	rs7607367,rs11886107	0	promoter_flanking_region
chr2_20	rs10170506	rs7607367,rs11886107	0	promoter_flanking_region
chr2_20	rs13423224	rs7607367,rs11886107	0	promoter_flanking_region
chr2_20	rs1432261	rs7607367,rs11886107	0	CTCF_binding_site
chr2_21	rs149571637	rs74571727,rs7609173	0	CTCF_binding_site
chr2_21	rs79026534	rs74571727,rs7609173	0	enhancer
chr2_21	rs76488741	rs74571727,rs7609173	0	enhancer
chr2_21	rs6431480	rs74571727,rs7609173	0	CTCF_binding_site
chr2_21	rs60019402	rs74571727,rs7609173	0	promoter_flanking_region
chr2_21	rs7606770	rs74571727,rs7609173	0	promoter_flanking_region
chr2_21	rs13420397	rs74571727,rs7609173	0	enhancer
chr2_21	rs13420397	rs74571727,rs7609173	0	CTCF_binding_site
chr2_21	rs118005986	rs74571727,rs7609173	0	CTCF_binding_site
chr2_21	rs35822026	rs74571727,rs7609173	0	enhancer
chr2_21	rs113962993	rs74571727,rs7609173	0	enhancer
chr2_21	rs76645992	rs74571727,rs7609173	0	enhancer
chr2_21	rs79899748	rs74571727,rs7609173	0	enhancer
chr2_22	rs7592376	rs10166264,rs59043333,rs72994757	0	open_chromatin_region
chr2_22	rs56333302	rs10166264,rs59043333,rs72994757	0	CTCF_binding_site
chr2_22	rs55962823	rs10166264,rs59043333,rs72994757	0	CTCF_binding_site
chr2_22	rs56048712	rs10166264,rs59043333,rs72994757	0	CTCF_binding_site
chr2_22	rs55682133	rs10166264,rs59043333,rs72994757	0	CTCF_binding_site
chr2_22	rs66689618	rs10166264,rs59043333,rs72994757	0	CTCF_binding_site
chr2_22	rs66478946	rs10166264,rs59043333,rs72994757	0	CTCF_binding_site
chr2_22	rs62184671	rs10166264,rs59043333,rs72994757	0	CTCF_binding_site
chr2_22	rs74002414	rs10166264,rs59043333,rs72994757	0	CTCF_binding_site
chr2_22	rs67611898	rs10166264,rs59043333,rs72994757	0	CTCF_binding_site
chr2_22	rs62184672	rs10166264,rs59043333,rs72994757	0	CTCF_binding_site
chr2_22	rs59763573	rs10166264,rs59043333,rs72994757	0	enhancer
chr2_22	rs58463596	rs10166264,rs59043333,rs72994757	0	enhancer
chr2_22	rs59894862	rs10166264,rs59043333,rs72994757	0	enhancer
chr2_22	rs62184677	rs10166264,rs59043333,rs72994757	0	enhancer
chr2_22	rs11675699	rs10166264,rs59043333,rs72994757	0	enhancer
chr2_22	rs11677915	rs10166264,rs59043333,rs72994757	0	enhancer
chr2_22	rs7607961	rs10166264,rs59043333,rs72994757	0	enhancer
chr2_22	rs7585676	rs10166264,rs59043333,rs72994757	0	enhancer
chr2_22	rs7575274	rs10166264,rs59043333,rs72994757	0	enhancer
chr2_22	rs7575275	rs10166264,rs59043333,rs72994757	0	enhancer
chr2_22	rs10179561	rs10166264,rs59043333,rs72994757	0	CTCF_binding_site
chr2_22	rs6725520	rs10166264,rs59043333,rs72994757	0	CTCF_binding_site
chr2_22	rs6742504	rs10166264,rs59043333,rs72994757	0	CTCF_binding_site
chr2_22	rs6746001	rs10166264,rs59043333,rs72994757	0	CTCF_binding_site
chr2_22	rs6736900	rs10166264,rs59043333,rs72994757	0	CTCF_binding_site
chr2_22	rs62184678	rs10166264,rs59043333,rs72994757	0	open_chromatin_region
chr3_23	rs62236264	rs62236264,rs79691057	1	enhancer
chr3_23	rs62236264	rs62236264,rs79691057	1	CTCF_binding_site
chr3_23	rs79691057	rs62236264,rs79691057	1	enhancer
chr3_23	rs79691057	rs62236264,rs79691057	1	CTCF_binding_site
chr3_23	rs62236265	rs62236264,rs79691057	0	enhancer
chr3_23	rs62236265	rs62236264,rs79691057	0	CTCF_binding_site
chr3_24	rs76243897	rs1436251,rs9848513	0	enhancer
chr3_24	rs77309070	rs1436251,rs9848513	0	enhancer
chr3_24	rs17588596	rs1436251,rs9848513	0	promoter_flanking_region
chr3_25	rs4678851	rs13078784,rs79152277	0	open_chromatin_region
chr3_25	rs188641086	rs13078784,rs79152277	0	open_chromatin_region
chr3_25	rs193164265	rs13078784,rs79152277	0	open_chromatin_region
chr3_25	rs74568781	rs13078784,rs79152277	0	open_chromatin_region
chr3_25	rs2884850	rs13078784,rs79152277	0	open_chromatin_region
chr3_25	rs2359969	rs13078784,rs79152277	0	open_chromatin_region
chr3_25	rs2359970	rs13078784,rs79152277	0	open_chromatin_region
chr3_25	rs2359972	rs13078784,rs79152277	0	open_chromatin_region
chr3_25	rs2359973	rs13078784,rs79152277	0	open_chromatin_region
chr3_25	rs34039253	rs13078784,rs79152277	0	open_chromatin_region
chr3_25	rs6763672	rs13078784,rs79152277	0	enhancer
chr3_25	rs6776529	rs13078784,rs79152277	0	enhancer
chr3_25	rs74331222	rs13078784,rs79152277	0	enhancer
chr3_25	rs76181324	rs13078784,rs79152277	0	enhancer
chr3_25	rs78462038	rs13078784,rs79152277	0	enhancer
chr3_25	rs76675470	rs13078784,rs79152277	0	enhancer
chr3_25	rs147902680	rs13078784,rs79152277	0	enhancer
chr3_25	rs79207404	rs13078784,rs79152277	0	CTCF_binding_site
chr3_25	rs79727638	rs13078784,rs79152277	0	promoter_flanking_region
chr3_25	rs77287438	rs13078784,rs79152277	0	promoter_flanking_region
chr3_25	rs78308914	rs13078784,rs79152277	0	promoter_flanking_region
chr3_25	rs35787092	rs13078784,rs79152277	0	promoter_flanking_region
chr3_25	rs79989939	rs13078784,rs79152277	0	promoter_flanking_region
chr3_25	rs75076021	rs13078784,rs79152277	0	promoter_flanking_region
chr3_25	rs75867335	rs13078784,rs79152277	0	promoter_flanking_region
chr3_25	rs76645709	rs13078784,rs79152277	0	promoter_flanking_region
chr3_25	rs13098317	rs13078784,rs79152277	0	promoter_flanking_region
chr3_25	rs74918224	rs13078784,rs79152277	0	promoter_flanking_region
chr3_25	rs11925214	rs13078784,rs79152277	0	promoter_flanking_region
chr3_25	rs75992473	rs13078784,rs79152277	0	promoter_flanking_region
chr3_25	rs11925993	rs13078784,rs79152277	0	promoter_flanking_region
chr3_25	rs11925994	rs13078784,rs79152277	0	promoter_flanking_region
chr3_25	rs34223664	rs13078784,rs79152277	0	promoter_flanking_region
chr3_25	rs1868596	rs13078784,rs79152277	0	promoter_flanking_region
chr3_25	rs74789786	rs13078784,rs79152277	0	promoter_flanking_region
chr3_25	rs1868597	rs13078784,rs79152277	0	promoter_flanking_region
chr3_25	rs78492885	rs13078784,rs79152277	0	enhancer
chr3_25	rs7629613	rs13078784,rs79152277	0	enhancer
chr3_25	rs7641114	rs13078784,rs79152277	0	enhancer
chr3_25	rs4435578	rs13078784,rs79152277	0	enhancer
chr3_25	rs1901029	rs13078784,rs79152277	0	enhancer
chr3_25	rs75475346	rs13078784,rs79152277	0	enhancer
chr3_25	rs79952754	rs13078784,rs79152277	0	enhancer
chr3_25	rs1450012	rs13078784,rs79152277	0	enhancer
chr3_25	rs80018291	rs13078784,rs79152277	0	enhancer
chr3_25	rs76949678	rs13078784,rs79152277	0	enhancer
chr3_25	rs75964315	rs13078784,rs79152277	0	enhancer
chr3_25	rs78649752	rs13078784,rs79152277	0	CTCF_binding_site
chr3_25	rs112525366	rs13078784,rs79152277	0	open_chromatin_region
chr3_25	rs149689838	rs13078784,rs79152277	0	open_chromatin_region
chr3_25	rs112041008	rs13078784,rs79152277	0	open_chromatin_region
chr3_25	rs79051597	rs13078784,rs79152277	0	open_chromatin_region
chr3_25	rs77342447	rs13078784,rs79152277	0	open_chromatin_region
chr3_25	rs74565511	rs13078784,rs79152277	0	open_chromatin_region
chr3_25	rs75149233	rs13078784,rs79152277	0	open_chromatin_region
chr3_25	rs74703614	rs13078784,rs79152277	0	enhancer
chr3_25	rs17034590	rs13078784,rs79152277	0	promoter_flanking_region
chr3_25	rs79617714	rs13078784,rs79152277	0	promoter_flanking_region
chr3_25	rs77485632	rs13078784,rs79152277	0	enhancer
chr3_25	rs10510681	rs13078784,rs79152277	0	open_chromatin_region
chr3_25	rs79714386	rs13078784,rs79152277	0	open_chromatin_region
chr3_25	rs73830921	rs13078784,rs79152277	0	open_chromatin_region
chr3_25	rs7639436	rs13078784,rs79152277	0	enhancer
chr3_26	rs17031796	rs76493021,rs4374476	0	promoter_flanking_region
chr3_26	rs61088656	rs76493021,rs4374476	0	promoter_flanking_region
chr3_26	rs60581715	rs76493021,rs4374476	0	promoter_flanking_region
chr3_26	rs17031798	rs76493021,rs4374476	0	promoter_flanking_region
chr3_26	rs76248203	rs4374476,rs76493021	0	open_chromatin_region
chr3_26	rs61006787	rs76493021,rs4374476	0	enhancer
chr3_26	rs1880525	rs76493021,rs4374476	0	enhancer
chr3_26	rs35666371	rs76493021,rs4374476	0	enhancer
chr3_26	rs9828928	rs76493021,rs4374476	0	enhancer
chr3_26	rs9809287	rs76493021,rs4374476	0	enhancer
chr3_26	rs9813068	rs76493021,rs4374476	0	enhancer
chr3_28	rs9821242	rs9869178,rs2118072	0	promoter_flanking_region
chr3_28	rs6766439	rs9869178,rs2118072	0	promoter_flanking_region
chr3_28	rs2361211	rs9869178,rs2118072	0	promoter_flanking_region
chr3_28	rs4350918	rs9869178,rs2118072	0	promoter_flanking_region
chr3_28	rs2134917	rs9869178,rs2118072	0	enhancer
chr3_28	rs2134918	rs9869178,rs2118072	0	enhancer
chr3_28	rs6440206	rs9869178,rs2118072	0	CTCF_binding_site
chr3_28	rs1504600	rs9869178,rs2118072	0	CTCF_binding_site
chr3_28	rs13083596	rs9869178,rs2118072	0	CTCF_binding_site
chr3_28	rs11710441	rs9869178,rs2118072	0	CTCF_binding_site
chr3_28	rs1504601	rs9869178,rs2118072	0	CTCF_binding_site
chr3_28	rs1394401	rs9869178,rs2118072	0	promoter_flanking_region
chr3_28	rs2217926	rs9869178,rs2118072	0	promoter_flanking_region
chr3_28	rs2217926	rs9869178,rs2118072	0	CTCF_binding_site
chr3_28	rs7626898	rs9869178,rs2118072	0	promoter_flanking_region
chr3_28	rs7626898	rs9869178,rs2118072	0	CTCF_binding_site
chr3_28	rs1370029	rs9869178,rs2118072	0	open_chromatin_region
chr3_28	rs34052489	rs9869178,rs2118072	0	enhancer
chr3_28	rs4334641	rs9869178,rs2118072	0	enhancer
chr3_28	rs2370175	rs9869178,rs2118072	0	enhancer
chr3_28	rs7432451	rs9869178,rs2118072	0	enhancer
chr3_28	rs7426399	rs9869178,rs2118072	0	enhancer
chr3_28	rs9867025	rs9869178,rs2118072	0	enhancer
chr3_28	rs9811736	rs9869178,rs2118072	0	enhancer
chr3_28	rs9811888	rs9869178,rs2118072	0	enhancer
chr3_28	rs9867615	rs9869178,rs2118072	0	enhancer
chr3_28	rs9869178	rs9869178,rs2118072	1	enhancer
chr3_28	rs17603166	rs9869178,rs2118072	0	enhancer
chr3_28	rs2221411	rs9869178,rs2118072	0	enhancer
chr3_28	rs1992094	rs9869178,rs2118072	0	promoter
chr3_28	rs7653431	rs9869178,rs2118072	0	promoter
chr3_28	rs1898263	rs9869178,rs2118072	0	promoter
chr3_28	rs4431106	rs9869178,rs2118072	0	promoter
chr3_28	rs7631704	rs9869178,rs2118072	0	promoter
chr3_28	rs7651567	rs9869178,rs2118072	0	promoter
chr3_28	rs11720540	rs9869178,rs2118072	0	promoter
chr3_28	rs6767811	rs9869178,rs2118072	0	promoter
chr3_28	rs6767811	rs9869178,rs2118072	0	CTCF_binding_site
chr3_28	rs9683376	rs9869178,rs2118072	0	promoter_flanking_region
chr3_28	rs1469871	rs9869178,rs2118072	0	promoter_flanking_region
chr3_28	rs6770317	rs9869178,rs2118072	0	enhancer
chr3_29	rs1532604	rs9880740,rs35592194	0	promoter_flanking_region
chr3_29	rs12696446	rs9880740,rs35592194	0	promoter_flanking_region
chr3_29	rs9871317	rs9880740,rs35592194	0	promoter_flanking_region
chr3_29	rs4857717	rs9880740,rs35592194	0	promoter_flanking_region
chr3_29	rs6804861	rs9880740,rs35592194	0	promoter_flanking_region
chr3_29	rs937506	rs9880740,rs35592194	0	promoter_flanking_region
chr3_29	rs2014126	rs9880740,rs35592194	0	promoter_flanking_region
chr3_29	rs13083260	rs9880740,rs35592194	0	CTCF_binding_site
chr3_29	rs13083260	rs9880740,rs35592194	0	promoter_flanking_region
chr3_29	rs13060978	rs9880740,rs35592194	0	CTCF_binding_site
chr3_29	rs13060978	rs9880740,rs35592194	0	promoter_flanking_region
chr3_29	rs16828300	rs9880740,rs35592194	0	promoter_flanking_region
chr3_29	rs12630655	rs9880740,rs35592194	0	promoter_flanking_region
chr3_29	rs71626275	rs9880740,rs35592194	0	promoter_flanking_region
chr3_29	rs10936950	rs9880740,rs35592194	0	promoter_flanking_region
chr3_29	rs35409148	rs9880740,rs35592194	0	promoter_flanking_region
chr3_29	rs12496456	rs9880740,rs35592194	0	promoter_flanking_region
chr3_29	rs1875101	rs9880740,rs35592194	0	enhancer
chr3_29	rs1875100	rs9880740,rs35592194	0	enhancer
chr3_29	rs4989456	rs9880740,rs35592194	0	enhancer
chr3_30	rs186577357	rs78617585,rs73043708	0	open_chromatin_region
chr3_30	rs79151666	rs78617585,rs73043708	0	enhancer
chr3_30	rs188025552	rs78617585,rs73043708	0	CTCF_binding_site
chr3_30	rs115818005	rs78617585,rs73043708	0	open_chromatin_region
chr3_30	rs78349256	rs78617585,rs73043708	0	promoter_flanking_region
chr4_31	rs114507112	rs73800212,rs2597758,rs6811303	0	CTCF_binding_site
chr4_31	rs114507112	rs73800212,rs2597758,rs6811303	0	promoter_flanking_region
chr4_31	rs17516753	rs73800212,rs2597758,rs6811303	0	CTCF_binding_site
chr4_31	rs17516753	rs73800212,rs2597758,rs6811303	0	promoter_flanking_region
chr4_31	rs12640237	rs73800212,rs2597758,rs6811303	0	CTCF_binding_site
chr4_31	rs115052643	rs73800212,rs2597758,rs6811303	0	CTCF_binding_site
chr4_31	rs2518630	rs73800212,rs2597758,rs6811303	0	enhancer
chr4_31	rs77936892	rs73800212,rs2597758,rs6811303	0	enhancer
chr4_31	rs77997575	rs73800212,rs2597758,rs6811303	0	promoter_flanking_region
chr4_31	rs11733530	rs73800212,rs2597758,rs6811303	0	promoter_flanking_region
chr4_31	rs114598155	rs73800212,rs2597758,rs6811303	0	promoter_flanking_region
chr4_31	rs16895143	rs73800212,rs2597758,rs6811303	0	open_chromatin_region
chr4_31	rs7660043	rs73800212,rs2597758,rs6811303	0	TF_binding_site
chr4_31	rs77694421	rs73800212,rs2597758,rs6811303	0	promoter_flanking_region
chr4_31	rs142182564	rs73800212,rs2597758,rs6811303	0	enhancer
chr4_31	rs12645938	rs73800212,rs2597758,rs6811303	0	open_chromatin_region
chr4_32	rs1032240	rs78157989,rs79740699	0	enhancer
chr4_33	rs2585962	rs2687419,rs78433814	0	open_chromatin_region
chr4_34	rs6831545	rs76223251,rs6554262	0	open_chromatin_region
chr4_34	rs6845589	rs76223251,rs6554262	0	enhancer
chr4_34	rs6830265	rs76223251,rs6554262	0	enhancer
chr4_34	rs11427030	rs76223251,rs6554262	0	enhancer
chr4_34	rs35119315	rs76223251,rs6554262	0	enhancer
chr4_34	rs6850709	rs76223251,rs6554262	0	CTCF_binding_site
chr4_34	rs112474532	rs76223251,rs6554262	0	CTCF_binding_site
chr4_34	rs76748267	rs76223251,rs6554262	0	CTCF_binding_site
chr4_34	rs112910860	rs76223251,rs6554262	0	CTCF_binding_site
chr4_34	rs112323765	rs76223251,rs6554262	0	CTCF_binding_site
chr4_34	rs116767880	rs76223251,rs6554262	0	promoter_flanking_region
chr4_34	rs116767880	rs76223251,rs6554262	0	CTCF_binding_site
chr4_36	rs34060938	rs13110858,rs1401188	0	promoter_flanking_region
chr4_36	rs35551730	rs13110858,rs1401188	0	promoter_flanking_region
chr4_35	rs1718881	rs1713972,rs1713971,rs1718879	0	promoter_flanking_region
chr4_35	rs1713975	rs1713972,rs1713971,rs1718879	0	promoter_flanking_region
chr4_35	rs1713974	rs1713972,rs1713971,rs1718879	0	promoter_flanking_region
chr4_35	rs1713973	rs1713972,rs1713971,rs1718879	0	promoter_flanking_region
chr4_35	rs1713972	rs1713972,rs1713971,rs1718879	1	promoter_flanking_region
chr4_35	rs1718880	rs1713972,rs1713971,rs1718879	0	promoter_flanking_region
chr4_35	rs1713971	rs1713972,rs1713971,rs1718879	1	promoter_flanking_region
chr4_35	rs1718879	rs1713972,rs1713971,rs1718879	1	promoter_flanking_region
chr4_36	rs17087436	rs13110858,rs1401188	0	promoter_flanking_region
chr4_36	rs35556281	rs13110858,rs1401188	0	promoter_flanking_region
chr4_36	rs35751300	rs13110858,rs1401188	0	promoter_flanking_region
chr4_36	rs35375436	rs13110858,rs1401188	0	promoter_flanking_region
chr4_36	rs34209153	rs13110858,rs1401188	0	promoter_flanking_region
chr4_36	rs35052757	rs13110858,rs1401188	0	promoter_flanking_region
chr4_36	rs35432885	rs13110858,rs1401188	0	promoter_flanking_region
chr4_36	rs35190777	rs13110858,rs1401188	0	promoter_flanking_region
chr4_36	rs35363729	rs13110858,rs1401188	0	promoter_flanking_region
chr4_36	rs34953805	rs13110858,rs1401188	0	promoter_flanking_region
chr4_36	rs67564729	rs13110858,rs1401188	0	promoter_flanking_region
chr4_36	rs34764236	rs13110858,rs1401188	0	promoter_flanking_region
chr4_36	rs35151022	rs13110858,rs1401188	0	promoter_flanking_region
chr4_36	rs10718580	rs13110858,rs1401188	0	promoter_flanking_region
chr4_36	rs34051782	rs13110858,rs1401188	0	promoter_flanking_region
chr4_36	rs13109999	rs13110858,rs1401188	0	promoter_flanking_region
chr4_36	rs13143577	rs13110858,rs1401188	0	promoter_flanking_region
chr4_36	rs1356571	rs13110858,rs1401188	0	promoter_flanking_region
chr4_36	rs13111961	rs13110858,rs1401188	0	promoter_flanking_region
chr4_36	rs1401189	rs13110858,rs1401188	0	promoter_flanking_region
chr4_36	rs5858409	rs13110858,rs1401188	0	promoter_flanking_region
chr4_36	rs13110858	rs13110858,rs1401188	1	promoter_flanking_region
chr4_36	rs1401188	rs13110858,rs1401188	1	promoter_flanking_region
chr4_36	rs1401187	rs13110858,rs1401188	0	promoter_flanking_region
chr4_36	rs2412775	rs13110858,rs1401188	0	promoter_flanking_region
chr4_36	rs11734140	rs13110858,rs1401188	0	promoter_flanking_region
chr4_36	rs10593093	rs13110858,rs1401188	0	promoter_flanking_region
chr4_36	rs141474405	rs13110858,rs1401188	0	promoter_flanking_region
chr4_37	rs1036160	rs2017370,rs1432327	0	CTCF_binding_site
chr4_38	rs115546396	rs114383553,rs17007061	0	open_chromatin_region
chr4_38	rs7696450	rs114383553,rs17007061	0	promoter_flanking_region
chr4_38	rs17007085	rs114383553,rs17007061	0	promoter_flanking_region
chr4_38	rs7670071	rs114383553,rs17007061	0	enhancer
chr4_38	rs1379972	rs114383553,rs17007061	0	enhancer
chr4_38	rs56258471	rs114383553,rs17007061	0	CTCF_binding_site
chr4_38	rs56258471	rs114383553,rs17007061	0	enhancer
chr4_38	rs11732924	rs114383553,rs17007061	0	enhancer
chr4_38	rs6845477	rs114383553,rs17007061	0	open_chromatin_region
chr4_38	rs17007171	rs114383553,rs17007061	0	open_chromatin_region
chr4_39	rs55935372	rs36083417,rs35230778,rs67600034,rs66717029,rs35556180,rs5016158,rs4257605,rs13143879	0	promoter
chr4_39	rs7696828	rs36083417,rs35230778,rs67600034,rs66717029,rs35556180,rs5016158,rs4257605,rs13143879	0	promoter
chr4_39	rs35895824	rs36083417,rs35230778,rs67600034,rs66717029,rs35556180,rs5016158,rs4257605,rs13143879	0	CTCF_binding_site
chr4_39	rs35895824	rs36083417,rs35230778,rs67600034,rs66717029,rs35556180,rs5016158,rs4257605,rs13143879	0	promoter_flanking_region
chr4_39	rs6835827	rs36083417,rs35230778,rs67600034,rs66717029,rs35556180,rs5016158,rs4257605,rs13143879	0	promoter_flanking_region
chr4_39	rs999049	rs36083417,rs35230778,rs67600034,rs66717029,rs35556180,rs5016158,rs4257605,rs13143879	0	promoter_flanking_region
chr4_39	rs7683287	rs36083417,rs35230778,rs67600034,rs66717029,rs35556180,rs5016158,rs4257605,rs13143879	0	enhancer
chr4_39	rs2218791	rs36083417,rs35230778,rs67600034,rs66717029,rs35556180,rs5016158,rs4257605,rs13143879	0	enhancer
chr4_39	rs13119630	rs36083417,rs35230778,rs67600034,rs66717029,rs35556180,rs5016158,rs4257605,rs13143879	0	CTCF_binding_site
chr4_39	rs4283611	rs36083417,rs35230778,rs67600034,rs66717029,rs35556180,rs5016158,rs4257605,rs13143879	0	promoter_flanking_region
chr4_39	rs28667539	rs36083417,rs35230778,rs67600034,rs66717029,rs35556180,rs5016158,rs4257605,rs13143879	0	promoter_flanking_region
chr4_39	rs4260485	rs36083417,rs35230778,rs67600034,rs66717029,rs35556180,rs5016158,rs4257605,rs13143879	0	promoter_flanking_region
chr4_39	rs11723190	rs36083417,rs35230778,rs67600034,rs66717029,rs35556180,rs5016158,rs4257605,rs13143879	0	promoter_flanking_region
chr4_39	rs13112781	rs36083417,rs35230778,rs67600034,rs66717029,rs35556180,rs5016158,rs4257605,rs13143879	0	promoter_flanking_region
chr4_39	rs11100812	rs36083417,rs35230778,rs67600034,rs66717029,rs35556180,rs5016158,rs4257605,rs13143879	0	promoter_flanking_region
chr4_39	rs11723377	rs36083417,rs35230778,rs67600034,rs66717029,rs35556180,rs5016158,rs4257605,rs13143879	0	promoter_flanking_region
chr4_39	rs72353608	rs36083417,rs35230778,rs67600034,rs66717029,rs35556180,rs5016158,rs4257605,rs13143879	0	promoter_flanking_region
chr4_39	rs62339607	rs36083417,rs35230778,rs67600034,rs66717029,rs35556180,rs5016158,rs4257605,rs13143879	0	enhancer
chr4_39	rs2622380	rs36083417,rs35230778,rs67600034,rs66717029,rs35556180,rs5016158,rs4257605,rs13143879	0	enhancer
chr4_39	rs13106488	rs36083417,rs35230778,rs67600034,rs66717029,rs35556180,rs5016158,rs4257605,rs13143879	0	TF_binding_site
chr4_39	rs13105102	rs36083417,rs35230778,rs67600034,rs66717029,rs35556180,rs5016158,rs4257605,rs13143879	0	TF_binding_site
chr4_39	rs13105118	rs36083417,rs35230778,rs67600034,rs66717029,rs35556180,rs5016158,rs4257605,rs13143879	0	TF_binding_site
chr4_39	rs67236581	rs36083417,rs35230778,rs67600034,rs66717029,rs35556180,rs5016158,rs4257605,rs13143879	0	TF_binding_site
chr4_39	rs6828935	rs36083417,rs35230778,rs67600034,rs66717029,rs35556180,rs5016158,rs4257605,rs13143879	0	promoter_flanking_region
chr4_39	rs56402663	rs36083417,rs35230778,rs67600034,rs66717029,rs35556180,rs5016158,rs4257605,rs13143879	0	promoter_flanking_region
chr4_39	rs1992656	rs36083417,rs35230778,rs67600034,rs66717029,rs35556180,rs5016158,rs4257605,rs13143879	0	promoter_flanking_region
chr4_39	rs1992655	rs36083417,rs35230778,rs67600034,rs66717029,rs35556180,rs5016158,rs4257605,rs13143879	0	promoter_flanking_region
chr4_39	rs4240334	rs36083417,rs35230778,rs67600034,rs66717029,rs35556180,rs5016158,rs4257605,rs13143879	0	promoter_flanking_region
chr4_39	rs12498325	rs36083417,rs35230778,rs67600034,rs66717029,rs35556180,rs5016158,rs4257605,rs13143879	0	promoter_flanking_region
chr4_39	rs11326607	rs36083417,rs35230778,rs67600034,rs66717029,rs35556180,rs5016158,rs4257605,rs13143879	0	promoter_flanking_region
chr4_39	rs60392709	rs36083417,rs35230778,rs67600034,rs66717029,rs35556180,rs5016158,rs4257605,rs13143879	0	promoter_flanking_region
chr4_39	rs4835057	rs36083417,rs35230778,rs67600034,rs66717029,rs35556180,rs5016158,rs4257605,rs13143879	0	promoter_flanking_region
chr4_39	rs4240335	rs36083417,rs35230778,rs67600034,rs66717029,rs35556180,rs5016158,rs4257605,rs13143879	0	promoter_flanking_region
chr4_39	rs143390057	rs36083417,rs35230778,rs67600034,rs66717029,rs35556180,rs5016158,rs4257605,rs13143879	0	promoter_flanking_region
chr4_39	rs12499429	rs36083417,rs35230778,rs67600034,rs66717029,rs35556180,rs5016158,rs4257605,rs13143879	0	promoter_flanking_region
chr4_39	rs9997931	rs36083417,rs35230778,rs67600034,rs66717029,rs35556180,rs5016158,rs4257605,rs13143879	0	promoter
chr4_39	rs11735519	rs36083417,rs35230778,rs67600034,rs66717029,rs35556180,rs5016158,rs4257605,rs13143879	0	promoter
chr4_39	rs11735519	rs36083417,rs35230778,rs67600034,rs66717029,rs35556180,rs5016158,rs4257605,rs13143879	0	CTCF_binding_site
chr4_39	rs1838522	rs36083417,rs35230778,rs67600034,rs66717029,rs35556180,rs5016158,rs4257605,rs13143879	0	promoter
chr4_39	rs12644175	rs36083417,rs35230778,rs67600034,rs66717029,rs35556180,rs5016158,rs4257605,rs13143879	0	CTCF_binding_site
chr4_39	rs2036880	rs36083417,rs35230778,rs67600034,rs66717029,rs35556180,rs5016158,rs4257605,rs13143879	0	CTCF_binding_site
chr4_39	rs12507468	rs36083417,rs35230778,rs67600034,rs66717029,rs35556180,rs5016158,rs4257605,rs13143879	0	CTCF_binding_site
chr4_39	rs74590858	rs36083417,rs35230778,rs67600034,rs66717029,rs35556180,rs5016158,rs4257605,rs13143879	0	promoter
chr4_39	rs78713560	rs36083417,rs35230778,rs67600034,rs66717029,rs35556180,rs5016158,rs4257605,rs13143879	0	promoter
chr4_39	rs1849135	rs36083417,rs35230778,rs67600034,rs66717029,rs35556180,rs5016158,rs4257605,rs13143879	0	promoter
chr4_39	rs1849136	rs36083417,rs35230778,rs67600034,rs66717029,rs35556180,rs5016158,rs4257605,rs13143879	0	promoter
chr4_39	rs7691575	rs36083417,rs35230778,rs67600034,rs66717029,rs35556180,rs5016158,rs4257605,rs13143879	0	promoter
chr4_39	rs7691575	rs36083417,rs35230778,rs67600034,rs66717029,rs35556180,rs5016158,rs4257605,rs13143879	0	CTCF_binding_site
chr4_39	rs1973608	rs36083417,rs35230778,rs67600034,rs66717029,rs35556180,rs5016158,rs4257605,rs13143879	0	promoter
chr4_39	rs10027246	rs36083417,rs35230778,rs67600034,rs66717029,rs35556180,rs5016158,rs4257605,rs13143879	0	promoter_flanking_region
chr4_39	rs12501790	rs36083417,rs35230778,rs67600034,rs66717029,rs35556180,rs5016158,rs4257605,rs13143879	0	enhancer
chr4_39	rs61611095	rs36083417,rs35230778,rs67600034,rs66717029,rs35556180,rs5016158,rs4257605,rs13143879	0	promoter_flanking_region
chr4_39	rs4835449	rs36083417,rs35230778,rs67600034,rs66717029,rs35556180,rs5016158,rs4257605,rs13143879	0	promoter_flanking_region
chr4_39	rs4835452	rs36083417,rs35230778,rs67600034,rs66717029,rs35556180,rs5016158,rs4257605,rs13143879	0	promoter_flanking_region
chr4_39	rs1828508	rs36083417,rs35230778,rs67600034,rs66717029,rs35556180,rs5016158,rs4257605,rs13143879	0	promoter_flanking_region
chr4_39	rs57164372	rs36083417,rs35230778,rs67600034,rs66717029,rs35556180,rs5016158,rs4257605,rs13143879	0	promoter_flanking_region
chr4_39	rs3914160	rs36083417,rs35230778,rs67600034,rs66717029,rs35556180,rs5016158,rs4257605,rs13143879	0	promoter_flanking_region
chr4_39	rs12644336	rs36083417,rs35230778,rs67600034,rs66717029,rs35556180,rs5016158,rs4257605,rs13143879	0	promoter_flanking_region
chr4_39	rs13124157	rs36083417,rs35230778,rs67600034,rs66717029,rs35556180,rs5016158,rs4257605,rs13143879	0	promoter_flanking_region
chr4_39	rs13147170	rs36083417,rs35230778,rs67600034,rs66717029,rs35556180,rs5016158,rs4257605,rs13143879	0	promoter_flanking_region
chr4_39	rs13147184	rs36083417,rs35230778,rs67600034,rs66717029,rs35556180,rs5016158,rs4257605,rs13143879	0	promoter_flanking_region
chr4_39	rs57986566	rs36083417,rs35230778,rs67600034,rs66717029,rs35556180,rs5016158,rs4257605,rs13143879	0	promoter_flanking_region
chr4_39	rs13124170	rs36083417,rs35230778,rs67600034,rs66717029,rs35556180,rs5016158,rs4257605,rs13143879	0	promoter_flanking_region
chr4_39	rs61547558	rs36083417,rs35230778,rs67600034,rs66717029,rs35556180,rs5016158,rs4257605,rs13143879	0	promoter_flanking_region
chr4_39	rs13147562	rs36083417,rs35230778,rs67600034,rs66717029,rs35556180,rs5016158,rs4257605,rs13143879	0	promoter_flanking_region
chr4_39	rs56789263	rs36083417,rs35230778,rs67600034,rs66717029,rs35556180,rs5016158,rs4257605,rs13143879	0	promoter_flanking_region
chr4_39	rs58999309	rs36083417,rs35230778,rs67600034,rs66717029,rs35556180,rs5016158,rs4257605,rs13143879	0	promoter_flanking_region
chr4_39	rs58217748	rs36083417,rs35230778,rs67600034,rs66717029,rs35556180,rs5016158,rs4257605,rs13143879	0	promoter_flanking_region
chr4_39	rs61182896	rs36083417,rs35230778,rs67600034,rs66717029,rs35556180,rs5016158,rs4257605,rs13143879	0	promoter_flanking_region
chr4_39	rs60305467	rs36083417,rs35230778,rs67600034,rs66717029,rs35556180,rs5016158,rs4257605,rs13143879	0	promoter_flanking_region
chr4_39	rs4835112	rs36083417,rs35230778,rs67600034,rs66717029,rs35556180,rs5016158,rs4257605,rs13143879	0	CTCF_binding_site
chr4_39	rs12505537	rs36083417,rs35230778,rs67600034,rs66717029,rs35556180,rs5016158,rs4257605,rs13143879	0	CTCF_binding_site
chr4_39	rs80169890	rs36083417,rs35230778,rs67600034,rs66717029,rs35556180,rs5016158,rs4257605,rs13143879	0	CTCF_binding_site
chr4_39	rs4835470	rs36083417,rs35230778,rs67600034,rs66717029,rs35556180,rs5016158,rs4257605,rs13143879	0	CTCF_binding_site
chr4_39	rs4835114	rs36083417,rs35230778,rs67600034,rs66717029,rs35556180,rs5016158,rs4257605,rs13143879	0	CTCF_binding_site
chr4_39	rs35599924	rs36083417,rs35230778,rs67600034,rs66717029,rs35556180,rs5016158,rs4257605,rs13143879	0	CTCF_binding_site
chr4_39	rs4516663	rs36083417,rs35230778,rs67600034,rs66717029,rs35556180,rs5016158,rs4257605,rs13143879	0	CTCF_binding_site
chr4_39	rs2089840	rs36083417,rs35230778,rs67600034,rs66717029,rs35556180,rs5016158,rs4257605,rs13143879	0	CTCF_binding_site
chr4_39	rs36018946	rs36083417,rs35230778,rs67600034,rs66717029,rs35556180,rs5016158,rs4257605,rs13143879	0	CTCF_binding_site
chr4_39	rs36018946	rs36083417,rs35230778,rs67600034,rs66717029,rs35556180,rs5016158,rs4257605,rs13143879	0	open_chromatin_region
chr4_39	rs2089839	rs36083417,rs35230778,rs67600034,rs66717029,rs35556180,rs5016158,rs4257605,rs13143879	0	CTCF_binding_site
chr4_39	rs2089839	rs36083417,rs35230778,rs67600034,rs66717029,rs35556180,rs5016158,rs4257605,rs13143879	0	open_chromatin_region
chr4_39	rs4585249	rs36083417,rs35230778,rs67600034,rs66717029,rs35556180,rs5016158,rs4257605,rs13143879	0	CTCF_binding_site
chr4_39	rs6419322	rs36083417,rs35230778,rs67600034,rs66717029,rs35556180,rs5016158,rs4257605,rs13143879	0	CTCF_binding_site
chr4_39	rs4054607	rs36083417,rs35230778,rs67600034,rs66717029,rs35556180,rs5016158,rs4257605,rs13143879	0	CTCF_binding_site
chr4_39	rs1511425	rs36083417,rs35230778,rs67600034,rs66717029,rs35556180,rs5016158,rs4257605,rs13143879	0	promoter_flanking_region
chr4_39	rs1849120	rs36083417,rs35230778,rs67600034,rs66717029,rs35556180,rs5016158,rs4257605,rs13143879	0	promoter_flanking_region
chr4_39	rs4835476	rs36083417,rs35230778,rs67600034,rs66717029,rs35556180,rs5016158,rs4257605,rs13143879	0	promoter_flanking_region
chr4_39	rs1828502	rs36083417,rs35230778,rs67600034,rs66717029,rs35556180,rs5016158,rs4257605,rs13143879	0	promoter_flanking_region
chr4_39	rs7668698	rs36083417,rs35230778,rs67600034,rs66717029,rs35556180,rs5016158,rs4257605,rs13143879	0	promoter_flanking_region
chr4_39	rs6537231	rs36083417,rs35230778,rs67600034,rs66717029,rs35556180,rs5016158,rs4257605,rs13143879	0	promoter_flanking_region
chr4_39	rs1877234	rs36083417,rs35230778,rs67600034,rs66717029,rs35556180,rs5016158,rs4257605,rs13143879	0	promoter_flanking_region
chr4_39	rs1877235	rs36083417,rs35230778,rs67600034,rs66717029,rs35556180,rs5016158,rs4257605,rs13143879	0	promoter_flanking_region
chr4_39	rs13110141	rs36083417,rs35230778,rs67600034,rs66717029,rs35556180,rs5016158,rs4257605,rs13143879	0	promoter_flanking_region
chr4_40	rs2584417	rs116811275,rs2584415	0	enhancer
chr4_40	rs10001176	rs116811275,rs2584415	0	enhancer
chr5_42	rs3733787	rs697720,rs814789	0	promoter_flanking_region
chr5_42	rs4701671	rs697720,rs814789	0	enhancer
chr5_42	rs10474784	rs697720,rs814789	0	enhancer
chr5_43	rs13169313	rs35320705,rs4495139,rs4391133	0	CTCF_binding_site
chr5_43	rs13169313	rs35320705,rs4495139,rs4391133	0	TF_binding_site
chr5_43	rs13156405	rs35320705,rs4495139,rs4391133	0	CTCF_binding_site
chr5_43	rs13156405	rs35320705,rs4495139,rs4391133	0	TF_binding_site
chr5_43	rs13169626	rs35320705,rs4495139,rs4391133	0	CTCF_binding_site
chr5_43	rs13169626	rs35320705,rs4495139,rs4391133	0	TF_binding_site
chr5_43	rs13156411	rs35320705,rs4495139,rs4391133	0	CTCF_binding_site
chr5_43	rs13156411	rs35320705,rs4495139,rs4391133	0	TF_binding_site
chr5_43	rs13156707	rs35320705,rs4495139,rs4391133	0	TF_binding_site
chr5_43	rs34137592	rs35320705,rs4495139,rs4391133	0	promoter_flanking_region
chr5_43	rs34584504	rs35320705,rs4495139,rs4391133	0	promoter_flanking_region
chr5_43	rs1453358	rs35320705,rs4495139,rs4391133	0	promoter_flanking_region
chr5_43	rs11134274	rs35320705,rs4495139,rs4391133	0	promoter_flanking_region
chr5_43	rs11134275	rs35320705,rs4495139,rs4391133	0	promoter_flanking_region
chr5_43	rs11134276	rs35320705,rs4495139,rs4391133	0	promoter_flanking_region
chr5_43	rs11134277	rs35320705,rs4495139,rs4391133	0	promoter_flanking_region
chr5_43	rs62357580	rs35320705,rs4495139,rs4391133	0	promoter_flanking_region
chr5_43	rs6879324	rs35320705,rs4495139,rs4391133	0	CTCF_binding_site
chr5_44	rs4700209	rs12654351,rs61282965	0	enhancer
chr5_44	rs12153068	rs12654351,rs61282965	0	CTCF_binding_site
chr5_44	rs12153068	rs12654351,rs61282965	0	promoter_flanking_region
chr5_44	rs73085594	rs12654351,rs61282965	0	promoter_flanking_region
chr5_44	rs112605580	rs12654351,rs61282965	0	enhancer
chr5_44	rs61282965	rs12654351,rs61282965	1	CTCF_binding_site
chr5_44	rs111500133	rs12654351,rs61282965	0	enhancer
chr5_44	rs73089877	rs12654351,rs61282965	0	enhancer
chr5_44	rs7702309	rs12654351,rs61282965	0	open_chromatin_region
chr5_44	rs112557508	rs12654351,rs61282965	0	CTCF_binding_site
chr5_44	rs7729312	rs12654351,rs61282965	0	enhancer
chr5_44	rs7713500	rs12654351,rs61282965	0	promoter_flanking_region
chr5_45	rs75083437	rs74340794,rs6453168	0	promoter_flanking_region
chr5_45	rs114446604	rs74340794,rs6453168	0	promoter_flanking_region
chr5_45	rs79618096	rs74340794,rs6453168	0	promoter_flanking_region
chr5_46	rs2522383	rs257894,rs257899	0	CTCF_binding_site
chr5_46	rs2545016	rs257894,rs257899	0	CTCF_binding_site
chr5_46	rs2526258	rs257894,rs257899	0	promoter_flanking_region
chr5_47	rs114324212	rs10053606,rs114944655	0	promoter_flanking_region
chr5_48	rs4913052	rs12518731,rs7448829	0	promoter
chr5_48	rs7731746	rs12518731,rs7448829	0	promoter
chr5_48	rs991357	rs12518731,rs7448829	0	promoter
chr5_48	rs17104071	rs12518731,rs7448829	0	promoter_flanking_region
chr5_48	rs999237	rs12518731,rs7448829	0	promoter_flanking_region
chr5_48	rs75518736	rs12518731,rs7448829	0	promoter_flanking_region
chr5_48	rs17104082	rs12518731,rs7448829	0	enhancer
chr5_48	rs4143868	rs12518731,rs7448829	0	enhancer
chr5_48	rs60263762	rs12518731,rs7448829	0	enhancer
chr5_48	rs11167921	rs12518731,rs7448829	0	enhancer
chr5_48	rs12521709	rs12518731,rs7448829	0	promoter_flanking_region
chr5_48	rs72055049	rs12518731,rs7448829	0	promoter_flanking_region
chr5_48	rs11167922	rs12518731,rs7448829	0	promoter_flanking_region
chr5_48	rs1432777	rs12518731,rs7448829	0	promoter_flanking_region
chr5_48	rs1432778	rs12518731,rs7448829	0	promoter_flanking_region
chr5_48	rs1432779	rs12518731,rs7448829	0	promoter_flanking_region
chr5_48	rs6876962	rs12518731,rs7448829	0	promoter_flanking_region
chr5_48	rs34843879	rs12518731,rs7448829	0	promoter_flanking_region
chr5_48	rs6897115	rs12518731,rs7448829	0	promoter_flanking_region
chr5_48	rs6887711	rs12518731,rs7448829	0	promoter_flanking_region
chr5_48	rs6883675	rs12518731,rs7448829	0	promoter_flanking_region
chr5_48	rs4913056	rs12518731,rs7448829	0	promoter_flanking_region
chr5_48	rs4913057	rs12518731,rs7448829	0	promoter_flanking_region
chr5_48	rs28405052	rs12518731,rs7448829	0	promoter_flanking_region
chr5_48	rs12518731	rs12518731,rs7448829	1	promoter_flanking_region
chr5_48	rs1076333	rs12518731,rs7448829	0	promoter_flanking_region
chr5_48	rs1076334	rs12518731,rs7448829	0	promoter_flanking_region
chr5_48	rs7448829	rs12518731,rs7448829	1	promoter_flanking_region
chr5_48	rs12522672	rs12518731,rs7448829	0	promoter_flanking_region
chr5_48	rs1076335	rs12518731,rs7448829	0	promoter_flanking_region
chr5_48	rs72652830	rs12518731,rs7448829	0	promoter_flanking_region
chr5_48	rs72652831	rs12518731,rs7448829	0	promoter_flanking_region
chr5_48	rs77727455	rs12518731,rs7448829	0	promoter_flanking_region
chr5_48	rs17104168	rs12518731,rs7448829	0	promoter_flanking_region
chr5_48	rs10079570	rs12518731,rs7448829	0	promoter_flanking_region
chr5_48	rs10051160	rs12518731,rs7448829	0	promoter_flanking_region
chr5_48	rs6869971	rs12518731,rs7448829	0	promoter_flanking_region
chr5_48	rs1158381	rs12518731,rs7448829	0	promoter_flanking_region
chr5_48	rs6866055	rs12518731,rs7448829	0	promoter_flanking_region
chr5_48	rs4913058	rs12518731,rs7448829	0	promoter_flanking_region
chr5_48	rs5871950	rs12518731,rs7448829	0	open_chromatin_region
chr6_49	rs9378296	rs6907529,rs6907725	0	promoter_flanking_region
chr6_50	rs415338	rs885183,rs7760357	0	CTCF_binding_site
chr6_50	rs550170	rs885183,rs7760357	0	open_chromatin_region
chr6_50	rs383470	rs885183,rs7760357	0	open_chromatin_region
chr6_50	rs446293	rs885183,rs7760357	0	open_chromatin_region
chr6_50	rs11267667	rs885183,rs7760357	0	promoter_flanking_region
chr6_50	rs885183	rs885183,rs7760357	1	promoter_flanking_region
chr6_50	rs7754765	rs885183,rs7760357	0	promoter_flanking_region
chr6_50	rs11242925	rs885183,rs7760357	0	promoter_flanking_region
chr6_50	rs7760357	rs885183,rs7760357	1	promoter_flanking_region
chr6_50	rs34098039	rs885183,rs7760357	0	promoter_flanking_region
chr6_50	rs11242929	rs885183,rs7760357	0	promoter_flanking_region
chr6_50	rs12190411	rs885183,rs7760357	0	promoter_flanking_region
chr6_50	rs6921285	rs885183,rs7760357	0	promoter_flanking_region
chr6_50	rs150225651	rs885183,rs7760357	0	promoter_flanking_region
chr6_50	rs1411655	rs885183,rs7760357	0	CTCF_binding_site
chr6_50	rs139126783	rs885183,rs7760357	0	CTCF_binding_site
chr6_50	rs2150235	rs885183,rs7760357	0	enhancer
chr6_50	rs6914933	rs885183,rs7760357	0	open_chromatin_region
chr6_51	rs10755714	rs4587166,rs114654385	0	open_chromatin_region
chr6_51	rs114654385	rs4587166,rs114654385	1	promoter_flanking_region
chr6_51	rs4521573	rs4587166,rs114654385	0	promoter_flanking_region
chr6_52	rs16877883	rs111481058,rs73751802	0	CTCF_binding_site
chr6_52	rs16877883	rs111481058,rs73751802	0	TF_binding_site
chr6_52	rs79562874	rs111481058,rs73751802	0	CTCF_binding_site
chr6_52	rs79562874	rs111481058,rs73751802	0	TF_binding_site
chr6_52	rs76605799	rs111481058,rs73751802	0	CTCF_binding_site
chr6_52	rs76605799	rs111481058,rs73751802	0	TF_binding_site
chr6_52	rs74683408	rs111481058,rs73751802	0	CTCF_binding_site
chr6_52	rs74683408	rs111481058,rs73751802	0	TF_binding_site
chr6_52	rs10498959	rs111481058,rs73751802	0	CTCF_binding_site
chr6_52	rs10498959	rs111481058,rs73751802	0	enhancer
chr6_52	rs79668658	rs111481058,rs73751802	0	CTCF_binding_site
chr6_52	rs62439116	rs111481058,rs73751802	0	CTCF_binding_site
chr6_52	rs62439148	rs111481058,rs73751802	0	open_chromatin_region
chr6_52	rs62439149	rs111481058,rs73751802	0	open_chromatin_region
chr6_52	rs62439150	rs111481058,rs73751802	0	open_chromatin_region
chr6_52	rs201164489	rs111481058,rs73751802	0	CTCF_binding_site
chr6_52	rs201164489	rs111481058,rs73751802	0	promoter_flanking_region
chr6_52	rs34786226	rs111481058,rs73751802	0	enhancer
chr6_52	rs199778924	rs111481058,rs73751802	0	enhancer
chr6_52	rs1535228	rs111481058,rs73751802	0	enhancer
chr6_52	rs12663746	rs111481058,rs73751802	0	CTCF_binding_site
chr6_52	rs9450569	rs111481058,rs73751802	0	promoter
chr6_52	rs62440767	rs111481058,rs73751802	0	promoter
chr6_52	rs148094623	rs111481058,rs73751802	0	promoter
chr6_52	rs9450573	rs111481058,rs73751802	0	promoter
chr6_52	rs143682304	rs111481058,rs73751802	0	promoter
chr6_52	rs143682304	rs111481058,rs73751802	0	CTCF_binding_site
chr6_52	rs73751802	rs111481058,rs73751802	1	enhancer
chr6_52	rs73751802	rs111481058,rs73751802	1	CTCF_binding_site
chr6_53	rs2981973	rs2981973,rs61400956,rs13198547	1	promoter_flanking_region
chr6_53	rs9355625	rs2981973,rs61400956,rs13198547	0	promoter_flanking_region
chr6_53	rs9364907	rs2981973,rs61400956,rs13198547	0	promoter_flanking_region
chr6_53	rs9364908	rs2981973,rs61400956,rs13198547	0	promoter_flanking_region
chr6_53	rs9364475	rs2981973,rs61400956,rs13198547	0	promoter_flanking_region
chr6_53	rs9364909	rs2981973,rs61400956,rs13198547	0	promoter_flanking_region
chr6_53	rs2072761	rs2981973,rs61400956,rs13198547	0	promoter_flanking_region
chr6_53	rs61400956	rs2981973,rs61400956,rs13198547	1	promoter_flanking_region
chr7_54	rs17172499	rs35401101,rs78982892	0	promoter_flanking_region
chr7_54	rs34345812	rs35401101,rs78982892	0	promoter_flanking_region
chr7_54	rs35572793	rs35401101,rs78982892	0	promoter_flanking_region
chr7_54	rs34999606	rs35401101,rs78982892	0	promoter_flanking_region
chr7_54	rs10951812	rs35401101,rs78982892	0	promoter_flanking_region
chr7_54	rs12535823	rs35401101,rs78982892	0	promoter_flanking_region
chr7_54	rs12530759	rs35401101,rs78982892	0	promoter_flanking_region
chr7_54	rs140774667	rs35401101,rs78982892	0	promoter_flanking_region
chr7_54	rs75390434	rs35401101,rs78982892	0	promoter_flanking_region
chr7_54	rs62459191	rs35401101,rs78982892	0	promoter_flanking_region
chr7_54	rs78982892	rs35401101,rs78982892	1	CTCF_binding_site
chr7_54	rs78982892	rs35401101,rs78982892	1	promoter_flanking_region
chr7_54	rs62459192	rs35401101,rs78982892	0	CTCF_binding_site
chr7_54	rs62459192	rs35401101,rs78982892	0	promoter_flanking_region
chr7_54	rs62459193	rs35401101,rs78982892	0	CTCF_binding_site
chr7_54	rs62459193	rs35401101,rs78982892	0	promoter_flanking_region
chr7_54	rs188776222	rs35401101,rs78982892	0	promoter_flanking_region
chr7_54	rs62459194	rs35401101,rs78982892	0	promoter_flanking_region
chr7_54	rs62459210	rs35401101,rs78982892	0	promoter_flanking_region
chr7_54	rs78071290	rs35401101,rs78982892	0	promoter_flanking_region
chr7_54	rs113502960	rs35401101,rs78982892	0	promoter_flanking_region
chr7_54	rs62459211	rs35401101,rs78982892	0	promoter_flanking_region
chr7_55	rs10261383	rs34925936,rs10807948,rs6463439	0	CTCF_binding_site
chr7_55	rs5004318	rs34925936,rs10807948,rs6463439	0	CTCF_binding_site
chr7_55	rs5004319	rs34925936,rs10807948,rs6463439	0	CTCF_binding_site
chr7_55	rs5004320	rs34925936,rs10807948,rs6463439	0	CTCF_binding_site
chr7_55	rs5004321	rs34925936,rs10807948,rs6463439	0	CTCF_binding_site
chr7_55	rs5004322	rs34925936,rs10807948,rs6463439	0	CTCF_binding_site
chr7_55	rs5004323	rs34925936,rs10807948,rs6463439	0	CTCF_binding_site
chr7_55	rs5004324	rs34925936,rs10807948,rs6463439	0	CTCF_binding_site
chr7_55	rs5004325	rs34925936,rs10807948,rs6463439	0	CTCF_binding_site
chr7_55	rs7791909	rs34925936,rs10807948,rs6463439	0	promoter
chr7_55	rs6463441	rs34925936,rs10807948,rs6463439	0	enhancer
chr7_55	rs140516848	rs34925936,rs10807948,rs6463439	0	promoter_flanking_region
chr7_56	rs56272838	rs59983200,rs6954826	0	CTCF_binding_site
chr7_56	rs56272838	rs59983200,rs6954826	0	enhancer
chr7_56	rs11976000	rs59983200,rs6954826	0	CTCF_binding_site
chr7_56	rs11976000	rs59983200,rs6954826	0	enhancer
chr7_56	rs73694916	rs59983200,rs6954826	0	promoter_flanking_region
chr7_56	rs6971984	rs59983200,rs6954826	0	promoter_flanking_region
chr7_56	rs6968469	rs59983200,rs6954826	0	promoter_flanking_region
chr7_56	rs6972518	rs59983200,rs6954826	0	promoter_flanking_region
chr7_56	rs6968482	rs59983200,rs6954826	0	promoter_flanking_region
chr7_56	rs6968793	rs59983200,rs6954826	0	promoter_flanking_region
chr7_56	rs6972829	rs59983200,rs6954826	0	promoter_flanking_region
chr7_56	rs59983200	rs59983200,rs6954826	1	promoter_flanking_region
chr7_56	rs61347184	rs59983200,rs6954826	0	promoter_flanking_region
chr7_56	rs57917157	rs59983200,rs6954826	0	promoter_flanking_region
chr7_56	rs73694989	rs59983200,rs6954826	0	enhancer
chr7_56	rs4294138	rs59983200,rs6954826	0	enhancer
chr7_56	rs73694990	rs59983200,rs6954826	0	enhancer
chr7_56	rs77354535	rs59983200,rs6954826	0	enhancer
chr7_56	rs6954826	rs59983200,rs6954826	1	enhancer
chr7_57	rs6961106	rs6961106,rs10277941	1	enhancer
chr7_57	rs10270837	rs6961106,rs10277941	0	enhancer
chr7_57	rs10270837	rs6961106,rs10277941	0	CTCF_binding_site
chr7_58	rs112640098	rs112913525,rs113096256	0	promoter_flanking_region
chr7_60	rs60158858	rs4960719,rs60158858	1	CTCF_binding_site
chr7_60	rs114008989	rs4960719,rs60158858	0	CTCF_binding_site
chr7_60	rs59274457	rs4960719,rs60158858	0	CTCF_binding_site
chr8_61	rs12676976	rs7006706,rs9792249	0	promoter_flanking_region
chr8_62	rs4448230	rs112056832,rs4557662	0	open_chromatin_region
chr8_62	rs16880128	rs112056832,rs4557662	0	promoter_flanking_region
chr8_62	rs11985806	rs112056832,rs4557662	0	CTCF_binding_site
chr8_62	rs11985806	rs112056832,rs4557662	0	promoter_flanking_region
chr8_62	rs7819538	rs112056832,rs4557662	0	promoter_flanking_region
chr8_62	rs7823266	rs112056832,rs4557662	0	promoter_flanking_region
chr8_62	rs11996279	rs112056832,rs4557662	0	promoter_flanking_region
chr8_63	rs16937736	rs16937736,rs16937745	1	promoter_flanking_region
chr8_63	rs56132774	rs16937736,rs16937745	0	promoter_flanking_region
chr8_63	rs58960563	rs16937736,rs16937745	0	promoter_flanking_region
chr8_63	rs16937738	rs16937736,rs16937745	0	promoter_flanking_region
chr8_63	rs111989008	rs16937736,rs16937745	0	promoter_flanking_region
chr8_63	rs149970791	rs16937736,rs16937745	0	CTCF_binding_site
chr8_64	rs1473951	rs1839333,rs1913638	0	open_chromatin_region
chr8_64	rs2941459	rs1839333,rs1913638	0	open_chromatin_region
chr8_64	rs2943549	rs1839333,rs1913638	0	promoter
chr8_64	rs2943551	rs1839333,rs1913638	0	promoter
chr8_64	rs2943552	rs1839333,rs1913638	0	promoter
chr8_64	rs2943553	rs1839333,rs1913638	0	promoter
chr8_64	rs34511417	rs1839333,rs1913638	0	promoter
chr8_64	rs2977931	rs1839333,rs1913638	0	promoter
chr8_64	rs2943554	rs1839333,rs1913638	0	open_chromatin_region
chr8_64	rs1800922	rs1839333,rs1913638	0	open_chromatin_region
chr8_64	rs1913640	rs1839333,rs1913638	0	open_chromatin_region
chr8_64	rs2922770	rs1839333,rs1913638	0	CTCF_binding_site
chr8_64	rs2167065	rs1839333,rs1913638	0	CTCF_binding_site
chr8_64	rs2060603	rs1839333,rs1913638	0	CTCF_binding_site
chr8_64	rs2060602	rs1839333,rs1913638	0	CTCF_binding_site
chr8_65	rs112868427	rs76289037,rs77043672	0	promoter_flanking_region
chr8_65	rs7001961	rs76289037,rs77043672	0	open_chromatin_region
chr8_66	rs10955730	rs6469547,rs78745861	0	TF_binding_site
chr8_66	rs11992602	rs6469547,rs78745861	0	enhancer
chr8_66	rs78197805	rs6469547,rs78745861	0	CTCF_binding_site
chr8_66	rs16886401	rs6469547,rs78745861	0	CTCF_binding_site
chr8_67	rs16891980	rs80024835,rs61594459	0	CTCF_binding_site
chr8_67	rs16891980	rs80024835,rs61594459	0	enhancer
chr8_67	rs16892010	rs80024835,rs61594459	0	open_chromatin_region
chr8_67	rs16892025	rs80024835,rs61594459	0	enhancer
chr8_67	rs16892025	rs80024835,rs61594459	0	CTCF_binding_site
chr8_67	rs117297544	rs80024835,rs61594459	0	enhancer
chr8_67	rs78693685	rs80024835,rs61594459	0	enhancer
chr8_67	rs74309046	rs80024835,rs61594459	0	promoter_flanking_region
chr8_67	rs76152469	rs80024835,rs61594459	0	open_chromatin_region
chr8_67	rs61560423	rs80024835,rs61594459	0	open_chromatin_region
chr8_67	rs61408014	rs80024835,rs61594459	0	promoter
chr8_67	rs61408014	rs80024835,rs61594459	0	CTCF_binding_site
chr8_67	rs375593392	rs80024835,rs61594459	0	promoter
chr8_67	rs375593392	rs80024835,rs61594459	0	CTCF_binding_site
chr8_67	rs57709706	rs80024835,rs61594459	0	promoter
chr8_67	rs57709706	rs80024835,rs61594459	0	CTCF_binding_site
chr8_67	rs61584027	rs80024835,rs61594459	0	promoter
chr8_67	rs61584027	rs80024835,rs61594459	0	CTCF_binding_site
chr8_67	rs9693461	rs80024835,rs61594459	0	promoter_flanking_region
chr8_67	rs78237579	rs80024835,rs61594459	0	promoter_flanking_region
chr8_67	rs16892203	rs80024835,rs61594459	0	promoter_flanking_region
chr8_67	rs77401907	rs80024835,rs61594459	0	promoter_flanking_region
chr8_67	rs61358846	rs80024835,rs61594459	0	promoter_flanking_region
chr8_67	rs16892211	rs80024835,rs61594459	0	promoter_flanking_region
chr8_68	rs118184657	rs74850759,rs75751974	0	promoter_flanking_region
chr8_68	rs74370312	rs74850759,rs75751974	0	promoter_flanking_region
chr8_68	rs117709743	rs74850759,rs75751974	0	promoter_flanking_region
chr8_68	rs75389744	rs74850759,rs75751974	0	enhancer
chr8_68	rs57352999	rs74850759,rs75751974	0	promoter
chr8_68	rs57622127	rs74850759,rs75751974	0	promoter
chr8_68	rs77473382	rs74850759,rs75751974	0	promoter
chr8_68	rs56712922	rs74850759,rs75751974	0	promoter
chr8_68	rs79809114	rs74850759,rs75751974	0	CTCF_binding_site
chr8_68	rs61628633	rs74850759,rs75751974	0	CTCF_binding_site
chr8_68	rs61319676	rs74850759,rs75751974	0	CTCF_binding_site
chr8_68	rs78984294	rs74850759,rs75751974	0	enhancer
chr8_68	rs76514029	rs74850759,rs75751974	0	enhancer
chr8_68	rs74635638	rs74850759,rs75751974	0	enhancer
chr8_68	rs77521827	rs74850759,rs75751974	0	enhancer
chr9_70	rs12350798	rs1333635,rs1460834	0	promoter_flanking_region
chr9_70	rs290266	rs1333635,rs1460834	0	promoter_flanking_region
chr9_70	rs290276	rs1333635,rs1460834	0	promoter_flanking_region
chr9_70	rs290274	rs1333635,rs1460834	0	promoter_flanking_region
chr9_70	rs290271	rs1333635,rs1460834	0	promoter_flanking_region
chr9_70	rs290268	rs1333635,rs1460834	0	promoter_flanking_region
chr9_70	rs2562397	rs1333635,rs1460834	0	promoter
chr9_70	rs2562397	rs1333635,rs1460834	0	CTCF_binding_site
chr9_70	rs1319677	rs1333635,rs1460834	0	promoter
chr9_70	rs1333635	rs1333635,rs1460834	1	promoter
chr9_70	rs2780701	rs1333635,rs1460834	0	promoter
chr9_70	rs2562396	rs1333635,rs1460834	0	promoter
chr9_70	rs2774260	rs1333635,rs1460834	0	promoter
chr9_70	rs1333634	rs1333635,rs1460834	0	promoter
chr9_70	rs2613308	rs1333635,rs1460834	0	promoter
chr9_70	rs2780702	rs1333635,rs1460834	0	promoter
chr9_70	rs17488335	rs1333635,rs1460834	0	promoter
chr9_71	rs10816533	rs10978973,rs10117921	0	promoter
chr9_71	rs10816535	rs10978973,rs10117921	0	promoter
chr9_71	rs12347618	rs10978973,rs10117921	0	promoter
chr9_71	rs35906155	rs10978973,rs10117921	0	promoter
chr9_71	rs3824482	rs10978973,rs10117921	0	promoter
chr9_71	rs3780549	rs10978973,rs10117921	0	promoter
chr9_71	rs3780550	rs10978973,rs10117921	0	promoter
chr9_71	rs3780551	rs10978973,rs10117921	0	promoter
chr9_71	rs3780552	rs10978973,rs10117921	0	promoter
chr9_71	rs3780553	rs10978973,rs10117921	0	promoter
chr9_71	rs12004507	rs10978973,rs10117921	0	promoter
chr9_71	rs12004507	rs10978973,rs10117921	0	CTCF_binding_site
chr9_71	rs35334289	rs10978973,rs10117921	0	promoter
chr9_71	rs35334289	rs10978973,rs10117921	0	CTCF_binding_site
chr9_71	rs12349952	rs10978973,rs10117921	0	promoter
chr9_71	rs12340602	rs10978973,rs10117921	0	promoter
chr9_71	rs12336500	rs10978973,rs10117921	0	promoter
chr9_71	rs10978952	rs10978973,rs10117921	0	promoter_flanking_region
chr9_71	rs10978953	rs10978973,rs10117921	0	promoter_flanking_region
chr9_71	rs7858098	rs10978973,rs10117921	0	promoter_flanking_region
chr9_71	rs7847117	rs10978973,rs10117921	0	promoter_flanking_region
chr9_71	rs75501138	rs10978973,rs10117921	0	promoter_flanking_region
chr9_71	rs10979329	rs10978973,rs10117921	0	promoter
chr9_71	rs12350434	rs10978973,rs10117921	0	promoter
chr9_71	rs7032889	rs10978973,rs10117921	0	enhancer
chr9_71	rs1327781	rs10978973,rs10117921	0	CTCF_binding_site
chr9_71	rs10116146	rs10978973,rs10117921	0	promoter
chr9_71	rs73546584	rs10978973,rs10117921	0	promoter_flanking_region
chr9_71	rs200617709	rs10978973,rs10117921	0	promoter_flanking_region
chr9_71	rs113556248	rs10978973,rs10117921	0	promoter_flanking_region
chr9_71	rs150437498	rs10978973,rs10117921	0	promoter_flanking_region
chr9_71	rs138232498	rs10978973,rs10117921	0	promoter_flanking_region
chr9_71	rs138163401	rs10978973,rs10117921	0	promoter_flanking_region
chr9_71	rs2479209	rs10978973,rs10117921	0	promoter_flanking_region
chr9_71	rs2769083	rs10978973,rs10117921	0	promoter_flanking_region
chr9_71	rs112479868	rs10978973,rs10117921	0	promoter_flanking_region
chr9_71	rs200482444	rs10978973,rs10117921	0	promoter
chr9_71	rs146055313	rs10978973,rs10117921	0	promoter
chr9_71	rs10979669	rs10978973,rs10117921	0	promoter
chr9_71	rs10979670	rs10978973,rs10117921	0	promoter
chr9_71	rs199743943	rs10978973,rs10117921	0	promoter_flanking_region
chr9_71	rs201430891	rs10978973,rs10117921	0	promoter_flanking_region
chr9_71	rs1810788	rs10978973,rs10117921	0	promoter_flanking_region
chr9_71	rs1810788	rs10978973,rs10117921	0	CTCF_binding_site
chr9_71	rs142166362	rs10978973,rs10117921	0	CTCF_binding_site
chr9_71	rs2486612	rs10978973,rs10117921	0	open_chromatin_region
chr9_71	rs2486612	rs10978973,rs10117921	0	CTCF_binding_site
chr9_71	rs7873123	rs10978973,rs10117921	0	promoter_flanking_region
chr9_71	rs61674450	rs10978973,rs10117921	0	promoter_flanking_region
chr9_71	rs3118787	rs10978973,rs10117921	0	promoter_flanking_region
chr9_71	rs2260632	rs10978973,rs10117921	0	promoter_flanking_region
chr9_71	rs2809685	rs10978973,rs10117921	0	promoter_flanking_region
chr9_71	rs2809699	rs10978973,rs10117921	0	promoter_flanking_region
chr9_71	rs139898725	rs10978973,rs10117921	0	promoter_flanking_region
chr9_71	rs10980063	rs10978973,rs10117921	0	promoter_flanking_region
chr9_71	rs2809731	rs10978973,rs10117921	0	promoter_flanking_region
chr9_71	rs3122086	rs10978973,rs10117921	0	promoter_flanking_region
chr9_71	rs186587390	rs10978973,rs10117921	0	promoter
chr9_71	rs11998922	rs10978973,rs10117921	0	promoter_flanking_region
chr9_71	rs148981680	rs10978973,rs10117921	0	promoter_flanking_region
chr9_72	rs607409	rs946496,rs7851995	0	TF_binding_site
chr9_72	rs2253922	rs946496,rs7851995	0	promoter_flanking_region
chr9_72	rs11443685	rs946496,rs7851995	0	promoter_flanking_region
chr9_72	rs495837	rs946496,rs7851995	0	promoter_flanking_region
chr9_72	rs2254413	rs946496,rs7851995	0	enhancer
chr9_72	rs581128	rs946496,rs7851995	0	enhancer
chr9_72	rs2244106	rs946496,rs7851995	0	enhancer
chr9_72	rs11367880	rs946496,rs7851995	0	enhancer
chr9_72	rs506884	rs946496,rs7851995	0	enhancer
chr9_72	rs7863051	rs946496,rs7851995	0	promoter_flanking_region
chr9_72	rs7848935	rs946496,rs7851995	0	promoter_flanking_region
chr9_72	rs7866010	rs946496,rs7851995	0	promoter_flanking_region
chr9_72	rs7866018	rs946496,rs7851995	0	promoter_flanking_region
chr9_72	rs7851963	rs946496,rs7851995	0	promoter_flanking_region
chr9_72	rs7866123	rs946496,rs7851995	0	promoter_flanking_region
chr9_72	rs7851995	rs946496,rs7851995	1	promoter_flanking_region
chr9_72	rs7855321	rs946496,rs7851995	0	promoter_flanking_region
chr9_72	rs10117354	rs946496,rs7851995	0	promoter_flanking_region
chr9_72	rs10819898	rs946496,rs7851995	0	promoter_flanking_region
chr9_72	rs10819901	rs946496,rs7851995	0	promoter_flanking_region
chr9_72	rs2993802	rs946496,rs7851995	0	promoter_flanking_region
chr9_72	rs3021454	rs946496,rs7851995	0	promoter_flanking_region
chr9_72	rs2993803	rs946496,rs7851995	0	promoter_flanking_region
chr9_72	rs2993804	rs946496,rs7851995	0	promoter_flanking_region
chr9_74	rs2002164	rs2002164,rs1806674	1	promoter_flanking_region
chr9_74	rs55800626	rs2002164,rs1806674	0	promoter_flanking_region
chr9_74	rs56783479	rs2002164,rs1806674	0	promoter_flanking_region
chr9_74	rs1806676	rs2002164,rs1806674	0	promoter_flanking_region
chr9_74	rs1806676	rs2002164,rs1806674	0	CTCF_binding_site
chr9_74	rs1806675	rs2002164,rs1806674	0	promoter_flanking_region
chr9_74	rs1806675	rs2002164,rs1806674	0	CTCF_binding_site
chr9_74	rs1806674	rs2002164,rs1806674	1	promoter_flanking_region
chr9_74	rs1806674	rs2002164,rs1806674	1	CTCF_binding_site
chr9_74	rs16911117	rs2002164,rs1806674	0	CTCF_binding_site
chr9_74	rs16911117	rs2002164,rs1806674	0	TF_binding_site
chr9_74	rs7038223	rs2002164,rs1806674	0	CTCF_binding_site
chr9_74	rs7038223	rs2002164,rs1806674	0	TF_binding_site
chr9_74	rs60535180	rs2002164,rs1806674	0	TF_binding_site
chr9_74	rs60535180	rs2002164,rs1806674	0	CTCF_binding_site
chr9_74	rs60342310	rs2002164,rs1806674	0	promoter_flanking_region
chr9_74	rs73662537	rs2002164,rs1806674	0	promoter_flanking_region
chr9_74	rs56081524	rs2002164,rs1806674	0	promoter_flanking_region
chr9_74	rs7871942	rs2002164,rs1806674	0	promoter_flanking_region
chr9_74	rs7856673	rs2002164,rs1806674	0	promoter_flanking_region
chr9_74	rs7857227	rs2002164,rs1806674	0	promoter_flanking_region
chr9_74	rs7854015	rs2002164,rs1806674	0	promoter_flanking_region
chr9_74	rs58874107	rs2002164,rs1806674	0	promoter_flanking_region
chr9_74	rs56292432	rs2002164,rs1806674	0	promoter_flanking_region
chr9_74	rs4144642	rs2002164,rs1806674	0	enhancer
chr9_74	rs4144646	rs2002164,rs1806674	0	enhancer
chr9_74	rs4144645	rs2002164,rs1806674	0	enhancer
chr9_74	rs4144644	rs2002164,rs1806674	0	CTCF_binding_site
chr9_74	rs4144643	rs2002164,rs1806674	0	CTCF_binding_site
chr9_74	rs11999380	rs2002164,rs1806674	0	CTCF_binding_site
chr9_74	rs11999381	rs2002164,rs1806674	0	CTCF_binding_site
chr9_74	rs11999418	rs2002164,rs1806674	0	CTCF_binding_site
chr9_74	rs7850608	rs2002164,rs1806674	0	CTCF_binding_site
chr9_74	rs60731892	rs2002164,rs1806674	0	promoter
chr9_74	rs56344629	rs2002164,rs1806674	0	promoter
chr9_74	rs57426025	rs2002164,rs1806674	0	promoter_flanking_region
chr10_75	rs117669511	rs7101132,rs115066892	0	promoter_flanking_region
chr10_75	rs71491588	rs7101132,rs115066892	0	promoter_flanking_region
chr10_75	rs7903301	rs7101132,rs115066892	0	promoter_flanking_region
chr10_75	rs7903304	rs7101132,rs115066892	0	promoter_flanking_region
chr10_75	rs12777291	rs7101132,rs115066892	0	promoter_flanking_region
chr10_75	rs7900408	rs7101132,rs115066892	0	promoter_flanking_region
chr10_75	rs71491589	rs7101132,rs115066892	0	promoter_flanking_region
chr10_75	rs12267039	rs7101132,rs115066892	0	promoter_flanking_region
chr10_75	rs12260299	rs7101132,rs115066892	0	promoter_flanking_region
chr10_75	rs2035887	rs7101132,rs115066892	0	promoter_flanking_region
chr10_75	rs2035886	rs7101132,rs115066892	0	promoter_flanking_region
chr10_75	rs4357603	rs7101132,rs115066892	0	promoter_flanking_region
chr10_75	rs7099997	rs7101132,rs115066892	0	promoter_flanking_region
chr10_75	rs10508427	rs7101132,rs115066892	0	promoter_flanking_region
chr10_75	rs7101132	rs7101132,rs115066892	1	promoter_flanking_region
chr10_75	rs115066892	rs7101132,rs115066892	1	promoter_flanking_region
chr10_75	rs12762860	rs7101132,rs115066892	0	promoter_flanking_region
chr10_75	rs148260638	rs7101132,rs115066892	0	promoter_flanking_region
chr10_75	rs186016176	rs7101132,rs115066892	0	promoter_flanking_region
chr10_75	rs71491590	rs7101132,rs115066892	0	promoter_flanking_region
chr10_75	rs71491591	rs7101132,rs115066892	0	promoter_flanking_region
chr10_75	rs71491592	rs7101132,rs115066892	0	promoter_flanking_region
chr10_75	rs71491593	rs7101132,rs115066892	0	promoter_flanking_region
chr10_75	rs17150672	rs7101132,rs115066892	0	promoter_flanking_region
chr10_75	rs17150672	rs7101132,rs115066892	0	CTCF_binding_site
chr10_75	rs117205150	rs7101132,rs115066892	0	promoter_flanking_region
chr10_75	rs28579466	rs7101132,rs115066892	0	promoter_flanking_region
chr10_75	rs7085711	rs7101132,rs115066892	0	promoter_flanking_region
chr10_76	rs74138933	rs60146158,rs17154663	0	CTCF_binding_site
chr10_76	rs59695605	rs60146158,rs17154663	0	promoter_flanking_region
chr10_76	rs74138951	rs60146158,rs17154663	0	promoter_flanking_region
chr10_76	rs112026996	rs60146158,rs17154663	0	promoter_flanking_region
chr10_76	rs17154683	rs60146158,rs17154663	0	promoter_flanking_region
chr10_76	rs74138952	rs60146158,rs17154663	0	promoter_flanking_region
chr10_76	rs80108658	rs60146158,rs17154663	0	promoter_flanking_region
chr10_76	rs74138975	rs60146158,rs17154663	0	promoter_flanking_region
chr10_76	rs60071723	rs60146158,rs17154663	0	promoter_flanking_region
chr10_76	rs57992999	rs60146158,rs17154663	0	promoter_flanking_region
chr10_76	rs200527403	rs60146158,rs17154663	0	promoter_flanking_region
chr10_77	rs76639976	rs7091495,rs10793555	0	promoter_flanking_region
chr10_77	rs12245478	rs7091495,rs10793555	0	promoter_flanking_region
chr10_77	rs78853794	rs7091495,rs10793555	0	promoter_flanking_region
chr10_77	rs75189511	rs7091495,rs10793555	0	CTCF_binding_site
chr10_77	rs2101071	rs7091495,rs10793555	0	CTCF_binding_site
chr10_77	rs2101070	rs7091495,rs10793555	0	CTCF_binding_site
chr10_77	rs2086420	rs7091495,rs10793555	0	CTCF_binding_site
chr10_77	rs17502111	rs7091495,rs10793555	0	promoter_flanking_region
chr10_77	rs10751358	rs7091495,rs10793555	0	promoter_flanking_region
chr10_77	rs17411047	rs7091495,rs10793555	0	enhancer
chr10_77	rs11591579	rs7091495,rs10793555	0	enhancer
chr10_77	rs7097094	rs7091495,rs10793555	0	open_chromatin_region
chr10_77	rs6593437	rs7091495,rs10793555	0	open_chromatin_region
chr10_77	rs11239228	rs7091495,rs10793555	0	CTCF_binding_site
chr10_77	rs11239228	rs7091495,rs10793555	0	TF_binding_site
chr10_77	rs17156852	rs7091495,rs10793555	0	CTCF_binding_site
chr10_77	rs10900105	rs7091495,rs10793555	0	open_chromatin_region
chr10_77	rs10900106	rs7091495,rs10793555	0	open_chromatin_region
chr10_77	rs10793557	rs7091495,rs10793555	0	promoter_flanking_region
chr10_77	rs10900107	rs7091495,rs10793555	0	promoter_flanking_region
chr10_77	rs75792550	rs7091495,rs10793555	0	promoter_flanking_region
chr10_77	rs1325166	rs7091495,rs10793555	0	promoter_flanking_region
chr10_77	rs1325167	rs7091495,rs10793555	0	promoter_flanking_region
chr10_78	rs34256039	rs2482578,rs35112339	0	open_chromatin_region
chr10_78	rs112190979	rs2482578,rs35112339	0	open_chromatin_region
chr10_78	rs17124874	rs2482578,rs35112339	0	open_chromatin_region
chr10_78	rs58133860	rs2482578,rs35112339	0	open_chromatin_region
chr10_78	rs35573175	rs2482578,rs35112339	0	open_chromatin_region
chr10_78	rs35573175	rs2482578,rs35112339	0	CTCF_binding_site
chr10_78	rs12769194	rs2482578,rs35112339	0	enhancer
chr10_78	rs12769194	rs2482578,rs35112339	0	CTCF_binding_site
chr10_79	rs2244375	rs363266,rs363227	0	enhancer
chr10_79	rs2244249	rs363266,rs363227	0	enhancer
chr10_79	rs2255321	rs363266,rs363227	0	enhancer
chr10_79	rs3523	rs363266,rs363227	0	enhancer
chr10_79	rs363275	rs363266,rs363227	0	enhancer
chr10_79	rs363276	rs363266,rs363227	0	enhancer
chr10_79	rs2532815	rs363266,rs363227	0	enhancer
chr10_79	rs10886059	rs363266,rs363227	0	promoter_flanking_region
chr10_79	rs4752048	rs363266,rs363227	0	promoter_flanking_region
chr10_79	rs2532841	rs363266,rs363227	0	promoter_flanking_region
chr10_79	rs2532840	rs363266,rs363227	0	promoter_flanking_region
chr10_79	rs2794436	rs363266,rs363227	0	promoter_flanking_region
chr10_79	rs2532783	rs363266,rs363227	0	promoter_flanking_region
chr10_79	rs2532785	rs363266,rs363227	0	CTCF_binding_site
chr10_79	rs2532785	rs363266,rs363227	0	enhancer
chr10_79	rs2532786	rs363266,rs363227	0	CTCF_binding_site
chr10_79	rs2532786	rs363266,rs363227	0	enhancer
chr10_79	rs7897828	rs363266,rs363227	0	CTCF_binding_site
chr10_79	rs10082478	rs363266,rs363227	0	CTCF_binding_site
chr10_79	rs7898092	rs363266,rs363227	0	CTCF_binding_site
chr10_79	rs2803799	rs363266,rs363227	0	promoter_flanking_region
chr10_79	rs2803800	rs363266,rs363227	0	promoter_flanking_region
chr10_79	rs1008448	rs363266,rs363227	0	promoter_flanking_region
chr10_79	rs2532788	rs363266,rs363227	0	promoter_flanking_region
chr10_79	rs35594578	rs363266,rs363227	0	promoter_flanking_region
chr10_79	rs2803804	rs363266,rs363227	0	enhancer
chr10_79	rs2532795	rs363266,rs363227	0	CTCF_binding_site
chr10_79	rs2794416	rs363266,rs363227	0	CTCF_binding_site
chr10_79	rs2532796	rs363266,rs363227	0	CTCF_binding_site
chr10_79	rs9943328	rs363266,rs363227	0	promoter
chr10_79	rs11369291	rs363266,rs363227	0	promoter
chr10_79	rs192171756	rs363266,rs363227	0	promoter
chr10_79	rs7088401	rs363266,rs363227	0	promoter
chr10_79	rs1935166	rs363266,rs363227	0	promoter
chr10_79	rs10886065	rs363266,rs363227	0	promoter
chr10_79	rs112790095	rs363266,rs363227	0	promoter
chr10_79	rs11197974	rs363266,rs363227	0	CTCF_binding_site
chr10_79	rs11197974	rs363266,rs363227	0	promoter
chr10_79	rs3814230	rs363266,rs363227	0	promoter
chr10_79	rs3814229	rs363266,rs363227	0	promoter
chr10_79	rs183125037	rs363266,rs363227	0	CTCF_binding_site
chr10_79	rs183125037	rs363266,rs363227	0	promoter
chr10_79	rs188309885	rs363266,rs363227	0	CTCF_binding_site
chr10_79	rs188309885	rs363266,rs363227	0	promoter
chr10_79	rs2420457	rs363266,rs363227	0	CTCF_binding_site
chr10_79	rs2420457	rs363266,rs363227	0	promoter
chr10_79	rs7070594	rs363266,rs363227	0	CTCF_binding_site
chr10_79	rs7070594	rs363266,rs363227	0	promoter
chr10_79	rs7086651	rs363266,rs363227	0	CTCF_binding_site
chr10_79	rs7086651	rs363266,rs363227	0	promoter
chr10_79	rs140936789	rs363266,rs363227	0	promoter
chr10_79	rs1860407	rs363266,rs363227	0	promoter
chr10_79	rs201997317	rs363266,rs363227	0	promoter_flanking_region
chr10_80	rs77975145	rs74577795,rs79314843	0	open_chromatin_region
chr10_80	rs115243910	rs74577795,rs79314843	0	open_chromatin_region
chr10_80	rs79380136	rs74577795,rs79314843	0	CTCF_binding_site
chr11_81	rs2344933	rs12365992,rs10839577	0	promoter
chr11_81	rs11040902	rs12365992,rs10839577	0	enhancer
chr11_81	rs2344831	rs12365992,rs10839577	0	promoter_flanking_region
chr11_81	rs7930022	rs12365992,rs10839577	0	promoter_flanking_region
chr11_81	rs7944694	rs12365992,rs10839577	0	promoter_flanking_region
chr11_81	rs11433645	rs12365992,rs10839577	0	promoter_flanking_region
chr11_81	rs10769698	rs12365992,rs10839577	0	CTCF_binding_site
chr11_82	rs17232674	rs1992498,rs11025618	0	promoter_flanking_region
chr11_83	rs11037775	rs11037782,rs57007890	0	CTCF_binding_site
chr11_83	rs72892093	rs11037782,rs57007890	0	CTCF_binding_site
chr11_83	rs58195031	rs11037782,rs57007890	0	CTCF_binding_site
chr11_83	rs11037780	rs11037782,rs57007890	0	CTCF_binding_site
chr11_83	rs11037781	rs11037782,rs57007890	0	CTCF_binding_site
chr11_83	rs11037782	rs11037782,rs57007890	1	CTCF_binding_site
chr11_83	rs11037783	rs11037782,rs57007890	0	CTCF_binding_site
chr11_84	rs55805348	rs59439599,rs60599873	0	promoter_flanking_region
chr11_84	rs73532387	rs59439599,rs60599873	0	promoter_flanking_region
chr11_84	rs74394756	rs59439599,rs60599873	0	promoter_flanking_region
chr11_84	rs74394756	rs59439599,rs60599873	0	CTCF_binding_site
chr11_84	rs73532391	rs59439599,rs60599873	0	promoter_flanking_region
chr11_84	rs73532392	rs59439599,rs60599873	0	promoter_flanking_region
chr11_84	rs55863521	rs59439599,rs60599873	0	promoter_flanking_region
chr11_84	rs73534124	rs59439599,rs60599873	0	open_chromatin_region
chr11_84	rs73534144	rs59439599,rs60599873	0	CTCF_binding_site
chr11_84	rs73534148	rs59439599,rs60599873	0	CTCF_binding_site
chr11_84	rs57009928	rs59439599,rs60599873	0	promoter_flanking_region
chr11_84	rs57063205	rs59439599,rs60599873	0	promoter_flanking_region
chr11_84	rs60552266	rs59439599,rs60599873	0	promoter_flanking_region
chr11_84	rs60306914	rs59439599,rs60599873	0	promoter_flanking_region
chr11_84	rs148942405	rs59439599,rs60599873	0	enhancer
chr11_84	rs60462266	rs59439599,rs60599873	0	enhancer
chr11_84	rs59055707	rs59439599,rs60599873	0	CTCF_binding_site
chr11_85	rs76954827	rs2085736,rs7118489	0	promoter_flanking_region
chr11_85	rs7106258	rs2085736,rs7118489	0	promoter_flanking_region
chr11_85	rs7935776	rs2085736,rs7118489	0	CTCF_binding_site
chr11_85	rs12287612	rs2085736,rs7118489	0	CTCF_binding_site
chr11_85	rs2045611	rs2085736,rs7118489	0	CTCF_binding_site
chr11_85	rs2045610	rs2085736,rs7118489	0	CTCF_binding_site
chr11_85	rs2045609	rs2085736,rs7118489	0	CTCF_binding_site
chr11_85	rs2045609	rs2085736,rs7118489	0	enhancer
chr11_85	rs7936801	rs2085736,rs7118489	0	CTCF_binding_site
chr11_85	rs7936801	rs2085736,rs7118489	0	enhancer
chr11_85	rs7926594	rs2085736,rs7118489	0	enhancer
chr11_85	rs139529352	rs2085736,rs7118489	0	promoter_flanking_region
chr11_85	rs147661830	rs2085736,rs7118489	0	promoter_flanking_region
chr11_85	rs138888888	rs2085736,rs7118489	0	promoter_flanking_region
chr11_85	rs145327921	rs2085736,rs7118489	0	promoter_flanking_region
chr11_85	rs142477722	rs2085736,rs7118489	0	promoter_flanking_region
chr11_85	rs145923028	rs2085736,rs7118489	0	promoter_flanking_region
chr11_85	rs12805429	rs2085736,rs7118489	0	promoter_flanking_region
chr11_85	rs144298213	rs2085736,rs7118489	0	promoter_flanking_region
chr11_85	rs35743540	rs2085736,rs7118489	0	promoter_flanking_region
chr11_85	rs34925912	rs2085736,rs7118489	0	promoter_flanking_region
chr11_85	rs34715700	rs2085736,rs7118489	0	promoter_flanking_region
chr11_85	rs35443029	rs2085736,rs7118489	0	promoter_flanking_region
chr11_85	rs35671543	rs2085736,rs7118489	0	promoter_flanking_region
chr11_85	rs9888169	rs2085736,rs7118489	0	promoter_flanking_region
chr11_85	rs9888301	rs2085736,rs7118489	0	promoter_flanking_region
chr11_85	rs9888255	rs2085736,rs7118489	0	promoter_flanking_region
chr11_85	rs9888140	rs2085736,rs7118489	0	promoter_flanking_region
chr11_85	rs1031705	rs2085736,rs7118489	0	enhancer
chr11_85	rs17142991	rs2085736,rs7118489	0	enhancer
chr11_85	rs12577082	rs2085736,rs7118489	0	open_chromatin_region
chr11_85	rs7934819	rs2085736,rs7118489	0	CTCF_binding_site
chr11_85	rs7949959	rs2085736,rs7118489	0	CTCF_binding_site
chr11_85	rs1121859	rs2085736,rs7118489	0	open_chromatin_region
chr11_85	rs139241879	rs2085736,rs7118489	0	promoter_flanking_region
chr11_85	rs139241879	rs2085736,rs7118489	0	CTCF_binding_site
chr11_86	rs10891438	rs2249268,rs60427879	0	open_chromatin_region
chr11_86	rs2848523	rs2249268,rs60427879	0	CTCF_binding_site
chr11_87	rs79653028	rs78930157,rs2658831	0	CTCF_binding_site
chr11_87	rs113295766	rs78930157,rs2658831	0	CTCF_binding_site
chr11_87	rs111909435	rs78930157,rs2658831	0	CTCF_binding_site
chr11_87	rs789538	rs78930157,rs2658831	0	CTCF_binding_site
chr11_87	rs789538	rs78930157,rs2658831	0	enhancer
chr11_87	rs79032889	rs78930157,rs2658831	0	CTCF_binding_site
chr11_87	rs79032889	rs78930157,rs2658831	0	enhancer
chr11_87	rs79016283	rs78930157,rs2658831	0	CTCF_binding_site
chr11_87	rs79016283	rs78930157,rs2658831	0	enhancer
chr11_87	rs77191764	rs78930157,rs2658831	0	CTCF_binding_site
chr11_87	rs113317791	rs78930157,rs2658831	0	enhancer
chr11_87	rs78192986	rs78930157,rs2658831	0	enhancer
chr11_87	rs2658826	rs78930157,rs2658831	0	enhancer
chr11_87	rs2658827	rs78930157,rs2658831	0	enhancer
chr11_87	rs2695812	rs78930157,rs2658831	0	enhancer
chr11_87	rs2658828	rs78930157,rs2658831	0	enhancer
chr11_87	rs2658829	rs78930157,rs2658831	0	enhancer
chr11_87	rs2658830	rs78930157,rs2658831	0	enhancer
chr11_87	rs2658831	rs78930157,rs2658831	1	enhancer
chr11_87	rs2658832	rs78930157,rs2658831	0	enhancer
chr11_87	rs2463407	rs78930157,rs2658831	0	enhancer
chr11_87	rs2512902	rs78930157,rs2658831	0	enhancer
chr11_87	rs2512901	rs78930157,rs2658831	0	enhancer
chr11_87	rs4053976	rs78930157,rs2658831	0	CTCF_binding_site
chr11_87	rs4053976	rs78930157,rs2658831	0	promoter_flanking_region
chr11_87	rs3862597	rs78930157,rs2658831	0	CTCF_binding_site
chr11_87	rs3862597	rs78930157,rs2658831	0	promoter_flanking_region
chr11_87	rs2658846	rs78930157,rs2658831	0	enhancer
chr11_87	rs2695825	rs78930157,rs2658831	0	enhancer
chr11_87	rs2695826	rs78930157,rs2658831	0	enhancer
chr11_88	rs75179193	rs113801096,rs113239695	0	TF_binding_site
chr11_88	rs77513169	rs113801096,rs113239695	0	TF_binding_site
chr11_88	rs74905937	rs113801096,rs113239695	0	TF_binding_site
chr11_88	rs7938670	rs113801096,rs113239695	0	enhancer
chr12_89	rs10878520	rs78715118,rs1504314	0	enhancer
chr12_89	rs12580443	rs78715118,rs1504314	0	enhancer
chr12_89	rs10878521	rs78715118,rs1504314	0	enhancer
chr12_89	rs11176484	rs78715118,rs1504314	0	enhancer
chr12_89	rs10878522	rs78715118,rs1504314	0	enhancer
chr12_89	rs10878522	rs78715118,rs1504314	0	CTCF_binding_site
chr12_89	rs10878523	rs78715118,rs1504314	0	enhancer
chr12_89	rs10878523	rs78715118,rs1504314	0	CTCF_binding_site
chr12_89	rs10506515	rs78715118,rs1504314	0	enhancer
chr12_89	rs10506515	rs78715118,rs1504314	0	CTCF_binding_site
chr12_89	rs10878524	rs78715118,rs1504314	0	enhancer
chr12_89	rs35597151	rs78715118,rs1504314	0	enhancer
chr12_89	rs12228305	rs78715118,rs1504314	0	enhancer
chr12_89	rs12228327	rs78715118,rs1504314	0	enhancer
chr12_89	rs12228339	rs78715118,rs1504314	0	enhancer
chr12_89	rs189832781	rs78715118,rs1504314	0	promoter_flanking_region
chr12_89	rs12811743	rs78715118,rs1504314	0	promoter_flanking_region
chr12_89	rs12811914	rs78715118,rs1504314	0	promoter_flanking_region
chr12_90	rs11180559	rs1480001,rs17115323	0	promoter_flanking_region
chr12_90	rs1552040	rs1480001,rs17115323	0	enhancer
chr12_90	rs3912214	rs1480001,rs17115323	0	promoter_flanking_region
chr12_90	rs3858534	rs1480001,rs17115323	0	promoter_flanking_region
chr12_90	rs2620687	rs1480001,rs17115323	0	CTCF_binding_site
chr12_90	rs2620687	rs1480001,rs17115323	0	TF_binding_site
chr12_90	rs1697753	rs1480001,rs17115323	0	enhancer
chr12_90	rs1148004	rs1480001,rs17115323	0	promoter_flanking_region
chr12_90	rs1148003	rs1480001,rs17115323	0	promoter_flanking_region
chr12_90	rs1795382	rs1480001,rs17115323	0	promoter_flanking_region
chr12_90	rs114615574	rs1480001,rs17115323	0	promoter_flanking_region
chr12_90	rs1383101	rs1480001,rs17115323	0	promoter_flanking_region
chr12_90	rs4882638	rs1480001,rs17115323	0	enhancer
chr12_90	rs113669979	rs1480001,rs17115323	0	promoter_flanking_region
chr12_91	rs371152999	rs77368915,rs59624358	0	open_chromatin_region
chr12_91	rs199990436	rs77368915,rs59624358	0	open_chromatin_region
chr12_91	rs11835122	rs77368915,rs59624358	0	promoter_flanking_region
chr12_91	rs75683925	rs77368915,rs59624358	0	promoter_flanking_region
chr12_91	rs11830847	rs77368915,rs59624358	0	CTCF_binding_site
chr12_91	rs74826223	rs77368915,rs59624358	0	promoter_flanking_region
chr12_91	rs11833815	rs77368915,rs59624358	0	CTCF_binding_site
chr12_91	rs7968612	rs77368915,rs59624358	0	CTCF_binding_site
chr12_91	rs115301057	rs77368915,rs59624358	0	promoter_flanking_region
chr12_92	rs111941299	rs115434075,rs61939378	0	promoter
chr12_93	rs60287084	rs4883635,rs11146967	0	promoter
chr12_93	rs7314676	rs4883635,rs11146967	0	promoter
chr12_93	rs4883635	rs4883635,rs11146967	1	promoter
chr12_93	rs150249840	rs4883635,rs11146967	0	promoter
chr12_93	rs12819734	rs4883635,rs11146967	0	CTCF_binding_site
chr12_93	rs77860070	rs4883635,rs11146967	0	CTCF_binding_site
chr12_93	rs5745089	rs4883635,rs11146967	0	CTCF_binding_site
chr13_94	rs12866393	rs9508539,rs7324224	0	promoter_flanking_region
chr13_94	rs34414325	rs9508539,rs7324224	0	promoter_flanking_region
chr13_94	rs114202425	rs9508539,rs7324224	0	promoter_flanking_region
chr13_94	rs71434733	rs9508539,rs7324224	0	promoter_flanking_region
chr13_94	rs35253788	rs9508539,rs7324224	0	CTCF_binding_site
chr13_94	rs35253788	rs9508539,rs7324224	0	promoter_flanking_region
chr13_94	rs71434734	rs9508539,rs7324224	0	promoter_flanking_region
chr13_94	rs7987685	rs9508539,rs7324224	0	promoter_flanking_region
chr13_94	rs7992475	rs9508539,rs7324224	0	promoter_flanking_region
chr13_94	rs7993901	rs9508539,rs7324224	0	promoter_flanking_region
chr13_94	rs36018849	rs9508539,rs7324224	0	promoter_flanking_region
chr13_94	rs35502883	rs9508539,rs7324224	0	TF_binding_site
chr13_94	rs6490422	rs9508539,rs7324224	0	promoter_flanking_region
chr13_94	rs6490422	rs9508539,rs7324224	0	CTCF_binding_site
chr13_94	rs6490423	rs9508539,rs7324224	0	CTCF_binding_site
chr13_94	rs9508534	rs9508539,rs7324224	0	promoter_flanking_region
chr13_94	rs9508535	rs9508539,rs7324224	0	promoter_flanking_region
chr13_94	rs17625129	rs9508539,rs7324224	0	CTCF_binding_site
chr13_94	rs9508538	rs9508539,rs7324224	0	CTCF_binding_site
chr13_94	rs9508539	rs9508539,rs7324224	1	CTCF_binding_site
chr13_94	rs12870927	rs9508539,rs7324224	0	CTCF_binding_site
chr13_94	rs12870250	rs9508539,rs7324224	0	CTCF_binding_site
chr13_94	rs73157108	rs9508539,rs7324224	0	CTCF_binding_site
chr13_94	rs12854213	rs9508539,rs7324224	0	CTCF_binding_site
chr13_94	rs1467601	rs9508539,rs7324224	0	enhancer
chr13_95	rs204572	rs2285330,rs73462625	0	enhancer
chr13_95	rs2285331	rs2285330,rs73462625	0	enhancer
chr13_96	rs73175516	rs6311,rs36213156	0	promoter_flanking_region
chr13_96	rs2760341	rs6311,rs36213156	0	promoter_flanking_region
chr13_96	rs2760342	rs6311,rs36213156	0	promoter_flanking_region
chr13_96	rs2760343	rs6311,rs36213156	0	promoter_flanking_region
chr13_96	rs2760344	rs6311,rs36213156	0	promoter_flanking_region
chr13_96	rs2760345	rs6311,rs36213156	0	promoter_flanking_region
chr13_96	rs2760346	rs6311,rs36213156	0	promoter_flanking_region
chr13_96	rs138907887	rs6311,rs36213156	0	promoter_flanking_region
chr13_96	rs2760347	rs6311,rs36213156	0	promoter_flanking_region
chr13_96	rs4941570	rs6311,rs36213156	0	promoter_flanking_region
chr13_96	rs2770294	rs6311,rs36213156	0	promoter_flanking_region
chr13_96	rs6561336	rs6311,rs36213156	0	enhancer
chr13_96	rs6313	rs6311,rs36213156	0	promoter
chr13_96	rs6311	rs6311,rs36213156	1	promoter
chr13_97	rs116028603	rs9522338,rs9515467	0	promoter_flanking_region
chr13_97	rs9588482	rs9522338,rs9515467	0	CTCF_binding_site
chr13_97	rs67593292	rs9522338,rs9515467	0	enhancer
chr13_97	rs7329245	rs9522338,rs9515467	0	enhancer
chr13_97	rs188751758	rs9522338,rs9515467	0	enhancer
chr13_97	rs73573423	rs9522338,rs9515467	0	promoter_flanking_region
chr14_98	rs2075487	rs80268079,rs12888908	0	CTCF_binding_site
chr14_98	rs12323576	rs80268079,rs12888908	0	enhancer
chr14_98	rs57440372	rs80268079,rs12888908	0	enhancer
chr14_98	rs4429208	rs80268079,rs12888908	0	CTCF_binding_site
chr14_98	rs7155867	rs80268079,rs12888908	0	promoter_flanking_region
chr14_98	rs12897433	rs80268079,rs12888908	0	promoter_flanking_region
chr14_98	rs34432845	rs80268079,rs12888908	0	promoter_flanking_region
chr14_98	rs35372754	rs80268079,rs12888908	0	promoter
chr14_98	rs71412056	rs80268079,rs12888908	0	promoter
chr14_98	rs71412056	rs80268079,rs12888908	0	CTCF_binding_site
chr14_98	rs33959352	rs80268079,rs12888908	0	CTCF_binding_site
chr14_98	rs33959352	rs80268079,rs12888908	0	promoter
chr14_98	rs71412057	rs80268079,rs12888908	0	promoter
chr14_98	rs34902550	rs80268079,rs12888908	0	promoter
chr14_98	rs35012626	rs80268079,rs12888908	0	promoter
chr14_98	rs1014477	rs80268079,rs12888908	0	promoter
chr14_98	rs66543873	rs80268079,rs12888908	0	promoter
chr14_98	rs59599784	rs80268079,rs12888908	0	promoter
chr14_98	rs58150830	rs80268079,rs12888908	0	promoter
chr14_98	rs2272541	rs80268079,rs12888908	0	promoter
chr14_98	rs2272542	rs80268079,rs12888908	0	promoter
chr14_98	rs2272543	rs80268079,rs12888908	0	promoter
chr14_98	rs2272544	rs80268079,rs12888908	0	promoter
chr14_98	rs12892366	rs80268079,rs12888908	0	CTCF_binding_site
chr14_98	rs12892366	rs80268079,rs12888908	0	promoter
chr14_98	rs2272545	rs80268079,rs12888908	0	CTCF_binding_site
chr14_98	rs2272545	rs80268079,rs12888908	0	promoter
chr14_98	rs2272546	rs80268079,rs12888908	0	CTCF_binding_site
chr14_98	rs2272546	rs80268079,rs12888908	0	promoter
chr14_98	rs141812502	rs80268079,rs12888908	0	CTCF_binding_site
chr14_98	rs141812502	rs80268079,rs12888908	0	promoter
chr14_98	rs79521544	rs80268079,rs12888908	0	CTCF_binding_site
chr14_98	rs79521544	rs80268079,rs12888908	0	promoter
chr14_98	rs2072608	rs80268079,rs12888908	0	CTCF_binding_site
chr14_98	rs2072608	rs80268079,rs12888908	0	promoter
chr14_98	rs2017224	rs80268079,rs12888908	0	CTCF_binding_site
chr14_98	rs2017224	rs80268079,rs12888908	0	promoter
chr14_98	rs2017263	rs80268079,rs12888908	0	CTCF_binding_site
chr14_98	rs2017263	rs80268079,rs12888908	0	promoter
chr14_98	rs2017432	rs80268079,rs12888908	0	CTCF_binding_site
chr14_98	rs2017432	rs80268079,rs12888908	0	promoter
chr14_98	rs2072609	rs80268079,rs12888908	0	CTCF_binding_site
chr14_98	rs2072609	rs80268079,rs12888908	0	promoter
chr14_98	rs80268079	rs80268079,rs12888908	1	CTCF_binding_site
chr14_98	rs80268079	rs80268079,rs12888908	1	promoter
chr14_98	rs12878351	rs80268079,rs12888908	0	CTCF_binding_site
chr14_98	rs12878351	rs80268079,rs12888908	0	promoter
chr14_98	rs12878478	rs80268079,rs12888908	0	promoter
chr14_98	rs12878494	rs80268079,rs12888908	0	promoter
chr14_98	rs12892925	rs80268079,rs12888908	0	promoter
chr14_98	rs760000	rs80268079,rs12888908	0	promoter
chr14_98	rs760001	rs80268079,rs12888908	0	promoter
chr14_98	rs760002	rs80268079,rs12888908	0	promoter
chr14_98	rs760003	rs80268079,rs12888908	0	promoter
chr14_98	rs11626323	rs80268079,rs12888908	0	promoter
chr14_98	rs11629404	rs80268079,rs12888908	0	promoter
chr14_98	rs11629446	rs80268079,rs12888908	0	promoter
chr14_98	rs11620886	rs80268079,rs12888908	0	promoter
chr14_98	rs12878216	rs80268079,rs12888908	0	promoter
chr14_98	rs12879611	rs80268079,rs12888908	0	promoter
chr14_98	rs12884453	rs80268079,rs12888908	0	promoter
chr14_98	rs12882572	rs80268079,rs12888908	0	promoter
chr14_98	rs12888908	rs80268079,rs12888908	1	promoter
chr14_98	rs66805366	rs80268079,rs12888908	0	promoter
chr14_98	rs8015464	rs80268079,rs12888908	0	promoter
chr14_98	rs8019485	rs80268079,rs12888908	0	promoter
chr14_98	rs8013555	rs80268079,rs12888908	0	promoter
chr14_98	rs2204936	rs80268079,rs12888908	0	promoter
chr14_98	rs2204937	rs80268079,rs12888908	0	promoter
chr14_98	rs2204938	rs80268079,rs12888908	0	promoter
chr14_98	rs2222917	rs80268079,rs12888908	0	promoter
chr14_98	rs5807096	rs80268079,rs12888908	0	promoter
chr14_98	rs10483259	rs80268079,rs12888908	0	promoter
chr14_98	rs71412058	rs80268079,rs12888908	0	promoter
chr14_98	rs7157659	rs80268079,rs12888908	0	promoter
chr14_98	rs7159790	rs80268079,rs12888908	0	promoter
chr14_98	rs28615547	rs80268079,rs12888908	0	promoter
chr14_98	rs956163	rs80268079,rs12888908	0	promoter
chr14_98	rs12887095	rs80268079,rs12888908	0	promoter
chr14_98	rs2320063	rs80268079,rs12888908	0	promoter
chr14_98	rs909073	rs80268079,rs12888908	0	CTCF_binding_site
chr14_98	rs909073	rs80268079,rs12888908	0	promoter
chr14_99	rs112863842	rs112497148,rs35127432	0	promoter_flanking_region
chr14_99	rs76726635	rs112497148,rs35127432	0	promoter_flanking_region
chr14_99	rs76881947	rs112497148,rs35127432	0	promoter_flanking_region
chr14_99	rs112917555	rs112497148,rs35127432	0	promoter_flanking_region
chr14_99	rs111784921	rs112497148,rs35127432	0	promoter_flanking_region
chr14_99	rs78244449	rs112497148,rs35127432	0	promoter_flanking_region
chr14_99	rs111617836	rs112497148,rs35127432	0	promoter_flanking_region
chr14_99	rs111557241	rs112497148,rs35127432	0	promoter_flanking_region
chr14_100	rs17119051	rs1887944,rs7147645	0	promoter_flanking_region
chr14_101	rs12147060	rs181594833,rs11844162	0	enhancer
chr14_101	rs11329581	rs181594833,rs11844162	0	open_chromatin_region
chr14_102	rs1950277	rs34344322,rs11626207	0	promoter_flanking_region
chr14_102	rs1950278	rs34344322,rs11626207	0	promoter_flanking_region
chr14_102	rs35881804	rs34344322,rs11626207	0	promoter_flanking_region
chr14_102	rs34671411	rs34344322,rs11626207	0	promoter_flanking_region
chr14_102	rs34182675	rs34344322,rs11626207	0	promoter_flanking_region
chr14_102	rs34344322	rs34344322,rs11626207	1	promoter_flanking_region
chr14_102	rs34132020	rs34344322,rs11626207	0	promoter_flanking_region
chr14_102	rs1569803	rs34344322,rs11626207	0	promoter_flanking_region
chr14_102	rs1569804	rs34344322,rs11626207	0	promoter_flanking_region
chr14_102	rs12897983	rs34344322,rs11626207	0	promoter_flanking_region
chr14_102	rs2223933	rs34344322,rs11626207	0	promoter_flanking_region
chr14_102	rs1950279	rs34344322,rs11626207	0	promoter_flanking_region
chr14_102	rs12883876	rs34344322,rs11626207	0	promoter_flanking_region
chr14_102	rs34603307	rs34344322,rs11626207	0	promoter_flanking_region
chr14_102	rs11626207	rs34344322,rs11626207	1	promoter_flanking_region
chr14_102	rs11626469	rs34344322,rs11626207	0	promoter_flanking_region
chr14_102	rs11159854	rs34344322,rs11626207	0	promoter_flanking_region
chr14_102	rs11159855	rs34344322,rs11626207	0	promoter_flanking_region
chr14_102	rs12147159	rs34344322,rs11626207	0	enhancer
chr14_102	rs12147715	rs34344322,rs11626207	0	enhancer
chr15_103	rs285712	rs8032832,rs6496963	0	promoter_flanking_region
chr15_103	rs410363	rs8032832,rs6496963	0	enhancer
chr15_103	rs35936633	rs8032832,rs6496963	0	enhancer
chr15_103	rs432364	rs8032832,rs6496963	0	promoter_flanking_region
chr15_103	rs8030062	rs8032832,rs6496963	0	promoter_flanking_region
chr15_103	rs8032683	rs8032832,rs6496963	0	promoter_flanking_region
chr15_103	rs8032832	rs8032832,rs6496963	1	promoter_flanking_region
chr15_103	rs6496962	rs8032832,rs6496963	0	promoter_flanking_region
chr15_103	rs6496963	rs8032832,rs6496963	1	promoter_flanking_region
chr15_103	rs6496964	rs8032832,rs6496963	0	promoter_flanking_region
chr15_103	rs8035858	rs8032832,rs6496963	0	promoter_flanking_region
chr15_103	rs28664631	rs8032832,rs6496963	0	promoter_flanking_region
chr15_103	rs28497802	rs8032832,rs6496963	0	promoter_flanking_region
chr15_103	rs8042515	rs8032832,rs6496963	0	promoter_flanking_region
chr15_103	rs17523840	rs8032832,rs6496963	0	promoter_flanking_region
chr15_103	rs8041521	rs8032832,rs6496963	0	promoter_flanking_region
chr15_103	rs8043510	rs8032832,rs6496963	0	promoter_flanking_region
chr15_103	rs8042357	rs8032832,rs6496963	0	promoter_flanking_region
chr15_103	rs11552662	rs8032832,rs6496963	0	promoter_flanking_region
chr16_105	rs13336816	rs7185367,rs9930278	0	enhancer
chr16_105	rs13336816	rs7185367,rs9930278	0	CTCF_binding_site
chr16_105	rs4984957	rs7185367,rs9930278	0	enhancer
chr16_105	rs4984957	rs7185367,rs9930278	0	CTCF_binding_site
chr16_105	rs4984704	rs7185367,rs9930278	0	enhancer
chr16_105	rs4984704	rs7185367,rs9930278	0	CTCF_binding_site
chr16_105	rs11864203	rs7185367,rs9930278	0	TF_binding_site
chr16_105	rs4984708	rs7185367,rs9930278	0	CTCF_binding_site
chr16_105	rs4984709	rs7185367,rs9930278	0	CTCF_binding_site
chr16_105	rs4984713	rs7185367,rs9930278	0	CTCF_binding_site
chr16_105	rs4984714	rs7185367,rs9930278	0	CTCF_binding_site
chr16_105	rs34038120	rs7185367,rs9930278	0	CTCF_binding_site
chr16_105	rs35805425	rs7185367,rs9930278	0	CTCF_binding_site
chr16_105	rs11865185	rs7185367,rs9930278	0	enhancer
chr16_105	rs11862655	rs7185367,rs9930278	0	enhancer
chr16_107	rs79521770	rs9933768,rs57790054	0	enhancer
chr16_107	rs79521770	rs9933768,rs57790054	0	CTCF_binding_site
chr16_107	rs74011247	rs9933768,rs57790054	0	CTCF_binding_site
chr16_107	rs13338055	rs9933768,rs57790054	0	CTCF_binding_site
chr16_107	rs117293173	rs9933768,rs57790054	0	CTCF_binding_site
chr16_107	rs149335399	rs9933768,rs57790054	0	CTCF_binding_site
chr16_107	rs2125150	rs9933768,rs57790054	0	enhancer
chr16_108	rs4889243	rs12597420,rs12918619	0	TF_binding_site
chr16_108	rs4889243	rs12597420,rs12918619	0	CTCF_binding_site
chr16_108	rs77104177	rs12597420,rs12918619	0	TF_binding_site
chr16_108	rs77104177	rs12597420,rs12918619	0	CTCF_binding_site
chr16_108	rs12918619	rs12597420,rs12918619	1	CTCF_binding_site
chr16_108	rs28670519	rs12597420,rs12918619	0	CTCF_binding_site
chr17_109	rs148258645	rs79333236,rs35922062	0	CTCF_binding_site
chr17_110	rs11078267	rs2083261,rs1561432	0	enhancer
chr17_110	rs1866428	rs2083261,rs1561432	0	enhancer
chr17_110	rs1866430	rs2083261,rs1561432	0	enhancer
chr17_110	rs2196790	rs2083261,rs1561432	0	enhancer
chr17_110	rs5819491	rs2083261,rs1561432	0	enhancer
chr17_110	rs1866431	rs2083261,rs1561432	0	enhancer
chr17_110	rs2118808	rs2083261,rs1561432	0	enhancer
chr17_110	rs1561429	rs2083261,rs1561432	0	enhancer
chr17_110	rs1561430	rs2083261,rs1561432	0	enhancer
chr17_110	rs1561431	rs2083261,rs1561432	0	enhancer
chr17_110	rs1561432	rs2083261,rs1561432	1	enhancer
chr17_110	rs1000911	rs2083261,rs1561432	0	enhancer
chr17_110	rs8068671	rs2083261,rs1561432	0	enhancer
chr17_110	rs1561433	rs2083261,rs1561432	0	CTCF_binding_site
chr17_110	rs1561434	rs2083261,rs1561432	0	CTCF_binding_site
chr18_112	rs12327050	rs77856737,rs116783429	0	promoter_flanking_region
chr18_112	rs77452043	rs77856737,rs116783429	0	promoter_flanking_region
chr18_112	rs145985985	rs77856737,rs116783429	0	promoter_flanking_region
chr18_112	rs78536098	rs77856737,rs116783429	0	enhancer
chr18_112	rs78536098	rs77856737,rs116783429	0	CTCF_binding_site
chr18_112	rs17090470	rs77856737,rs116783429	0	open_chromatin_region
chr18_112	rs77900731	rs77856737,rs116783429	0	open_chromatin_region
chr18_113	rs7232559	rs1893789,rs183926463	0	CTCF_binding_site
chr18_113	rs7232559	rs1893789,rs183926463	0	open_chromatin_region
chr18_114	rs7236791	rs111966697,rs112239568	0	promoter_flanking_region
chr18_114	rs7236990	rs111966697,rs112239568	0	promoter_flanking_region
chr18_114	rs76649441	rs111966697,rs112239568	0	CTCF_binding_site
chr18_114	rs371060342	rs111966697,rs112239568	0	CTCF_binding_site
chr18_114	rs76896061	rs111966697,rs112239568	0	CTCF_binding_site
chr18_114	rs116217560	rs111966697,rs112239568	0	open_chromatin_region
chr19_116	rs16979634	rs73517823,rs28374604	0	open_chromatin_region
chr19_116	rs28533737	rs73517823,rs28374604	0	open_chromatin_region
chr19_116	rs8108638	rs73517823,rs28374604	0	enhancer
chr19_116	rs73517819	rs73517823,rs28374604	0	CTCF_binding_site
chr19_116	rs74937637	rs73517823,rs28374604	0	CTCF_binding_site
chr19_116	rs145655931	rs73517823,rs28374604	0	promoter
chr19_117	rs3730926	rs8104114,rs166683	0	enhancer
chr19_117	rs8104114	rs8104114,rs166683	1	open_chromatin_region
chr19_115	rs10418788	rs10418794,rs79928909	0	CTCF_binding_site
chr19_115	rs10418794	rs10418794,rs79928909	1	CTCF_binding_site
chr19_115	rs79928909	rs10418794,rs79928909	1	promoter
chr20_118	rs6076821	rs1028554,rs4815797,rs6085129	0	open_chromatin_region
chr20_119	rs74557810	rs79400666,rs76787503	0	CTCF_binding_site
chr20_119	rs74557810	rs79400666,rs76787503	0	open_chromatin_region
chr20_119	rs7265870	rs79400666,rs76787503	0	CTCF_binding_site
chr20_119	rs7265870	rs79400666,rs76787503	0	TF_binding_site
chr20_119	rs79420938	rs79400666,rs76787503	0	promoter_flanking_region
chr20_120	rs4809937	rs6097587,rs76658991	0	TF_binding_site
chr20_120	rs6022774	rs6097587,rs76658991	0	promoter_flanking_region
chr20_121	rs6062862	rs6062838,rs116543719	0	CTCF_binding_site
chr21_122	rs2826420	rs11910781,rs60242158	0	CTCF_binding_site
chr21_122	rs9636678	rs11910781,rs60242158	0	enhancer
chr21_122	rs9637104	rs11910781,rs60242158	0	enhancer
chr21_122	rs9636679	rs11910781,rs60242158	0	enhancer
chr21_122	rs9636680	rs11910781,rs60242158	0	enhancer
chr21_122	rs35840763	rs11910781,rs60242158	0	enhancer
chr21_123	rs73905032	rs55771314,rs2837774	0	TF_binding_site
chr21_123	rs2837774	rs55771314,rs2837774	1	enhancer
chr21_123	rs9976172	rs55771314,rs2837774	0	open_chromatin_region
chr21_123	rs9976262	rs55771314,rs2837774	0	open_chromatin_region
chr21_123	rs9976323	rs55771314,rs2837774	0	open_chromatin_region
chr21_123	rs9976496	rs55771314,rs2837774	0	open_chromatin_region
chr21_123	rs59291497	rs55771314,rs2837774	0	open_chromatin_region
chr21_123	rs59673426	rs55771314,rs2837774	0	open_chromatin_region
chr21_123	rs73220286	rs55771314,rs2837774	0	open_chromatin_region
chr21_123	rs55772235	rs55771314,rs2837774	0	open_chromatin_region
chr22_124	rs739178	rs739178,rs9626245	1	open_chromatin_region
chr22_124	rs4823259	rs739178,rs9626245	0	CTCF_binding_site
chr22_124	rs148862791	rs739178,rs9626245	0	TF_binding_site
chr22_124	rs77662727	rs739178,rs9626245	0	TF_binding_site
chr22_124	rs5766038	rs739178,rs9626245	0	open_chromatin_region
chr22_124	rs5765026	rs739178,rs9626245	0	open_chromatin_region
chr22_124	rs1076933	rs739178,rs9626245	0	CTCF_binding_site
chr22_124	rs2349853	rs739178,rs9626245	0	CTCF_binding_site
chr22_124	rs5845673	rs739178,rs9626245	0	CTCF_binding_site
chr22_124	rs5766046	rs739178,rs9626245	0	promoter_flanking_region

## Sheet: STable2
STable 2. SNPs with associations in the GWAS Catalog (November 2020 version)
Region	RSID	TSP_SNP	TSP	Mapped_Gene	Phenotype	Category	PVAL	OR_BETA
chr4_39	rs4323050	rs36083417,rs35230778,rs67600034,rs66717029,rs35556180,rs5016158,rs4257605,rs13143879	0	AC107223.1	High light scatter reticulocyte percentage of red cells	Immunological and blood	1e-59	0.0631494
chr4_39	rs13101482	rs36083417,rs35230778,rs67600034,rs66717029,rs35556180,rs5016158,rs4257605,rs13143879	0	AC107223.1	Reticulocyte fraction of red cells	Immunological and blood	1e-46	0.0558597
chr4_39	rs1822841	rs36083417,rs35230778,rs67600034,rs66717029,rs35556180,rs5016158,rs4257605,rs13143879	0	AC107223.1	Red cell distribution width	Immunological and blood	4e-45	0.029151
chr4_39	rs13101482	rs36083417,rs35230778,rs67600034,rs66717029,rs35556180,rs5016158,rs4257605,rs13143879	0	AC107223.1	Reticulocyte count	Immunological and blood	9e-43	0.0534297
chr4_39	rs1822841	rs36083417,rs35230778,rs67600034,rs66717029,rs35556180,rs5016158,rs4257605,rs13143879	0	AC107223.1	Red cell distribution width	Immunological and blood	3e-42	NaN
chr4_39	rs4835473	rs36083417,rs35230778,rs67600034,rs66717029,rs35556180,rs5016158,rs4257605,rs13143879	0	AC107223.1	Immature fraction of reticulocytes	Immunological and blood	1e-41	0.051901
chr4_39	rs7666297	rs36083417,rs35230778,rs67600034,rs66717029,rs35556180,rs5016158,rs4257605,rs13143879	0	AC107223.1,_GYPB	Red cell distribution width	Immunological and blood	4e-33	NaN
chr8_64	rs2943539	rs1839333,rs1913638	0	HNF4G_-_AC011029.1	Urate levels	Uric acid	6e-28	0.04144
chr9_70	rs1333634	rs1333635,rs1460834	0	SYK	Platelet count	Immunological and blood	5e-26	NaN
chr9_70	rs1333634	rs1333635,rs1460834	0	SYK	Platelet count	Immunological and blood	2e-24	0.018717
chr4_39	rs4835097	rs36083417,rs35230778,rs67600034,rs66717029,rs35556180,rs5016158,rs4257605,rs13143879	0	AC107223.1	Blood protein levels	Immunological and blood	8e-23	0.27
chr8_64	rs2941484	rs1839333,rs1913638	0	HNF4G	Urate levels	Uric acid	8e-22	0.049
chr8_64	rs2941484	rs1839333,rs1913638	0	HNF4G	Serum uric acid levels	Uric acid	1e-20	0.0375
chr8_64	rs2941484	rs1839333,rs1913638	0	HNF4G	Serum uric acid levels	Uric acid	5e-19	0.035
chr8_64	rs1515020	rs1839333,rs1913638	0	HNF4G	Hematocrit	Immunological and blood	3e-18	NaN
chr8_64	rs2941484	rs1839333,rs1913638	0	HNF4G	Urate levels	Uric acid	4e-17	0.044
chr8_64	rs2941488	rs1839333,rs1913638	0	HNF4G_-_AC011029.1	Hematocrit	Immunological and blood	1e-16	0.015315
chr3_29	rs4241484	rs9880740,rs35592194	0	LINC00578	Cortical surface area (MOSTest)	Neurological measures	4e-16	NaN
chr4_39	rs13134327	rs36083417,rs35230778,rs67600034,rs66717029,rs35556180,rs5016158,rs4257605,rs13143879	0	AC107223.1	Glycated hemoglobin levels	Immunological and blood	3e-15	0.0131
chr8_64	rs1515020	rs1839333,rs1913638	0	HNF4G	Hemoglobin concentration	Immunological and blood	8e-15	NaN
chr2_18	rs17229285	rs13426764,rs11694806	0	AC019330.1	Ulcerative colitis	Chronic inflammatory diseases	3e-14	1.1
chr2_18	rs17229285	rs13426764,rs11694806	0	AC019330.1	Ulcerative colitis	Chronic inflammatory diseases	2e-13	1.117
chr8_64	rs1515020	rs1839333,rs1913638	0	HNF4G	Red blood cell count	Immunological and blood	3e-13	NaN
chr9_70	rs290268	rs1333635,rs1460834	0	OR7E108P_-_SYK	Mean platelet volume	Immunological and blood	2e-12	0.013565
chr2_18	rs17229285	rs13426764,rs11694806	0	AC019330.1	Smoking initiation (ever regular vs never regular) (MTAG)	Alcohol & Smoking	3e-12	0.00753834
chr8_64	rs2941488	rs1839333,rs1913638	0	HNF4G_-_AC011029.1	Red blood cell count	Immunological and blood	5e-12	0.012802
chr9_70	rs290268	rs1333635,rs1460834	0	OR7E108P_-_SYK	Mean platelet volume	Immunological and blood	2e-11	NaN
chr9_70	rs2780701	rs1333635,rs1460834	0	SYK	Platelet distribution width	Immunological and blood	2e-11	0.0243141
chr8_64	rs2941428	rs1839333,rs1913638	0	HNF4G_-_AC011029.1	Body mass index	Impedance measures	3e-11	NaN
chr16_107	rs67501351	rs9933768,rs57790054	0	GPRC5B_-_GPR139	Insomnia	Sleep quality	5e-11	1.046
chr2_18	rs1878668	rs13426764,rs11694806	0	AC019330.1	Household income (MTAG)	Household income	6e-11	0.0132436
chr2_18	rs6434978	rs13426764,rs11694806	0	AC019330.1	Chronic inflammatory diseases (ankylosing spondylitis, Crohn's disease, psoriasis, primary sclerosing cholangitis, ulcerative colitis) (pleiotropy)	Chronic inflammatory diseases	1e-10	NaN
chr3_28	rs2885198	rs9869178,rs2118072	0	AC107421.1_-_DIPK2A	Educational attainment (MTAG)	Educational attainment	1e-10	0.0084
chr11_86	rs2848479	rs2249268,rs60427879	0	AP001317.1_-_AP003038.1	Behcet's disease	Chronic inflammatory diseases	3e-10	1.66
chr3_28	rs2164552	rs9869178,rs2118072	0	AC107421.1_-_DIPK2A	Highest math class taken (MTAG)	Educational attainment	3e-10	0.0105
chr3_28	rs2164553	rs9869178,rs2118072	0	AC107421.1_-_DIPK2A	Self-reported math ability (MTAG)	Educational attainment	3e-10	0.0114
chr3_28	rs2885198	rs9869178,rs2118072	0	AC107421.1_-_DIPK2A	Educational attainment (years of education)	Educational attainment	5e-10	0.0088
chr8_61	rs763553	rs7006706,rs9792249	0	AC090816.1_-_RNA5SP261	Educational attainment (years of education)	Educational attainment	6e-10	0.0087
chr8_64	rs2941471	rs1839333,rs1913638	0	HNF4G	Pancreatic cancer	Neoplasms	7e-10	1.1236
chr2_18	rs12693854	rs13426764,rs11694806	0	AC019330.1	Intelligence (MTAG)	Cognition	8e-10	0.0181256
chr2_18	rs17229285	rs13426764,rs11694806	0	AC019330.1	Smoking initiation (ever regular vs never regular)	Alcohol & Smoking	1e-09	0.0154796
chr12_90	rs1795379	rs1480001,rs17115323	0	KRR1_-_AC078923.1	Polycystic ovary syndrome	Reproduction	2e-09	0.1174
chr2_18	rs114125694	rs13426764,rs11694806	0	AC019330.1	Cognitive performance	Cognition	2e-09	0.0172
chr9_70	rs290268	rs1333635,rs1460834	0	OR7E108P_-_SYK	Platelet count	Immunological and blood	2e-09	0.021989
chr14_100	rs10149448	rs1887944,rs7147645	0	RNU6ATAC28P_-_AL161713.1	Morning person	Chronotype	5e-09	NaN
chr2_18	rs1455344	rs13426764,rs11694806	0	AC019330.1	Intelligence	Cognition	5e-09	5.841
chr3_28	rs2885198	rs9869178,rs2118072	0	AC107421.1_-_DIPK2A	Cognitive performance (MTAG)	Cognition	5e-09	0.0135
chr3_29	rs1875102	rs9880740,rs35592194	0	LINC00578,_AC026355.3	Cortical surface area (min-P)	Neurological measures	9e-09	NaN
chr2_18	rs992005	rs13426764,rs11694806	0	AC019330.1	Cognitive ability (MTAG)	Cognition	1e-08	5.727
chr3_28	rs7643341	rs9869178,rs2118072	0	DIPK2A	Automobile speeding propensity	Risky behavior	1e-08	0.0129975
chr2_18	rs11687833	rs13426764,rs11694806	0	AC019330.1	Experiencing mood swings	Psychiatric traits	2e-08	5.61
chr2_18	rs1455343	rs13426764,rs11694806	0	AC019330.1	Mental health study participation (provided email address)	Psychiatric traits	2e-08	0.0062868
chr2_18	rs1356493	rs13426764,rs11694806	0	AC019330.1	Worry/vulnerability (special factor of neuroticism)	Psychiatric traits	3e-08	0.007524
chr3_29	rs1875102	rs9880740,rs35592194	0	LINC00578,_AC026355.3	Brain morphology (min-P)	Neurological measures	3e-08	NaN
chr2_22	rs7605872	rs10166264,rs59043333,rs72994757	0	OTOS_-_AC124861.4	Gut microbiota (bacterial taxa)	Gut microbiota	4e-08	5.50639
chr15_103	rs285712	rs8032832,rs6496963	0	AC091544.2	Gut microbiota relative abundance (bacterial taxa)	Gut microbiota	5e-08	0.481
chr16_107	rs72771074	rs9933768,rs57790054	0	GPRC5B_-_GPR139	Alcohol use disorder (consumption score)	Alcohol & Smoking	5e-08	0.007
chr2_18	rs1455335	rs13426764,rs11694806	0	AC019330.1	Smoking status	Alcohol & Smoking	5e-08	NaN
chr3_29	rs6766914	rs9880740,rs35592194	0	LINC00578	White matter microstructure (mode of anisotropy)	Neurological measures	5e-08	NaN
chr8_64	rs1913641	rs1839333,rs1913638	0	HNF4G_-_AC011029.1	Estimated glomerular filtration rate	Kidney function	5e-08	0.0018
chr8_64	rs1913641	rs1839333,rs1913638	0	HNF4G_-_AC011029.1	Estimated glomerular filtration rate	Kidney function	7e-08	0.002
chr2_18	rs9973442	rs13426764,rs11694806	0	AC019330.1	General cognitive ability	Cognition	8e-08	5.37
chr3_28	rs2885198	rs9869178,rs2118072	0	AC107421.1_-_DIPK2A	Educational attainment (years of education)	Educational attainment	1e-07	NaN
chr7_59	rs757278	rs10234869,rs76607522	0	CTTNBP2	Response to methotrexate in juvenile idiopathic arthritis	Skeletal	5e-07	1.32
chr8_66	rs16886173	rs6469547,rs78745861	0	AC025881.1_-_CARS1P2	Urate levels (BMI interaction)	Uric acid	7e-07	0.028951
chr2_18	rs17229285	rs13426764,rs11694806	0	AC019330.1	Inflammatory bowel disease	Chronic inflammatory diseases	8e-07	1.05058
chr4_37	rs4286604	rs2017370,rs1432327	0	AC093829.1	Epithelial ovarian cancer	Neoplasms	9e-07	1.44928
chr1_2	rs506546	rs531066,rs6677026	0	CSMD2	Response to serotonin reuptake inhibitors in major depressive disorder	Psychiatric traits	1e-06	1.32
chr2_17	rs75904417	rs59901332,rs10196543	0	CTAGE14P_-_B3GALT1-AS1	Interleukin-7 levels	Immunological and blood	1e-06	0.1698
chr4_37	rs10017134	rs2017370,rs1432327	0	UGT2A1,_UGT2A2	Epithelial ovarian cancer	Neoplasms	1e-06	1.4
chr10_77	rs1480597	rs7091495,rs10793555	0	AL356157.1_-_TMEM72-AS1	Parkinson's disease	Neurodegenerative diseases	2e-06	2.5
chr9_71	rs10816533	rs10978973,rs10117921	0	ZNF510	Height	Skeletal	2e-06	NaN
chr1_3	rs7531932	rs11209813,rs2422014	0	NEGR1	Schizophrenia	Neurodegenerative diseases	4e-06	1.05
chr4_37	rs10028954	rs2017370,rs1432327	0	UGT2A1,_UGT2A2	Cerebrospinal fluid sTREM-2 levels	Neurological measures	4e-06	672.479
chr10_77	rs1325163	rs7091495,rs10793555	0	AL356157.1_-_TMEM72-AS1	Chickenpox	Viral diseases	5e-06	0.0747
chr11_86	rs35342385	rs2249268,rs60427879	0	AP001317.1_-_AP003038.1	Idiopathic intracranial hypertension	Neurological measures	5e-06	NaN
chr3_24	rs9822411	rs1436251,rs9848513	0	RARB	Oppositional defiant disorder dimensions in attention-deficit hyperactivity disorder	Psychiatric traits	5e-06	NaN
chr4_32	rs79740699	rs78157989,rs79740699	1	LINC02261_-_IGBP1P5	Loneliness (multivariate analysis)	Psychiatric traits	6e-06	NaN
chr12_91	rs57146176	rs77368915,rs59624358	0	AC010196.1,_MGAT4C	Hepatocyte growth factor levels	Liver	7e-06	0.0942
chr13_96	rs731245	rs6311,rs36213156	0	HTR2A_-_GNG5P5	Maternal nondisjunction of chromosome 21 (MI error vs fathers)	Chromosomal abnormalities	7e-06	1.46
chr2_17	rs75904417	rs59901332,rs10196543	0	CTAGE14P_-_B3GALT1-AS1	Interleukin-13 levels	Immunological and blood	7e-06	0.1515
chr3_25	rs7623430	rs13078784,rs79152277	0	RFC3P1	Response to abacavir-containing treatment in HIV-1 infection (virologic failure)	Viral diseases	7e-06	3.03
chr6_53	rs13198547	rs2981973,rs61400956,rs13198547	1	UNC93A	Skin reflectance (Melanin index)	Skin	7e-06	0.255861
chr12_90	rs11180559	rs1480001,rs17115323	0	KRR1_-_AC078923.1	Daytime sleep phenotypes	Chronotype	8e-06	0.127

## Sheet: STable3
STable 3. SNPs with associatoins in the geneAtlas UKBiobank database
Region	RSID	TraitID	Trait	Category	iscores	NBETA	NSE	PV
chr4_39	rs13143879	30290-0.0	High light scatter reticulocyte percentage	Immunological and blood	0.9998	-0.008633	0.00038	2.02e-114
chr4_39	rs4257605	30290-0.0	High light scatter reticulocyte percentage	Immunological and blood	0.9999	-0.008632	0.00038	2.12e-114
chr4_39	rs35556180	30290-0.0	High light scatter reticulocyte percentage	Immunological and blood	0.9987	-0.008632	0.00038	3.47e-114
chr4_39	rs35230778	30290-0.0	High light scatter reticulocyte percentage	Immunological and blood	0.9977	-0.008631	0.00038	5.1e-114
chr4_39	rs13143879	30300-0.0	High light scatter reticulocyte count	Immunological and blood	0.9998	-0.00038	1.7e-05	9.79e-111
chr4_39	rs4257605	30300-0.0	High light scatter reticulocyte count	Immunological and blood	0.9999	-0.00038	1.7e-05	1.04e-110
chr4_39	rs35556180	30300-0.0	High light scatter reticulocyte count	Immunological and blood	0.9987	-0.00038	1.7e-05	1.28e-110
chr4_39	rs35230778	30300-0.0	High light scatter reticulocyte count	Immunological and blood	0.9977	-0.00038	1.7e-05	2.12e-110
chr4_39	rs13143879	30240-0.0	Reticulocyte percentage	Immunological and blood	0.9998	-0.021624	0.00103	6.3e-98
chr4_39	rs4257605	30240-0.0	Reticulocyte percentage	Immunological and blood	0.9999	-0.021621	0.00103	6.68e-98
chr4_39	rs35556180	30240-0.0	Reticulocyte percentage	Immunological and blood	0.9987	-0.021637	0.00103	7.18e-98
chr4_39	rs35230778	30240-0.0	Reticulocyte percentage	Immunological and blood	0.9977	-0.021628	0.00103	1.16e-97
chr4_39	rs35556180	30250-0.0	Reticulocyte count	Immunological and blood	0.9987	-0.00093	4.68e-05	6.42e-88
chr4_39	rs13143879	30250-0.0	Reticulocyte count	Immunological and blood	0.9998	-0.000929	4.68e-05	6.99e-88
chr4_39	rs4257605	30250-0.0	Reticulocyte count	Immunological and blood	0.9999	-0.000929	4.68e-05	7.47e-88
chr4_39	rs35230778	30250-0.0	Reticulocyte count	Immunological and blood	0.9977	-0.00093	4.68e-05	1.17e-87
chr4_39	rs13143879	30280-0.0	Immature reticulocyte fraction	Immunological and blood	0.9998	-0.001989	0.000114	8.51e-68
chr4_39	rs4257605	30280-0.0	Immature reticulocyte fraction	Immunological and blood	0.9999	-0.001989	0.000114	8.88e-68
chr4_39	rs35230778	30280-0.0	Immature reticulocyte fraction	Immunological and blood	0.9977	-0.001988	0.000114	1.48e-67
chr4_39	rs35556180	30280-0.0	Immature reticulocyte fraction	Immunological and blood	0.9987	-0.001986	0.000114	1.72e-67
chr5_47	rs114944655	clinical_c_G25	Other extrapyramidal and movement disorders	Neurodegenerative diseases	0.924	0.29563	0.0195	1e-51
chr15_104	rs111445047	selfReported_n_1293	spinal injury	Skeletal problems	0.8081	0.31884	0.0222	8.47e-47
chr4_38	rs114383553	clinical_c_D86	Sarcoidosis	Chronic inflammatory diseases	0.9111	0.23798	0.0173	5.71e-43
chr15_104	rs111445047	clinical_c_Block_M40-M43	Deforming dorsopathies	Skeletal problems	0.8081	0.50846	0.0463	4.99e-28
chr4_38	rs114383553	selfReported_n_1414	sarcoidosis	Chronic inflammatory diseases	0.9111	0.22958	0.021	1.07e-27
chr9_70	rs1333635	30110-0.0	Platelet distribution width	Immunological and blood	0.9949	-0.008585	0.000856	1.12e-23
chr15_104	rs111445047	selfReported_n_1592	dry eyes	Eye and vision problems	0.8081	0.21077	0.0215	9.25e-23
chr4_38	rs114383553	clinical_c_Block_D80-D89	Certain disorders involving the immune mechanism	Immune mechanism disorders	0.9111	0.23633	0.0242	1.91e-22
chr2_22	rs10166264	clinical_c_J06	Acute upper respiratory infections of multiple and unspecified sites	Acute upper respiratory infections	0.9152	0.10313	0.0107	6.46e-22
chr4_39	rs4257605	30070-0.0	Red blood cell (erythrocyte) distribution width	Immunological and blood	0.9999	-0.016835	0.00176	1.25e-21
chr4_39	rs13143879	30070-0.0	Red blood cell (erythrocyte) distribution width	Immunological and blood	0.9998	-0.016836	0.00176	1.25e-21
chr4_39	rs35556180	30070-0.0	Red blood cell (erythrocyte) distribution width	Immunological and blood	0.9987	-0.016847	0.00176	1.27e-21
chr4_39	rs35230778	30070-0.0	Red blood cell (erythrocyte) distribution width	Immunological and blood	0.9977	-0.016795	0.00176	1.79e-21
chr9_70	rs1333635	30080-0.0	Platelet count	Immunological and blood	0.9949	0.83589	0.0915	6.45e-20
chr15_104	rs111445047	clinical_c_M43	Other deforming dorsopathies	Skeletal problems	0.8081	0.31641	0.0363	3.14e-18
chr5_47	rs114944655	clinical_c_Block_G20-G26	Extrapyramidal and movement disorders	Neurodegenerative diseases	0.924	0.28927	0.0349	1.05e-16
chr4_39	rs35230778	30040-0.0	Mean corpuscular volume	Immunological and blood	0.9977	-0.062689	0.00761	1.81e-16
chr4_39	rs35556180	30040-0.0	Mean corpuscular volume	Immunological and blood	0.9987	-0.062324	0.00761	2.58e-16
chr4_39	rs13143879	30040-0.0	Mean corpuscular volume	Immunological and blood	0.9998	-0.062262	0.0076	2.6e-16
chr4_39	rs4257605	30040-0.0	Mean corpuscular volume	Immunological and blood	0.9999	-0.062258	0.0076	2.61e-16
chr15_104	rs111445047	clinical_c_H50	Other strabismus	Eye and vision problems	0.8081	0.21169	0.0267	2.12e-15
chr15_104	rs111445047	clinical_c_Block_G30-G32	Other degenerative diseases of the nervous system	Neurodegenerative diseases	0.8081	0.21372	0.0275	8.29e-15
chr4_39	rs35230778	30050-0.0	Mean corpuscular haemoglobin	Immunological and blood	0.9977	-0.023785	0.00308	1.23e-14
chr4_39	rs35556180	30050-0.0	Mean corpuscular haemoglobin	Immunological and blood	0.9987	-0.023679	0.00308	1.54e-14
chr4_39	rs13143879	30050-0.0	Mean corpuscular haemoglobin	Immunological and blood	0.9998	-0.023656	0.00308	1.55e-14
chr4_39	rs4257605	30050-0.0	Mean corpuscular haemoglobin	Immunological and blood	0.9999	-0.023647	0.00308	1.58e-14
chr4_38	rs114383553	clinical_c_M70	Soft tissue disorders related to use overuse and pressure	Soft tissue disorders related to overuse	0.9111	0.2283	0.0301	3.37e-14
chr9_70	rs1333635	30100-0.0	Mean platelet (thrombocyte) volume	Immunological and blood	0.9949	-0.011772	0.00157	5.52e-14
chr15_104	rs111445047	selfReported_n_1266	neurological injury/trauma	Neurological injury/trauma	0.8081	0.30828	0.0419	1.87e-13
chr4_38	rs114383553	clinical_c_B34	Viral infection of unspecified site	Viral infections	0.9111	0.22861	0.0312	2.3e-13
chr10_77	rs10793555	30050-0.0	Mean corpuscular haemoglobin	Immunological and blood	0.9946	0.025449	0.00357	1.04e-12
chr10_77	rs10793555	30040-0.0	Mean corpuscular volume	Immunological and blood	0.9946	0.062546	0.00882	1.29e-12
chr4_39	rs35230778	30090-0.0	Platelet crit	Immunological and blood	0.9977	-0.000559	8.05e-05	3.72e-12
chr4_39	rs35556180	30090-0.0	Platelet crit	Immunological and blood	0.9987	-0.000558	8.04e-05	3.83e-12
chr4_39	rs4257605	30090-0.0	Platelet crit	Immunological and blood	0.9999	-0.000557	8.04e-05	4.2e-12
chr4_39	rs13143879	30090-0.0	Platelet crit	Immunological and blood	0.9998	-0.000557	8.04e-05	4.3e-12
chr4_39	rs35230778	50-0.0	Standing height	Skeletal	0.9977	-0.061629	0.00891	4.72e-12
chr4_38	rs114383553	clinical_c_Block_B25-B34	Other viral diseases	Viral diseases	0.9111	0.22682	0.0329	5.36e-12
chr3_24	rs1436251	23128-0.0	Trunk fat mass	Impedance measures	0.9921	-0.082019	0.0119	5.77e-12
chr8_64	rs1913638	23104-0.0	Body mass index (BMI)	Impedance measures	0.997	0.055964	0.00813	6e-12
chr4_39	rs4257605	50-0.0	Standing height	Skeletal	0.9999	-0.061052	0.0089	6.89e-12
chr4_39	rs13143879	50-0.0	Standing height	Skeletal	0.9998	-0.060986	0.0089	7.27e-12
chr4_39	rs35556180	50-0.0	Standing height	Skeletal	0.9987	-0.060922	0.00891	7.97e-12
chr8_64	rs1839333	23104-0.0	Body mass index (BMI)	Impedance measures	0.9983	0.056135	0.00821	7.99e-12
chr15_104	rs111445047	clinical_c_M41	Scoliosis	Scoliosis	0.8081	0.19304	0.0284	1.03e-11
chr15_104	rs111445047	clinical_c_K08	Other disorders of teeth and supporting structures	Disorders of teeth and supporting structures	0.8081	0.30588	0.0451	1.16e-11
chr2_18	rs13426764	864-0.0	Number of days/week walked 10+ minutes	Physical activity	0.9975	0.026078	0.00388	1.83e-11
chr15_104	rs111445047	clinical_c_B34	Viral infection of unspecified site	Viral infections	0.8081	0.24449	0.0366	2.26e-11
chr6_52	rs111481058	selfReported_n_1696	fracture head & neck	Fracture	0.908	0.063554	0.00952	2.43e-11
chr9_70	rs1333635	30130-0.0	Monocyte count	Immunological and blood	0.9949	0.001888	0.000283	2.52e-11
chr8_64	rs1913638	21001-0.0	Body mass index (BMI)	Impedance measures	0.997	0.054275	0.0082	3.57e-11
chr3_24	rs1436251	23098-0.0	Weight	Impedance measures	0.9921	-0.21103	0.0319	3.83e-11
chr8_64	rs1839333	21001-0.0	Body mass index (BMI)	Impedance measures	0.9983	0.054488	0.00827	4.48e-11
chr3_24	rs1436251	21002-0.0	Weight	Impedance measures	0.9921	-0.20906	0.0322	7.97e-11
chr8_64	rs1839333	23123-0.0	Arm fat percentage (left)	Impedance measures	0.9983	0.085666	0.0133	1.05e-10
chr4_38	rs114383553	clinical_c_I34	Nonrheumatic mitral valve disorders	Cardiac problems	0.9111	0.2309	0.0361	1.65e-10
chr2_18	rs11694806	864-0.0	Number of days/week walked 10+ minutes	Physical activity	0.9973	0.024746	0.00388	1.73e-10
chr4_38	rs114383553	selfReported_n_1454	other renal/kidney problem	Renal/kidney problems	0.9111	0.22571	0.0355	1.94e-10
chr8_64	rs1913638	23123-0.0	Arm fat percentage (left)	Impedance measures	0.997	0.083531	0.0131	2.07e-10
chr15_104	rs111445047	clinical_c_Block_B25-B34	Other viral diseases	Viral diseases	0.8081	0.24331	0.0385	2.76e-10
chr9_70	rs1333635	30090-0.0	Platelet crit	Immunological and blood	0.9949	0.000476	7.61e-05	4.06e-10
chr3_24	rs1436251	23100-0.0	Whole body fat mass	Impedance measures	0.9921	-0.1341	0.0215	4.07e-10
chr4_38	rs114383553	clinical_c_N28	Other disorders of kidney and ureter not elsewhere classified	Renal/kidney problems	0.9111	0.22731	0.0365	4.49e-10
chr15_104	rs111445047	clinical_c_K26	Duodenal ulcer	Duodenal ulcer	0.8081	0.30429	0.0488	4.56e-10
chr8_64	rs1913638	23124-0.0	Arm fat mass (left)	Impedance measures	0.997	0.007475	0.0012	4.57e-10
chr8_64	rs1913638	23120-0.0	Arm fat mass (right)	Impedance measures	0.997	0.006676	0.00107	5.06e-10
chr8_64	rs1913638	23116-0.0	Leg fat mass (left)	Impedance measures	0.997	0.016547	0.00267	6.17e-10
chr8_64	rs1839333	23124-0.0	Arm fat mass (left)	Impedance measures	0.9983	0.007435	0.00121	8.05e-10
chr8_64	rs1839333	23119-0.0	Arm fat percentage (right)	Impedance measures	0.9983	0.080771	0.0132	9.04e-10
chr8_64	rs1839333	23120-0.0	Arm fat mass (right)	Impedance measures	0.9983	0.006635	0.00108	9.19e-10
chr2_10	rs114431418	clinical_c_J92	Pleural plaque	Pleural plaque	0.8139	0.052099	0.00852	9.71e-10
chr4_39	rs35230778	30180-0.0	Lymphocyte percentage	Immunological and blood	0.9977	0.085398	0.014	1.01e-09
chr8_64	rs1913638	23119-0.0	Arm fat percentage (right)	Impedance measures	0.997	0.079659	0.0131	1.09e-09
chr4_39	rs13143879	30180-0.0	Lymphocyte percentage	Immunological and blood	0.9998	0.084837	0.014	1.22e-09
chr4_39	rs4257605	30180-0.0	Lymphocyte percentage	Immunological and blood	0.9999	0.084785	0.014	1.25e-09
chr4_39	rs35556180	30180-0.0	Lymphocyte percentage	Immunological and blood	0.9987	0.08458	0.014	1.42e-09
chr8_64	rs1913638	23100-0.0	Whole body fat mass	Impedance measures	0.997	0.096313	0.0159	1.54e-09
chr4_38	rs114383553	clinical_c_G45	Transient cerebral ischaemic attacks and related syndromes	Transient ischaemic attack	0.9111	0.22722	0.0377	1.63e-09
chr8_64	rs1913638	23112-0.0	Leg fat mass (right)	Impedance measures	0.997	0.016473	0.00274	1.74e-09
chr8_64	rs1913638	23115-0.0	Leg fat percentage (left)	Impedance measures	0.997	0.054605	0.00908	1.81e-09
chr8_64	rs1839333	23115-0.0	Leg fat percentage (left)	Impedance measures	0.9983	0.05493	0.00916	2.03e-09
chr2_22	rs10166264	selfReported_n_1305	eye trauma	Eye trauma	0.9152	0.053539	0.00895	2.25e-09
chr8_64	rs1839333	23116-0.0	Leg fat mass (left)	Impedance measures	0.9983	0.016101	0.0027	2.44e-09
chr15_104	rs111445047	clinical_c_K43	Ventral hernia	Ventral hernia	0.8081	0.30326	0.0509	2.48e-09
chr4_38	rs114383553	clinical_c_Block_N25-N29	Other disorders of kidney and ureter	Renal/kidney problems	0.9111	0.22657	0.0381	2.71e-09
chr2_10	rs114431418	clinical_c_M85	Other disorders of bone density and structure	Disorders of bone density and structure	0.8139	0.060706	0.0102	2.74e-09
chr7_58	rs113096256	clinical_c_I89	Other non-infective disorders of lymphatic vessels and lymph nodes	Disorders of lymphatic vessels and lymph nodes	0.885	0.015468	0.00261	2.94e-09
chr8_64	rs1839333	23100-0.0	Whole body fat mass	Impedance measures	0.9983	0.095103	0.0161	3.41e-09
chr8_64	rs1913638	23098-0.0	Weight	Impedance measures	0.997	0.13949	0.0237	4.07e-09
chr4_39	rs35556180	1697-0.0	Comparative height size at age 10	Skeletal	0.9987	-0.007146	0.00122	4.85e-09
chr4_39	rs35230778	20015-0.0	Sitting height	Skeletal	0.9977	-0.035268	0.00603	4.87e-09
chr4_39	rs35556180	20015-0.0	Sitting height	Skeletal	0.9987	-0.035059	0.00602	5.86e-09
chr8_64	rs1839333	23112-0.0	Leg fat mass (right)	Impedance measures	0.9983	0.016056	0.00276	6.07e-09
chr8_64	rs1839333	23099-0.0	Body fat percentage	Impedance measures	0.9983	0.064182	0.011	6.13e-09
chr4_39	rs4257605	20015-0.0	Sitting height	Skeletal	0.9999	-0.034926	0.00602	6.48e-09
chr4_39	rs13143879	20015-0.0	Sitting height	Skeletal	0.9998	-0.034901	0.00602	6.64e-09
chr3_24	rs1436251	23118-0.0	Leg predicted mass (left)	Impedance measures	0.9921	-0.014829	0.00256	6.68e-09
chr4_39	rs4257605	1697-0.0	Comparative height size at age 10	Skeletal	0.9999	-0.007071	0.00122	6.78e-09
chr4_39	rs13143879	1697-0.0	Comparative height size at age 10	Skeletal	0.9998	-0.007068	0.00122	6.88e-09
chr4_39	rs35230778	1697-0.0	Comparative height size at age 10	Skeletal	0.9977	-0.007063	0.00122	7.43e-09
chr5_47	rs114944655	clinical_c_J34	Other disorders of nose and nasal sinuses	Disorders of nose and nasal sinuses	0.924	0.36679	0.0635	7.54e-09
chr3_24	rs1436251	23117-0.0	Leg fat-free mass (left)	Impedance measures	0.9921	-0.015708	0.00273	8.36e-09
chr3_24	rs1436251	23105-0.0	Basal metabolic rate	Impedance measures	0.9921	-10.675	1.85	8.53e-09
chr8_64	rs1913638	23099-0.0	Body fat percentage	Impedance measures	0.997	0.062935	0.0109	8.81e-09
chr3_24	rs1436251	48-0.0	Waist circumference	Impedance measures	0.9921	-0.16393	0.0285	8.97e-09
chr3_24	rs1436251	23124-0.0	Arm fat mass (left)	Impedance measures	0.9921	-0.009251	0.00161	9.56e-09
chr3_24	rs1436251	23127-0.0	Trunk fat percentage	Impedance measures	0.9921	-0.096891	0.0169	1.08e-08
chr8_64	rs1913638	49-0.0	Hip circumference	Impedance measures	0.997	0.092442	0.0162	1.09e-08
chr8_64	rs1839333	23111-0.0	Leg fat percentage (right)	Impedance measures	0.9983	0.055078	0.00964	1.1e-08
chr8_64	rs1913638	21002-0.0	Weight	Impedance measures	0.997	0.13654	0.0239	1.1e-08
chr3_24	rs1436251	23114-0.0	Leg predicted mass (right)	Impedance measures	0.9921	-0.014531	0.00254	1.12e-08
chr4_39	rs35556180	30080-0.0	Platelet count	Immunological and blood	0.9987	-0.55261	0.0968	1.15e-08
chr8_64	rs1913638	48-0.0	Waist circumference	Impedance measures	0.997	0.12105	0.0212	1.16e-08
chr4_39	rs35230778	30080-0.0	Platelet count	Immunological and blood	0.9977	-0.55209	0.0969	1.21e-08
chr4_39	rs4257605	30080-0.0	Platelet count	Immunological and blood	0.9999	-0.55077	0.0967	1.24e-08
chr3_24	rs1436251	23113-0.0	Leg fat-free mass (right)	Impedance measures	0.9921	-0.015449	0.00271	1.25e-08
chr8_64	rs1913638	23111-0.0	Leg fat percentage (right)	Impedance measures	0.997	0.054374	0.00955	1.25e-08
chr4_39	rs13143879	30080-0.0	Platelet count	Immunological and blood	0.9998	-0.55055	0.0967	1.26e-08
chr3_24	rs1436251	23120-0.0	Arm fat mass (right)	Impedance measures	0.9921	-0.008212	0.00144	1.29e-08
chr3_24	rs1436251	50-0.0	Standing height	Skeletal	0.9921	-0.064145	0.0114	1.75e-08
chr8_64	rs1839333	23098-0.0	Weight	Impedance measures	0.9983	0.13453	0.0239	1.89e-08
chr10_77	rs10793555	30270-0.0	Mean sphered cell volume	Immunological and blood	0.9946	0.059391	0.0106	2.01e-08
chr7_57	rs10277941	clinical_c_M85	Other disorders of bone density and structure	Disorders of bone density and structure	0.8874	0.022742	0.00405	2.04e-08
chr8_64	rs1839333	49-0.0	Hip circumference	Impedance measures	0.9983	0.091283	0.0163	2.22e-08
chr8_64	rs1839333	48-0.0	Waist circumference	Impedance measures	0.9983	0.11752	0.0214	4.02e-08
chr2_18	rs13426764	20116-0.0	Smoking status	Alcohol & Smoking	0.9975	0.007115	0.0013	4.1e-08
chr8_64	rs1839333	21002-0.0	Weight	Impedance measures	0.9983	0.13201	0.0241	4.36e-08
chr5_41	rs16872492	clinical_c_M77	Other enthesopathies	Enthesopathies	0.8254	0.039618	0.00726	4.76e-08
chr12_93	rs11146967	30100-0.0	Mean platelet (thrombocyte) volume	Immunological and blood	0.9958	-0.008893	0.00164	6.22e-08
chr2_10	rs114431418	clinical_c_M66	Spontaneous rupture of synovium and tendon	Spontaneous rupture of synovium and tendon	0.8139	0.038361	0.00712	7.11e-08
chr2_18	rs11694806	20116-0.0	Smoking status	Alcohol & Smoking	0.9973	0.006949	0.0013	8.1e-08
chr15_104	rs111445047	selfReported_n_1761	tuberculosis (tb)	Tuberculosis	0.8081	0.21087	0.0395	9.66e-08
chr2_10	rs114431418	cancer_c_Block_C64-C68	Malignant neoplasms of urinary tract	Neoplasms	0.8139	0.067597	0.0127	9.7e-08
chr8_64	rs1913638	23128-0.0	Trunk fat mass	Impedance measures	0.997	0.047029	0.00885	1.08e-07
chr3_24	rs1436251	23101-0.0	Whole body fat-free mass	Impedance measures	0.9921	-0.072367	0.0136	1.11e-07
chr3_24	rs1436251	23102-0.0	Whole body water mass	Impedance measures	0.9921	-0.053107	0.01	1.26e-07
chr4_38	rs114383553	selfReported_n_1095	heart valve problem/heart murmur	Cardiac problems	0.9111	0.22417	0.0427	1.52e-07
chr4_39	rs35230778	30260-0.0	Mean reticulocyte volume	Immunological and blood	0.9977	-0.073032	0.014	1.71e-07
chr8_64	rs1839333	23128-0.0	Trunk fat mass	Impedance measures	0.9983	0.046595	0.00893	1.83e-07
chr15_104	rs111445047	selfReported_n_1136	other respiratory problems	Respiratory problems	0.8081	0.3099	0.0595	1.91e-07
chr3_24	rs1436251	23112-0.0	Leg fat mass (right)	Impedance measures	0.9921	-0.019125	0.00368	1.98e-07
chr4_39	rs4257605	30260-0.0	Mean reticulocyte volume	Immunological and blood	0.9999	-0.072531	0.0139	1.99e-07
chr4_39	rs13143879	30260-0.0	Mean reticulocyte volume	Immunological and blood	0.9998	-0.072536	0.0139	1.99e-07
chr3_24	rs1436251	23099-0.0	Body fat percentage	Immunological and blood	0.9921	-0.076475	0.0147	2e-07
chr10_77	rs10793555	30260-0.0	Mean reticulocyte volume	Impedance measures	0.9946	0.084117	0.0162	2e-07
chr8_64	rs1839333	30290-0.0	High light scatter reticulocyte percentage	Immunological and blood	0.9983	0.001892	0.000365	2.18e-07
chr10_79	rs363266	cancer_c_C54	Malignant neoplasm of corpus uteri	Neoplasms	0.8727	-0.022414	0.00433	2.24e-07
chr3_24	rs1436251	23116-0.0	Leg fat mass (left)	Impedance measures	0.9921	-0.018612	0.0036	2.26e-07
chr7_58	rs112913525	clinical_c_I89	Other non-infective disorders of lymphatic vessels and lymph nodes	Disorders of lymphatic vessels and lymph nodes	0.8907	0.015508	0.00301	2.48e-07
chr15_104	rs111445047	selfReported_n_1747	viral infection	Viral infections	0.8081	0.25538	0.0496	2.62e-07
chr4_39	rs35556180	30260-0.0	Mean reticulocyte volume	Immunological and blood	0.9987	-0.071833	0.014	2.67e-07
chr2_22	rs10166264	clinical_c_K85	Acute pancreatitis	Acute pancreatitis	0.9152	0.045739	0.00892	2.97e-07
chr10_75	rs115066892	clinical_c_B07	Viral warts	Viral infections	0.8521	0.049543	0.00972	3.47e-07
chr8_64	rs1839333	23127-0.0	Trunk fat percentage	Impedance measures	0.9983	0.06465	0.0127	3.74e-07
chr14_101	rs181594833	clinical_c_H50	Other strabismus	Eye and vision problems	0.841	0.059211	0.0117	4.14e-07
chr8_64	rs1913638	30290-0.0	High light scatter reticulocyte percentage	Immunological and blood	0.997	0.001829	0.000362	4.25e-07
chr3_24	rs1436251	23123-0.0	Arm fat percentage (left)	Impedance measures	0.9921	-0.088639	0.0177	5.26e-07
chr2_10	rs114431418	clinical_c_L97	Ulcer of lower limb not elsewhere classified	Ulcers	0.8139	0.05019	0.01	5.84e-07
chr3_24	rs1436251	23119-0.0	Arm fat percentage (right)	Impedance measures	0.9921	-0.087742	0.0176	5.88e-07
chr14_101	rs181594833	selfReported_n_1301	retinal problem	Eye and vision problems	0.841	0.095656	0.0192	5.98e-07
chr8_64	rs1913638	23127-0.0	Trunk fat percentage	Impedance measures	0.997	0.062844	0.0126	6.2e-07
chr20_118	rs1028554	23108-0.0	Impedance of leg (left)	Impedance measures	0.9973	0.26684	0.0536	6.33e-07
chr15_104	rs111445047	selfReported_n_1518	diverticular disease/diverticulitis	Diverticular disease/diverticulitis	0.8081	0.29422	0.0592	6.62e-07
chr4_40	rs116811275	selfReported_n_1239	testicular problems (not cancer)	Testicular problems	0.9484	0.012573	0.00254	7.4e-07
chr9_70	rs1460834	30100-0.0	Mean platelet (thrombocyte) volume	Immunological and blood	0.9997	-0.008949	0.00181	7.46e-07
chr11_88	rs113801096	clinical_c_H34	Retinal vascular occlusions	Renal/kidney problems	0.8264	0.016485	0.00337	9.81e-07
chr6_52	rs111481058	clinical_c_G44	Other headache syndromes	Headache	0.908	0.031581	0.00645	9.89e-07
chr8_64	rs1913638	23105-0.0	Basal metabolic rate	Disorders of fluid electrolyte and acid-base balance	0.997	6.7349	1.38	1.02e-06
chr8_64	rs1913638	23105-0.0	Basal metabolic rate	Impedance measures	0.997	6.7349	1.38	1.02e-06
chr15_104	rs111445047	clinical_c_E87	Other disorders of fluid electrolyte and acid-base balance	Impedance measures	0.8081	0.31006	0.0634	1.02e-06
chr10_75	rs115066892	clinical_c_J02	Acute pharyngitis	Acute upper respiratory infections	0.8521	0.051987	0.0107	1.06e-06
chr8_64	rs1839333	30240-0.0	Reticulocyte percentage	Immunological and blood	0.9983	0.00482	0.000992	1.17e-06
chr6_52	rs111481058	clinical_c_H60	Otitis externa	Otitis externa	0.908	0.031507	0.00651	1.3e-06
chr4_40	rs116811275	clinical_c_G31	Other degenerative diseases of nervous system not elsewhere classified	Neurodegenerative diseases	0.9484	0.012677	0.00262	1.32e-06
chr8_64	rs1839333	1687-0.0	Comparative body size at age 10	Comparative_body_size_at_age_10	0.9983	0.006173	0.00128	1.38e-06
chr12_93	rs11146967	1070-0.0	Time spent watching television (TV)	Sedentary activities	0.9958	0.014731	0.00305	1.41e-06
chr3_24	rs1436251	23126-0.0	Arm predicted mass (left)	Impedance measures	0.9921	-0.004786	0.000993	1.42e-06
chr11_88	rs113801096	clinical_c_Block_G70-G73	Diseases of myoneural junction and muscle	Diseases of myoneural junction and muscle	0.8264	0.016168	0.00336	1.48e-06
chr4_36	rs1401188	30080-0.0	Platelet count	Immunological and blood	0.9982	-0.54456	0.113	1.56e-06
chr17_109	rs35922062	clinical_c_M86	Osteomyelitis	Osteomyelitis	0.9025	0.030897	0.00646	1.7e-06
chr4_36	rs13110858	30080-0.0	Platelet count	Immunological and blood	0.9984	-0.54186	0.113	1.74e-06
chr14_101	rs181594833	clinical_c_F20	Schizophrenia	Psychiatric	0.841	0.042842	0.00897	1.77e-06
chr2_22	rs10166264	clinical_c_Block_J00-J06	Acute upper respiratory infections	Acute upper respiratory infections	0.9152	0.09639	0.0202	1.83e-06
chr3_24	rs1436251	23129-0.0	Trunk fat-free mass	Impedance measures	0.9921	-0.033287	0.00698	1.83e-06
chr3_24	rs1436251	23130-0.0	Trunk predicted mass	Impedance measures	0.9921	-0.031898	0.00669	1.89e-06
chr17_109	rs35922062	selfReported_n_1270	infection of nervous system	Infection of nervous system	0.9025	0.061298	0.0129	1.9e-06
chr20_118	rs1028554	135-0.0	Number of self-reported non-cancer illnesses	Number_of_self-reported_non-cancer_illnesses	0.9973	-0.016763	0.00352	1.91e-06
chr3_24	rs1436251	23125-0.0	Arm fat-free mass (left)	Impedance measures	0.9921	-0.005001	0.00105	2.03e-06
chr8_64	rs1913638	23117-0.0	Leg fat-free mass (left)	Impedance measures	0.997	0.009617	0.00203	2.08e-06
chr8_64	rs1839333	30300-0.0	High light scatter reticulocyte count	Immunological	0.9983	7.73e-05	1.63e-05	2.19e-06
chr8_64	rs1913638	30300-0.0	High light scatter reticulocyte count	Immunological	0.997	7.65e-05	1.62e-05	2.28e-06
chr8_64	rs1913638	23118-0.0	Leg predicted mass (left)	Impedance measures	0.997	0.008979	0.0019	2.31e-06
chr8_64	rs1913638	23126-0.0	Arm predicted mass (left)	Impedance measures	0.997	0.003475	0.000738	2.52e-06
chr4_40	rs116811275	clinical_c_L97	Ulcer of lower limb not elsewhere classified	Ulcers	0.9484	0.016163	0.00345	2.75e-06
chr8_64	rs1913638	23114-0.0	Leg predicted mass (right)	Impedance measures	0.997	0.008863	0.00189	2.78e-06
chr8_64	rs1913638	30240-0.0	Reticulocyte percentage	Immunological	0.997	0.004602	0.000983	2.83e-06
chr3_24	rs1436251	23122-0.0	Arm predicted mass (right)	Impedance measures	0.9921	-0.004359	0.000931	2.85e-06
chr3_24	rs1436251	23104-0.0	Body mass index (BMI)	Impedance measures	0.9921	-0.051163	0.0109	2.96e-06
chr2_10	rs114431418	clinical_c_O70	Perineal laceration during delivery	Reproduction	0.8139	0.10234	0.0219	3.1e-06
chr2_22	rs10166264	clinical_c_H50	Other strabismus	Eye and vision problems	0.9152	0.052697	0.0113	3.23e-06
chr8_64	rs1913638	1687-0.0	Comparative body size at age 10	Comparative_body_size_at_age_10	0.997	0.005892	0.00127	3.31e-06
chr9_70	rs1333635	30270-0.0	Mean sphered cell volume	Immunological	0.9949	0.039689	0.00853	3.32e-06
chr3_24	rs1436251	21001-0.0	Body mass index (BMI)	Impedance measures	0.9921	-0.051204	0.011	3.46e-06
chr8_64	rs1913638	23125-0.0	Arm fat-free mass (left)	Impedance measures	0.997	0.003631	0.000783	3.55e-06
chr1_4	rs16839017	selfReported_n_1503	clotting disorder/excessive bleeding	Clotting disorder/excessive bleeding	0.8957	0.023727	0.00512	3.58e-06
chr8_64	rs1913638	23113-0.0	Leg fat-free mass (right)	Impedance measures	0.997	0.009339	0.00202	3.64e-06
chr19_116	rs28374604	30040-0.0	Mean corpuscular volume	Immunological	0.9811	0.048579	0.0105	4.11e-06
chr4_38	rs114383553	30060-0.0	Mean corpuscular haemoglobin concentration	Immunological	0.9111	-1.8922	0.411	4.26e-06
chr10_79	rs363266	clinical_c_Block_J60-J70	Lung diseases due to external agents	Lung diseases due to external agents	0.8727	-0.018021	0.00392	4.27e-06
chr15_104	rs111445047	clinical_c_M54	Dorsalgia	Skeletal problems	0.8081	0.46842	0.102	4.51e-06
chr3_24	rs1436251	23121-0.0	Arm fat-free mass (right)	Impedance measures	0.9921	-0.004507	0.000988	5.07e-06
chr15_104	rs111445047	30130-0.0	Monocyte count	Immunological	0.8081	0.34402	0.0754	5.08e-06
chr4_38	rs114383553	30090-0.0	Platelet crit	Immunological	0.9111	0.078659	0.0173	5.13e-06
chr2_18	rs11694806	1070-0.0	Time spent watching television (TV)	Sedentary activities	0.9973	0.014022	0.00308	5.25e-06
chr17_109	rs35922062	selfReported_n_1762	tropical & travel-related infections	Tropical & travel-related infections	0.9025	0.030121	0.00665	5.99e-06
chr4_38	rs114383553	clinical_c_I51	Complications and ill-defined descriptions of heart disease	Cardiac problems	0.9111	0.21697	0.048	6.08e-06
chr8_64	rs1913638	23107-0.0	Impedance of leg (right)	Impedance measures	0.997	-0.24625	0.0546	6.53e-06
chr12_93	rs4883635	30050-0.0	Mean corpuscular haemoglobin	Immunological	0.9897	-0.03092	0.00686	6.56e-06
chr8_62	rs112056832	selfReported_n_1099	transient ischaemic attack (tia)	Transient ischaemic attack	0.9596	0.022389	0.00497	6.63e-06
chr20_118	rs1028554	23123-0.0	Arm fat percentage (left)	Impedance measures	0.9973	-0.05799	0.0129	6.74e-06
chr2_18	rs13426764	1070-0.0	Time spent watching television (TV)	Sedentary activities	0.9975	0.013841	0.00308	7.11e-06
chr8_64	rs1839333	23105-0.0	Basal metabolic rate	Impedance measures	0.9983	6.2262	1.39	7.55e-06
chr20_118	rs1028554	23107-0.0	Impedance of leg (right)	Impedance measures	0.9973	0.23784	0.0536	8.95e-06
chr17_109	rs35922062	selfReported_n_1347	osteomyelitis	Osteomyelitis	0.9025	0.031725	0.00714	8.98e-06
chr2_22	rs10166264	clinical_c_M67	Other disorders of synovium and tendon	Disorders of synovium and tendon	0.9152	0.10125	0.0229	9.99e-06

## Sheet: STable4
STable 4. SNPs found in association studies from gwasAtlas database
Region	TSP	Trait	Category	PV
chr4_39	rs13143879	High light scatter percentage of red cells (three-way meta)	Immunological and blood	1.4e-51
chr4_39	rs5016158	High light scatter percentage of red cells (three-way meta)	Immunological and blood	1.84e-51
chr4_39	rs4257605	High light scatter percentage of red cells (three-way meta)	Immunological and blood	1.87e-51
chr4_39	rs67600034	High light scatter percentage of red cells (three-way meta)	Immunological and blood	2.26e-51
chr4_39	rs36083417	High light scatter percentage of red cells (three-way meta)	Immunological and blood	2.73e-51
chr4_39	rs35556180	High light scatter percentage of red cells (three-way meta)	Immunological and blood	1.68e-50
chr4_39	rs13143879	High light scatter reticulocyte count (three-way meta)	Immunological and blood	2.55e-50
chr4_39	rs4257605	High light scatter reticulocyte count (three-way meta)	Immunological and blood	2.98e-50
chr4_39	rs67600034	High light scatter reticulocyte count (three-way meta)	Immunological and blood	3.04e-50
chr4_39	rs5016158	High light scatter reticulocyte count (three-way meta)	Immunological and blood	3.14e-50
chr4_39	rs36083417	High light scatter reticulocyte count (three-way meta)	Immunological and blood	4.01e-50
chr4_39	rs66717029	High light scatter percentage of red cells (three-way meta)	Immunological and blood	7.67e-50
chr4_39	rs35230778	High light scatter percentage of red cells (three-way meta)	Immunological and blood	9.1e-50
chr4_39	rs35556180	High light scatter reticulocyte count (three-way meta)	Immunological and blood	1.84e-49
chr4_39	rs66717029	High light scatter reticulocyte count (three-way meta)	Immunological and blood	1.14e-48
chr4_39	rs35230778	High light scatter reticulocyte count (three-way meta)	Immunological and blood	1.58e-48
chr4_39	rs13143879	Reticulocyte fraction of red cells (three-way meta)	Immunological and blood	4.32e-40
chr4_39	rs36083417	Reticulocyte fraction of red cells (three-way meta)	Immunological and blood	5.2e-40
chr4_39	rs5016158	Reticulocyte fraction of red cells (three-way meta)	Immunological and blood	6.16e-40
chr4_39	rs67600034	Reticulocyte fraction of red cells (three-way meta)	Immunological and blood	8.5e-40
chr4_39	rs4257605	Reticulocyte fraction of red cells (three-way meta)	Immunological and blood	9.04e-40
chr4_39	rs35556180	Reticulocyte fraction of red cells (three-way meta)	Immunological and blood	1.96e-39
chr4_39	rs36083417	High light scatter percentage of red cells (two-way meta)	Immunological and blood	5.66e-39
chr4_39	rs66717029	Reticulocyte fraction of red cells (three-way meta)	Immunological and blood	9.55e-39
chr4_39	rs36083417	High light scatter reticulocyte count (two-way meta)	Immunological and blood	1.16e-38
chr4_39	rs13143879	High light scatter percentage of red cells (two-way meta)	Immunological and blood	1.92e-38
chr4_39	rs5016158	High light scatter percentage of red cells (two-way meta)	Immunological and blood	2.42e-38
chr4_39	rs4257605	High light scatter percentage of red cells (two-way meta)	Immunological and blood	2.71e-38
chr4_39	rs35230778	Reticulocyte fraction of red cells (three-way meta)	Immunological and blood	2.82e-38
chr4_39	rs67600034	High light scatter percentage of red cells (two-way meta)	Immunological and blood	4.09e-38
chr4_39	rs13143879	High light scatter reticulocyte count (two-way meta)	Immunological and blood	4.43e-38
chr4_39	rs4257605	High light scatter reticulocyte count (two-way meta)	Immunological and blood	5.37e-38
chr4_39	rs5016158	High light scatter reticulocyte count (two-way meta)	Immunological and blood	5.56e-38
chr4_39	rs67600034	High light scatter reticulocyte count (two-way meta)	Immunological and blood	7.24e-38
chr4_39	rs35556180	High light scatter percentage of red cells (two-way meta)	Immunological and blood	1.31e-37
chr4_39	rs35556180	High light scatter reticulocyte count (two-way meta)	Immunological and blood	1.94e-37
chr4_39	rs66717029	High light scatter percentage of red cells (two-way meta)	Immunological and blood	2.12e-37
chr4_39	rs66717029	High light scatter reticulocyte count (two-way meta)	Immunological and blood	3.36e-37
chr4_39	rs36083417	Reticulocyte count (three-way meta)	Immunological and blood	6.38e-37
chr4_39	rs13143879	Reticulocyte count (three-way meta)	Immunological and blood	6.49e-37
chr4_39	rs5016158	Reticulocyte count (three-way meta)	Immunological and blood	8.14e-37
chr4_39	rs35230778	High light scatter percentage of red cells (two-way meta)	Immunological and blood	8.46e-37
chr4_39	rs67600034	Reticulocyte count (three-way meta)	Immunological and blood	9e-37
chr4_39	rs4257605	Reticulocyte count (three-way meta)	Immunological and blood	1.09e-36
chr17_111	rs7216471	Heel bone mineral density	Skeletal	1.4e-36
chr4_39	rs4257605	Immature fraction of reticulocytes (three-way meta)	Immunological and blood	1.59e-36
chr4_39	rs35556180	Reticulocyte count (three-way meta)	Immunological and blood	1.67e-36
chr4_39	rs13143879	Immature fraction of reticulocytes (three-way meta)	Immunological and blood	1.8e-36
chr4_39	rs67600034	Immature fraction of reticulocytes (three-way meta)	Immunological and blood	1.87e-36
chr4_39	rs35230778	High light scatter reticulocyte count (two-way meta)	Immunological and blood	1.95e-36
chr4_39	rs5016158	Immature fraction of reticulocytes (three-way meta)	Immunological and blood	1.96e-36
chr4_39	rs36083417	Immature fraction of reticulocytes (three-way meta)	Immunological and blood	7.13e-36
chr4_39	rs35230778	Immature fraction of reticulocytes (three-way meta)	Immunological and blood	8.14e-36
chr4_39	rs66717029	Reticulocyte count (three-way meta)	Immunological and blood	1.3e-35
chr4_39	rs35556180	Immature fraction of reticulocytes (three-way meta)	Immunological and blood	2.6e-35
chr4_39	rs35230778	Reticulocyte count (three-way meta)	Immunological and blood	3.36e-35
chr4_39	rs66717029	Immature fraction of reticulocytes (three-way meta)	Immunological and blood	9.35e-35
chr4_39	rs36083417	Reticulocyte fraction of red cells (two-way meta)	Immunological and blood	2.66e-32
chr17_111	rs7216471	Estimated bone mineral density from heel ultrasounds	Skeletal	3.9e-32
chr4_39	rs13143879	Reticulocyte fraction of red cells (two-way meta)	Immunological and blood	2.16e-31
chr4_39	rs5016158	Reticulocyte fraction of red cells (two-way meta)	Immunological and blood	2.74e-31
chr4_39	rs36083417	Reticulocyte count (two-way meta)	Immunological and blood	3.56e-31
chr4_39	rs4257605	Reticulocyte fraction of red cells (two-way meta)	Immunological and blood	4.19e-31
chr4_39	rs67600034	Reticulocyte fraction of red cells (two-way meta)	Immunological and blood	4.82e-31
chr4_39	rs35556180	Reticulocyte fraction of red cells (two-way meta)	Immunological and blood	6.55e-31
chr4_39	rs66717029	Reticulocyte fraction of red cells (two-way meta)	Immunological and blood	1.06e-30
chr4_39	rs13143879	Reticulocyte count (two-way meta)	Immunological and blood	3.16e-30
chr4_39	rs5016158	Reticulocyte count (two-way meta)	Immunological and blood	3.92e-30
chr4_39	rs4257605	Reticulocyte count (two-way meta)	Immunological and blood	5.03e-30
chr4_39	rs67600034	Reticulocyte count (two-way meta)	Immunological and blood	5.15e-30
chr4_39	rs35556180	Reticulocyte count (two-way meta)	Immunological and blood	5.93e-30
chr4_39	rs35230778	Reticulocyte fraction of red cells (two-way meta)	Immunological and blood	6.47e-30
chr4_39	rs66717029	Reticulocyte count (two-way meta)	Immunological and blood	9.74e-30
chr4_39	rs35230778	Reticulocyte count (two-way meta)	Immunological and blood	9.1e-29
chr4_39	rs4257605	Immature fraction of reticulocytes (two-way meta)	Immunological and blood	1.13e-24
chr4_39	rs13143879	Immature fraction of reticulocytes (two-way meta)	Immunological and blood	1.14e-24
chr4_39	rs5016158	Immature fraction of reticulocytes (two-way meta)	Immunological and blood	1.26e-24
chr4_39	rs67600034	Immature fraction of reticulocytes (two-way meta)	Immunological and blood	1.38e-24
chr4_39	rs36083417	Immature fraction of reticulocytes (two-way meta)	Immunological and blood	1.59e-24
chr4_39	rs35230778	Immature fraction of reticulocytes (two-way meta)	Immunological and blood	4.78e-24
chr4_39	rs35556180	Immature fraction of reticulocytes (two-way meta)	Immunological and blood	9.07e-24
chr4_39	rs66717029	Immature fraction of reticulocytes (two-way meta)	Immunological and blood	1.73e-23
chr16_107	rs57790054	Comparative body size at age 10	Comparative body size at age 10	9.62e-21
chr2_18	rs11694806	Educational attainment	Educational attainment	2.94e-18
chr2_18	rs13426764	Educational attainment	Educational attainment	1.11e-17
chr8_64	rs1913638	Uric acid	Uric acid	1.65e-16
chr8_64	rs1839333	Uric acid	Uric acid	1.67e-16
chr16_107	rs57790054	Resting heart rate	Cardiovascular	7.7e-14
chr16_107	rs57790054	Impedance measures - Impedance of leg (left)	Impedance measures	2.37e-13
chr16_107	rs57790054	Impedance measures - Impedance of whole body	Impedance measures	2.6e-13
chr9_70	rs1333635	Platelet distribution width (two-way meta)	Immunological and blood	3.14e-13
chr16_107	rs57790054	Impedance measures - Leg predicted mass (left)	Impedance measures	7.23e-13
chr16_107	rs57790054	Impedance measures - Leg fat-free mass (left)	Impedance measures	8.22e-13
chr10_77	rs10793555	Mean corpuscular volume (two-way meta)	Immunological and blood	9.05e-13
chr2_18	rs13426764	Age at menarche	Reproduction	9.12e-13
chr2_18	rs11694806	Age when periods started (menarche) (female)	Reproduction	1.14e-12
chr2_18	rs11694806	Age at menarche	Reproduction	1.17e-12
chr16_107	rs57790054	Impedance measures - Leg fat-free mass (right)	Impedance measures	1.19e-12
chr2_18	rs13426764	Age when periods started (menarche) (female)	Reproduction	1.2e-12
chr10_77	rs10793555	Mean corpuscular volume (three-way meta)	Immunological and blood	1.94e-12
chr16_107	rs57790054	Impedance measures - Leg predicted mass (right)	Impedance measures	1.95e-12
chr16_107	rs57790054	Pulse rate (automated reading)	Cardiovascular	2.02e-12
chr16_107	rs57790054	Body Mass Index	Impedance measures	3.51e-12
chr16_107	rs57790054	Impedance measures - Whole body water mass	Impedance measures	5.12e-12
chr16_107	rs57790054	Impedance measures - Whole body fat-free mass	Impedance measures	7.04e-12
chr4_39	rs35230778	Red cell distribution width (three-way meta)	Immunological and blood	7.7e-12
chr16_107	rs57790054	Impedance measures - Impedance of leg (right)	Impedance measures	1.15e-11
chr16_107	rs57790054	Impedance measures - Basal metabolic rate	Impedance measures	1.15e-11
chr4_39	rs5016158	Red cell distribution width (three-way meta)	Immunological and blood	1.2e-11
chr4_39	rs67600034	Red cell distribution width (three-way meta)	Immunological and blood	1.39e-11
chr4_39	rs13143879	Red cell distribution width (three-way meta)	Immunological and blood	1.56e-11
chr8_64	rs1913638	Body Mass Index	Impedance measures	1.7e-11
chr4_39	rs4257605	Red cell distribution width (three-way meta)	Immunological and blood	1.75e-11
chr4_39	rs36083417	Red cell distribution width (three-way meta)	Immunological and blood	2.35e-11
chr16_107	rs57790054	Weight	Weight	3.27e-11
chr4_39	rs35556180	Red cell distribution width (three-way meta)	Immunological and blood	4.36e-11
chr4_39	rs66717029	Red cell distribution width (three-way meta)	Immunological and blood	4.44e-11
chr2_18	rs13426764	Time spend outdoors in summer	Outdoor activities	5.92e-11
chr3_24	rs9848513	Height	Skeletal	6.3e-11
chr2_18	rs11694806	Time spend outdoors in summer	Outdoor activities	6.51e-11
chr8_64	rs1913638	Body Mass Index	Impedance measures	7.4e-11
chr16_107	rs57790054	Impedance measures - Weight	Impedance measures	9.73e-11
chr16_107	rs57790054	Impedance measures - Trunk fat-free mass	Impedance measures	1.98e-10
chr8_64	rs1913638	Serum Urate	Uric acid	2.77e-10
chr9_70	rs1333635	Platelet distribution width (three-way meta)	Immunological and blood	2.95e-10
chr16_107	rs57790054	Impedance measures - Trunk predicted mass	Impedance measures	3.79e-10
chr16_107	rs57790054	Alcohol intake frequency	Alcohol & Smoking	3.94e-10
chr16_107	rs57790054	Impedance measures - Arm fat-free mass (right)	Impedance measures	4.07e-10
chr8_64	rs1839333	Body Mass Index	Impedance measures	5.04e-10
chr16_107	rs57790054	Impedance measures - Arm predicted mass (right)	Impedance measures	6.21e-10
chr16_107	rs57790054	Body Mass Index (female)	Impedance measures	8.17e-10
chr16_107	rs57790054	Impedance measures - Impedance of arm (left)	Impedance measures	8.77e-10
chr16_107	rs57790054	Impedance measures - Arm predicted mass (left)	Impedance measures	9.93e-10
chr3_24	rs9848513	Impedance measures - Trunk fat mass	Impedance measures	1.07e-09
chr16_107	rs57790054	Impedance measures - Arm fat-free mass (left)	Impedance measures	1.32e-09
chr3_24	rs1436251	Impedance measures - Trunk fat mass	Impedance measures	1.46e-09
chr8_64	rs1913638	Body Mass Index (female)	Impedance measures	2.8e-09
chr3_29	rs35592194	Male-specific factors - Hair/balding pattern: Pattern 2	Dermatological	2.86e-09
chr10_77	rs10793555	Mean corpuscular hemoglobin (two-way meta)	Immunological and blood	3.76e-09
chr4_39	rs4257605	Plateletcrit (three-way meta)	Immunological and blood	3.91e-09
chr2_18	rs13426764	Number of days/week walked 10+ minutes	Physical activity	4.05e-09
chr2_18	rs13426764	Cognitive performance	Cognitive	5.02e-09
chr4_39	rs67600034	Plateletcrit (three-way meta)	Immunological and blood	5.66e-09
chr9_70	rs1333635	Platelet count (three-way meta)	Immunological and blood	5.97e-09
chr8_64	rs1839333	Body Mass Index (female)	Impedance measures	6.39e-09
chr4_39	rs13143879	Plateletcrit (three-way meta)	Immunological and blood	6.73e-09
chr16_107	rs57790054	Body Mass Index	Impedance measures	6.83e-09
chr3_24	rs9848513	Weight	Weight	7.02e-09
chr4_39	rs5016158	Plateletcrit (three-way meta)	Immunological and blood	7.31e-09
chr3_24	rs1436251	Weight	Weight	7.7e-09
chr10_77	rs10793555	Mean corpuscular hemoglobin (three-way meta)	Immunological and blood	8.85e-09
chr16_107	rs57790054	Birth weight	Birth weight	9.1e-09
chr4_39	rs35230778	Plateletcrit (three-way meta)	Immunological and blood	9.27e-09
chr4_39	rs35230778	Red cell distribution width (two-way meta)	Immunological and blood	9.51e-09
chr4_39	rs35556180	Plateletcrit (three-way meta)	Immunological and blood	1.01e-08
chr4_39	rs4257605	Plateletcrit (two-way meta)	Immunological and blood	1.01e-08
chr2_18	rs11694806	Cognitive performance	Cognitive	1.05e-08
chr8_64	rs1839333	Impedance measures - Body Mass Index (BMI)	Impedance measures	1.13e-08
chr16_107	rs57790054	Impedance measures - Body Mass Index (BMI)	Impedance measures	1.17e-08
chr17_111	rs7216471	Estimated BMD	Skeletal	1.2e-08
chr16_107	rs57790054	Impedance measures - Impedance of arm (right)	Impedance measures	1.2e-08
chr4_39	rs66717029	Plateletcrit (three-way meta)	Immunological and blood	1.52e-08
chr4_39	rs5016158	Red cell distribution width (two-way meta)	Immunological and blood	1.52e-08
chr4_39	rs67600034	Red cell distribution width (two-way meta)	Immunological and blood	1.55e-08
chr4_39	rs13143879	Red cell distribution width (two-way meta)	Immunological and blood	1.67e-08
chr4_39	rs67600034	Plateletcrit (two-way meta)	Immunological and blood	1.72e-08
chr4_39	rs4257605	Red cell distribution width (two-way meta)	Immunological and blood	1.81e-08
chr4_39	rs5016158	Plateletcrit (two-way meta)	Immunological and blood	1.94e-08
chr4_39	rs36083417	Red cell distribution width (two-way meta)	Immunological and blood	2.01e-08
chr3_24	rs9848513	Impedance measures - Weight	Impedance measures	2.03e-08
chr4_39	rs35230778	Plateletcrit (two-way meta)	Immunological and blood	2.15e-08
chr4_39	rs13143879	Plateletcrit (two-way meta)	Immunological and blood	2.17e-08
chr3_24	rs1436251	Impedance measures - Weight	Impedance measures	2.17e-08
chr8_64	rs1913638	Impedance measures - Body Mass Index (BMI)	Impedance measures	2.32e-08
chr4_39	rs36083417	Plateletcrit (three-way meta)	Immunological and blood	2.56e-08
chr2_18	rs11694806	Number of days/week walked 10+ minutes	Physical activity	2.59e-08
chr4_39	rs66717029	Red cell distribution width (two-way meta)	Immunological and blood	2.63e-08
chr8_64	rs1839333	Impedance measures - Arm fat percentage (left)	Impedance measures	2.63e-08
chr4_39	rs35556180	Red cell distribution width (two-way meta)	Immunological and blood	2.76e-08
chr4_39	rs66717029	Plateletcrit (two-way meta)	Immunological and blood	3.11e-08
chr8_64	rs1913638	Impedance measures - Arm fat percentage (left)	Impedance measures	3.13e-08
chr8_64	rs1839333	Body Mass Index	Impedance measures	3.68e-08
chr3_24	rs9848513	Impedance measures - Whole body fat mass	Impedance measures	4.03e-08
chr4_39	rs35556180	Plateletcrit (two-way meta)	Immunological and blood	4.08e-08
chr3_28	rs9869178	Automobile speeding propensity	Risky behavior	4.28e-08
chr3_28	rs2118072	Automobile speeding propensity	Risky behavior	4.4e-08
chr8_64	rs1913638	Impedance measures - Arm fat mass (left)	Impedance measures	4.59e-08
chr16_107	rs57790054	Body Mass Index	Impedance measures	4.6e-08
chr8_64	rs1839333	Impedance measures - Arm fat mass (left)	Impedance measures	4.7e-08
chr3_24	rs1436251	Impedance measures - Whole body fat mass	Impedance measures	4.95e-08
chr8_64	rs1913638	Impedance measures - Leg fat mass (left)	Impedance measures	5.08e-08
chr8_64	rs1913638	Impedance measures - Arm fat mass (right)	Impedance measures	5.33e-08
chr8_64	rs1839333	Estimated glomerular filtration rate	Estimated glomerular filtration rate	5.56e-08
chr2_18	rs11694806	Intelligence	Cognitive	5.62e-08
chr8_64	rs1839333	Impedance measures - Arm fat mass (right)	Impedance measures	6.02e-08
chr4_39	rs36083417	Plateletcrit (two-way meta)	Immunological and blood	7.41e-08
chr9_73	rs1154870	Standing height	Skeletal	7.54e-08
chr2_18	rs13426764	Ulcerative colitis	Gastrointestinal	7.7e-08
chr16_107	rs57790054	Frequency of drinking alcohol	Psychiatric	7.89e-08
chr8_64	rs1913638	Body Mass Index	Impedance measures	8e-08
chr2_18	rs11694806	Ulcerative colitis	Gastrointestinal	8.92e-08
chr8_64	rs1839333	Impedance measures - Leg fat mass (left)	Impedance measures	9.07e-08
chr2_18	rs13426764	Intelligence	Cognitive	9.96e-08
chr5_46	rs257899	Resting heart rate	Cardiovascular	1e-07
chr8_64	rs1913638	Impedance measures - Leg fat mass (right)	Impedance measures	1.03e-07
chr8_64	rs1913638	Impedance measures - Arm fat percentage (right)	Impedance measures	1.22e-07
chr2_20	rs7607367	Hair colour (natural, before greying): Blonde	Dermatological	1.23e-07
chr8_64	rs1839333	Impedance measures - Arm fat percentage (right)	Metabolic	1.35e-07
chr2_18	rs13426764	Mood swings (MOOD)	Psychiatric traits	1.4e-07
chr4_39	rs4257605	Standing height	Skeletal	1.45e-07
chr4_39	rs5016158	Standing height	Skeletal	1.51e-07
chr3_29	rs9880740	Superior longitudinal fasciculus mode of anisotropy	Neurological	1.52e-07
chr16_107	rs57790054	Sleep duration	Psychiatric	1.53e-07
chr2_20	rs11886107	Hair colour (natural, before greying): Blonde	Dermatological	1.57e-07
chr3_29	rs9880740	Right lateral occipital	Neurological	1.61e-07
chr8_64	rs1839333	Impedance measures - Leg fat mass (right)	Metabolic	1.63e-07
chr4_39	rs35230778	Standing height	Skeletal	1.64e-07
chr16_107	rs57790054	Birth weight	Birth weight	1.7e-07
chr9_70	rs1333635	Platelet count (two-way meta)	Immunological and blood	1.73e-07
chr4_39	rs13143879	Standing height	Skeletal	1.76e-07
chr8_64	rs1839333	Estimated glomerular filtration rate	Impedance measures	1.76e-07
chr16_107	rs57790054	Impedance measures - Whole body fat mass	Impedance measures	1.78e-07
chr3_24	rs1436251	Waist-hip ratio	Impedance measures	1.88e-07
chr16_107	rs57790054	Impedance measures - Leg fat mass (right)	Impedance measures	1.91e-07
chr3_24	rs9848513	Waist circumference	Impedance measures	2.01e-07
chr3_24	rs9848513	Waist-hip ratio	Impedance measures	2.07e-07
chr3_29	rs9880740	Male-specific factors - Hair/balding pattern: Pattern 2	Dermatological	2.07e-07
chr4_39	rs35556180	Standing height	Skeletal	2.08e-07
chr8_64	rs1913638	Estimated glomerular filtration rate	Estimated glomerular filtration rate	2.12e-07
chr2_18	rs11694806	Mood swings (MOOD)	Psychiatric	2.13e-07
chr3_28	rs9869178	Educational attainment	Environment	2.14e-07
chr2_18	rs13426764	Mood swings	Psychiatric	2.38e-07
chr2_18	rs13426764	Depressive affect subcluster	Psychiatric	2.38e-07
chr3_28	rs2118072	Educational attainment	Environment	2.4e-07
chr6_53	rs2981973	Right paracentral	Neurological	2.48e-07
chr16_107	rs57790054	Number of sleep episodes	Psychiatric	2.6e-07
chr8_64	rs1913638	Impedance measures - Whole body fat mass	Metabolic	2.8e-07
chr1_4	rs55801926	White blood cells	Immunological and blood	2.86e-07
chr1_4	rs16839017	White blood cells	Immunological and blood	3.04e-07
chr2_18	rs11694806	Depressive affect subcluster	Psychiatric	3.11e-07
chr20_120	rs6097587	Left inferior parietal	Neurological	3.18e-07
chr3_24	rs1436251	Waist circumference	Metabolic	3.22e-07
chr16_107	rs57790054	Impedance measures - Leg fat mass (left)	Metabolic	3.24e-07
chr2_18	rs11694806	Mood swings	Psychiatric	4.15e-07
chr2_18	rs13426764	Ulcerative colitis	Gastrointestinal	4.34e-07
chr16_107	rs57790054	Impedance measures - Arm fat mass (right)	Metabolic	4.49e-07
chr16_107	rs57790054	Impedance measures - Trunk fat mass	Metabolic	4.52e-07
chr4_39	rs5016158	Sitting height	Skeletal	4.52e-07
chr4_39	rs4257605	Sitting height	Skeletal	4.55e-07
chr3_24	rs9848513	Impedance measures - Trunk fat percentage	Metabolic	4.67e-07
chr4_39	rs13143879	Sitting height	Skeletal	5.11e-07
chr3_29	rs9880740	Right lateral occipital	Neurological	5.14e-07
chr8_64	rs1839333	Impedance measures - Whole body fat mass	Metabolic	5.2e-07
chr4_39	rs35230778	Sitting height	Skeletal	5.73e-07
chr3_24	rs1436251	Impedance measures - Trunk fat percentage	Metabolic	5.98e-07
chr4_39	rs35556180	Sitting height	Skeletal	6.13e-07
chr12_93	rs4883635	Mean corpuscular hemoglobin (two-way meta)	Immunological and blood	6.94e-07
chr10_79	rs363227	Morningness	Psychiatric	6.96e-07
chr16_107	rs57790054	Birth weight	Metabolic	6.97e-07
chr8_64	rs1913638	Estimated glomerular filtration rate	Metabolic	7.11e-07
chr4_39	rs4257605	Platelet count (three-way meta)	Immunological and blood	7.5e-07
chr10_79	rs363227	Morning/evening person (chronotype)	Psychiatric	7.65e-07
chr7_59	rs10234869	Impedance measures - Arm predicted mass (left)	Metabolic	8.04e-07
chr4_39	rs35230778	Platelet count (three-way meta)	Immunological and blood	8.37e-07
chr4_39	rs67600034	Platelet count (three-way meta)	Immunological and blood	8.62e-07
chr9_73	rs77450002	Standing height	Skeletal	8.76e-07
chr7_59	rs10234869	Impedance measures - Arm fat-free mass (left)	Metabolic	9.27e-07
chr4_39	rs13143879	Platelet count (three-way meta)	Immunological and blood	9.69e-07
chr4_39	rs5016158	Platelet count (three-way meta)	Immunological and blood	9.72e-07
chr8_64	rs1913638	Impedance measures - Body fat percentage	Metabolic	9.73e-07
chr12_90	rs1480001	Age at menarche	Reproduction	1.06e-06
chr8_64	rs1913638	Impedance measures - Weight	Metabolic	1.08e-06
chr16_107	rs57790054	Age at menarche	Reproduction	1.08e-06
chr8_64	rs1839333	Hip circumference	Metabolic	1.09e-06
chr3_24	rs9848513	Impedance measures - Arm fat mass (right)	Metabolic	1.22e-06
chr2_18	rs13426764	Average total household income before tax	Environment	1.22e-06
chr16_107	rs57790054	Sleep duration	Psychiatric	1.28e-06
chr20_120	rs6097587	Left inferior parietal	Neurological	1.28e-06
chr3_24	rs9848513	Impedance measures - Arm fat mass (left)	Metabolic	1.29e-06
chr3_24	rs1436251	Impedance measures - Arm fat mass (right)	Metabolic	1.31e-06
chr8_64	rs1913638	Impedance measures - Leg fat percentage (left)	Metabolic	1.32e-06
chr14_102	rs34344322	Time spend outdoors in summer	Activities	1.32e-06
chr4_39	rs35556180	Platelet count (three-way meta)	Immunological and blood	1.34e-06
chr3_24	rs1436251	Impedance measures - Arm fat mass (left)	Metabolic	1.37e-06
chr2_18	rs11694806	Educational attainment	Environment	1.4e-06
chr1_3	rs2422014	Types of physical activity in last 4 weeks: Light DIY (eg: pruning, watering the lawn)	Activities	1.48e-06
chr8_67	rs80024835	Standing height	Skeletal	1.48e-06
chr10_77	rs10793555	Heel bone mineral density	Skeletal	1.5e-06
chr14_102	rs11626207	Time spend outdoors in summer	Activities	1.5e-06
chr8_64	rs1839333	Impedance measures - Body fat percentage	Metabolic	1.51e-06
chr7_59	rs10234869	Impedance measures - Trunk fat-free mass	Metabolic	1.56e-06
chr2_18	rs13426764	Ever smoked regulary	Psychiatric	1.57e-06
chr2_18	rs11694806	Electronic device use - Plays computer games	Activities	1.62e-06
chr3_24	rs1436251	Social support - Leisure/social activities: Other group activity	Social Interactions	1.62e-06
chr7_60	rs60158858	Heel bone mineral density	Skeletal	1.7e-06
chr8_61	rs7006706	Educational attainment	Environment	1.72e-06
chr2_17	rs10196543	Interleukin-7	Immunological and blood	1.76e-06
chr2_18	rs11694806	Ever smoked regulary	Psychiatric	1.78e-06
chr8_67	rs61594459	Standing height	Skeletal	1.79e-06
chr8_64	rs1839333	Impedance measures - Weight	Metabolic	1.8e-06
chr8_64	rs1913638	Hip circumference	Metabolic	1.87e-06
chr4_39	rs4257605	Monocyte count (two-way meta)	Immunological and blood	1.88e-06
chr3_24	rs9848513	Social support - Leisure/social activities: Other group activity	Social Interactions	1.89e-06
chr10_79	rs363227	Chronotype	Psychiatric	1.9e-06
chr8_64	rs1839333	Impedance measures - Leg fat percentage (left)	Metabolic	1.94e-06
chr3_28	rs9869178	Anterior corona radiata mean diusivities	Neurological	1.95e-06
chr16_107	rs57790054	Hip circumference	Metabolic	1.95e-06
chr3_28	rs2118072	Anterior corona radiata mean diusivities	Neurological	1.96e-06
chr2_18	rs13426764	Educational attainment	Environment	1.98e-06
chr6_53	rs2981973	Right paracentral	Neurological	1.98e-06
chr16_107	rs57790054	Impedance measures - Arm fat mass (left)	Metabolic	1.99e-06
chr4_38	rs17007061	Age at menopause	Reproduction	2e-06
chr9_74	rs1806674	Short sleep	Psychiatric	2e-06
chr4_39	rs35556180	Monocyte count (two-way meta)	Immunological and blood	2.09e-06
chr8_64	rs1913638	Waist circumference	Metabolic	2.16e-06
chr3_24	rs1436251	Impedance measures - Basal metabolic rate	Metabolic	2.16e-06
chr3_24	rs1436251	Impedance measures - Leg predicted mass (left)	Metabolic	2.18e-06
chr4_32	rs78157989	Fresh fruit intake	Nutritional	2.19e-06
chr4_39	rs36083417	Platelet count (three-way meta)	Immunological and blood	2.19e-06
chr8_64	rs1913638	Weight	Metabolic	2.2e-06
chr7_59	rs10234869	Impedance measures - Trunk predicted mass	Metabolic	2.2e-06
chr2_18	rs13426764	Electronic device use - Plays computer games	Activities	2.22e-06
chr3_24	rs1436251	Impedance measures - Leg fat-free mass (left)	Metabolic	2.26e-06
chr12_93	rs4883635	Mean corpuscular hemoglobin concentration (two-way meta)	Immunological and blood	2.28e-06
chr4_39	rs67600034	Monocyte count (two-way meta)	Immunological and blood	2.34e-06
chr3_24	rs9848513	Impedance measures - Basal metabolic rate	Metabolic	2.35e-06
chr4_39	rs66717029	Platelet count (three-way meta)	Immunological and blood	2.41e-06
chr8_64	rs1913638	Impedance measures - Leg fat percentage (right)	Metabolic	2.41e-06
chr8_64	rs1913638	Age when periods started (menarche) (female)	Reproduction	2.42e-06
chr10_77	rs10793555	Red blood cell count (three-way meta)	Immunological and blood	2.43e-06
chr3_29	rs35592194	Left lateral occipital	Neurological	2.44e-06
chr4_39	rs4257605	Platelet count (two-way meta)	Immunological and blood	2.49e-06
chr3_24	rs9848513	Impedance measures - Leg predicted mass (left)	Metabolic	2.6e-06
chr2_18	rs11694806	Average total household income before tax	Environment	2.69e-06
chr3_24	rs9848513	Impedance measures - Leg fat-free mass (left)	Metabolic	2.7e-06
chr9_74	rs2002164	Short sleep	Psychiatric	2.7e-06
chr4_39	rs13143879	Monocyte count (two-way meta)	Immunological and blood	2.83e-06
chr3_29	rs9880740	Right superior temporal	Neurological	2.85e-06
chr4_39	rs5016158	Monocyte count (two-way meta)	Immunological and blood	2.9e-06
chr3_24	rs9848513	Average total household income before tax	Environment	2.95e-06
chr9_73	rs77450002	Hair colour (natural, before greying): Black	Dermatological	3.2e-06
chr8_64	rs1839333	Weight	Metabolic	3.29e-06
chr8_64	rs1913638	Body Mass Index	Metabolic	3.4e-06
chr4_33	rs2687419	Blood clot, DVT, bronchitis, emphysema, asthma, rhinitis, eczema, allergy diagnosed by doctor: Asthma	Respiratory	3.42e-06
chr4_39	rs35230778	Platelet count (two-way meta)	Immunological and blood	3.43e-06
chr16_106	rs896401	::::X-11818	Metabolic	3.43e-06
chr8_64	rs1839333	Impedance measures - Leg fat percentage (right)	Metabolic	3.43e-06
chr16_107	rs57790054	Drinks per week	Psychiatric	3.46e-06
chr4_39	rs67600034	Platelet count (two-way meta)	Immunological and blood	3.54e-06
chr4_39	rs5016158	Platelet count (two-way meta)	Immunological and blood	3.77e-06
chr7_59	rs10234869	Impedance measures - Arm fat-free mass (right)	Metabolic	3.8e-06
chr4_39	rs36083417	Monocyte count (two-way meta)	Immunological and blood	3.89e-06
chr4_39	rs13143879	Platelet count (two-way meta)	Immunological and blood	4.05e-06
chr3_24	rs1436251	Average total household income before tax	Environment	4.14e-06
chr20_120	rs6097587	Right inferior parietal	Neurological	4.18e-06
chr8_61	rs9792249	Educational attainment	Environment	4.25e-06
chr10_79	rs363227	Morning person (binary)	Psychiatric	4.4e-06
chr3_29	rs9880740	Right superior temporal	Neurological	4.43e-06
chr3_24	rs1436251	Body Mass Index	Metabolic	4.5e-06
chr4_38	rs17007061	Estimated bone mineral density from heel ultrasounds	Skeletal	4.6e-06
chr8_64	rs1839333	Arms-arm fat ratio (female)	Metabolic	4.68e-06
chr2_18	rs13426764	Strenuous sports or other exercises	Activities	4.7e-06
chr7_59	rs10234869	Impedance measures - Whole body fat-free mass	Metabolic	4.91e-06
chr8_64	rs1839333	Waist circumference	Metabolic	5.35e-06
chr3_29	rs9880740	Left supramarginal	Neurological	5.39e-06
chr16_107	rs57790054	Sleep duration	Psychiatric	5.4e-06
chr1_3	rs2422014	Educational attainment	Environment	5.45e-06
chr4_39	rs66717029	Monocyte count (two-way meta)	Immunological and blood	5.49e-06
chr3_24	rs9848513	Impedance measures - Body fat percentage	Metabolic	5.65e-06
chr2_18	rs11694806	Age started wearing glasses or contact lenses	Activities	5.75e-06
chr3_24	rs9848513	Impedance measures - Leg fat mass (right)	Metabolic	5.78e-06
chr9_69	rs78195958	Number of spontaneous miscarriages (female)	Reproduction	5.79e-06
chr7_59	rs10234869	Impedance measures - Arm predicted mass (right)	Metabolic	5.89e-06
chr4_39	rs66717029	Platelet count (two-way meta)	Immunological and blood	5.95e-06
chr2_18	rs13426764	Age started wearing glasses or contact lenses	Activities	6.06e-06
chr3_24	rs1436251	Impedance measures - Leg fat mass (right)	Metabolic	6.12e-06
chr1_3	rs2422014	Schizophrenia	Psychiatric	6.19e-06
chr4_32	rs79740699	Loneliness (multivariate)	Psychiatric	6.27e-06
chr7_59	rs10234869	Impedance measures - Whole body water mass	Metabolic	6.51e-06
chr3_24	rs1436251	Impedance measures - Body fat percentage	Metabolic	6.67e-06
chr10_77	rs10793555	Superior fronto-occipital fasciculus axial diusivities	Neurological	6.68e-06
chr4_39	rs35556180	Platelet count (two-way meta)	Immunological and blood	6.82e-06
chr3_29	rs9880740	Left pars triangularis	Neurological	6.82e-06
chr3_24	rs9848513	Standing height	Skeletal	6.91e-06
chr3_29	rs9880740	Left supramarginal	Neurological	6.97e-06
chr2_18	rs13426764	Ever smoker	Psychiatric	6.98e-06
chr4_39	rs35230778	Monocyte count (two-way meta)	Immunological and blood	7e-06
chr3_24	rs1436251	Impedance measures - Leg fat-free mass (right)	Metabolic	7.26e-06
chr8_64	rs1913638	Impedance measures - Trunk fat mass	Metabolic	7.29e-06
chr12_93	rs4883635	Mean corpuscular hemoglobin (three-way meta)	Immunological and blood	7.66e-06
chr3_28	rs9869178	Average across all tracts mean diusivities	Neurological	7.81e-06
chr3_24	rs1436251	Impedance measures - Leg predicted mass (right)	Metabolic	7.99e-06
chr3_28	rs9869178	Anterior corona radiata radial diusivities	Neurological	8.07e-06
chr1_2	rs531066	Electronic device use - Plays computer games	Activities	8.34e-06
chr3_28	rs2118072	Anterior corona radiata radial diusivities	Neurological	8.36e-06
chr3_24	rs9848513	Body Mass Index	Metabolic	8.37e-06
chr3_24	rs9848513	Impedance measures - Leg fat-free mass (right)	Metabolic	8.41e-06
chr3_24	rs9848513	Impedance measures - Leg fat mass (left)	Metabolic	8.51e-06
chr3_24	rs1436251	Impedance measures - Leg fat mass (left)	Metabolic	8.76e-06
chr3_29	rs35592194	Left lateral occipital	Neurological	8.8e-06
chr14_100	rs1887944	Chronotype	Psychiatric	8.8e-06
chr3_28	rs2118072	Average across all tracts mean diusivities	Neurological	8.91e-06
chr3_29	rs9880740	Left pars triangularis	Neurological	8.95e-06
chr9_70	rs1333635	Plateletcrit (three-way meta)	Immunological and blood	9.28e-06
chr3_24	rs9848513	Impedance measures - Leg predicted mass (right)	Metabolic	9.47e-06
chr4_39	rs36083417	Platelet count (two-way meta)	Immunological and blood	9.47e-06
chr3_28	rs2118072	Superior fronto-occipital fasciculus mean diusivities	Neurological	9.48e-06
chr14_100	rs7147645	Chronotype	Psychiatric	9.5e-06
chr3_28	rs9869178	Superior fronto-occipital fasciculus mean diusivities	Neurological	1e-05
chr9_74	rs2002164	Breastfed as a baby	Activities	1.02e-05
chr14_102	rs11626207	Estimated glomerular filtration rate	Metabolic	1.05e-05
chr9_74	rs1806674	Breastfed as a baby	Activities	1.11e-05
chr12_93	rs4883635	Immature fraction of reticulocytes (three-way meta)	Immunological and blood	1.14e-05
chr16_107	rs57790054	Comparative height size at age 10	Skeletal	1.14e-05
chr4_39	rs36083417	Inflammatory Bowel Disease	Gastrointestinal	1.19e-05
chr17_111	rs7216471	Fractures	Body Structures	1.2e-05
chr8_64	rs1839333	Impedance measures - Trunk fat mass	Metabolic	1.22e-05
chr4_39	rs5016158	FEV1/FVC ratio	Respiratory	1.24e-05
chr4_39	rs4257605	FEV1/FVC ratio	Respiratory	1.24e-05
chr4_39	rs13143879	FEV1/FVC ratio	Respiratory	1.25e-05
chr3_29	rs9880740	Central corneal thickness	Ophthalmological	1.25e-05
chr3_24	rs1436251	Standing height	Skeletal	1.28e-05
chr3_28	rs9869178	Intelligence	Cognitive	1.29e-05
chr7_60	rs4960719	Heel bone mineral density	Skeletal	1.3e-05
chr9_73	rs1154870	Comparative height size at age 10	Skeletal	1.31e-05
chr9_70	rs1333635	Monocyte count (three-way meta)	Immunological and blood	1.35e-05
chr14_102	rs34344322	Estimated glomerular filtration rate	Metabolic	1.35e-05
chr20_120	rs6097587	Right inferior parietal	Neurological	1.36e-05
chr3_28	rs2118072	Intelligence	Cognitive	1.42e-05
chr7_59	rs10234869	Impedance measures - Basal metabolic rate	Metabolic	1.45e-05
chr14_100	rs1887944	Morning person (binary)	Psychiatric	1.5e-05
chr3_28	rs9869178	Superior corona radiata mean diusivities	Neurological	1.5e-05
chr3_28	rs2118072	Superior corona radiata mean diusivities	Neurological	1.51e-05
chr9_70	rs1333635	Platelet count	Immunological and blood	1.53e-05
chr4_39	rs35230778	FEV1/FVC ratio	Respiratory	1.54e-05
chr7_59	rs10234869	Impedance measures - Impedance of arm (left)	Metabolic	1.57e-05
chr2_18	rs13426764	Smoking status: Never	Psychiatric	1.58e-05
chr14_100	rs7147645	Morning person (binary)	Psychiatric	1.6e-05
chr8_64	rs1913638	Impedance measures - Trunk fat percentage	Metabolic	1.65e-05
chr3_28	rs2118072	Superior fronto-occipital fasciculus radial diusivities	Neurological	1.66e-05
chr3_24	rs1436251	Impedance measures - Whole body fat-free mass	Metabolic	1.67e-05
chr4_38	rs17007061	Age at menopause (last menstrual period) (female)	Reproduction	1.72e-05
chr16_107	rs57790054	Impedance measures - Arm fat percentage (right)	Metabolic	1.73e-05
chr3_24	rs1436251	Impedance measures - Whole body water mass	Metabolic	1.75e-05
chr4_39	rs35556180	FEV1/FVC ratio	Respiratory	1.75e-05
chr4_39	rs36083417	Crohn's Disease	Gastrointestinal	1.8e-05
chr7_59	rs10234869	Waist-hip ratio (female)	Metabolic	1.81e-05
chr3_24	rs9848513	Impedance measures - Whole body fat-free mass	Metabolic	1.83e-05
chr3_28	rs9869178	Superior fronto-occipital fasciculus radial diusivities	Neurological	1.84e-05
chr2_15	rs1214090	Miserableness	Psychiatric	1.86e-05
chr9_73	rs77450002	Pork intake	Nutritional	1.87e-05
chr12_93	rs11146967	Time spent watching television (TV)	Activities	1.91e-05
chr14_102	rs11626207	Schizophrenia vs Bipolar disorder	Psychiatric	1.92e-05
chr3_24	rs9848513	Impedance measures - Whole body water mass	Metabolic	1.93e-05
chr14_102	rs34344322	Schizophrenia vs Bipolar disorder	Psychiatric	1.94e-05
chr17_111	rs7216471	Mean corpuscular hemoglobin concentration (three-way meta)	Immunological and blood	1.96e-05
chr2_18	rs11694806	Ever smoker	Psychiatric	1.99e-05
chr16_107	rs57790054	Waist circumference	Metabolic	2e-05
chr8_64	rs1913638	Arms-arm fat ratio (female)	Metabolic	2.05e-05
chr3_29	rs9880740	Left lateral occipital	Neurological	2.18e-05
chr3_28	rs2118072	Body of corpus callosum mean diusivities	Neurological	2.19e-05
chr4_37	rs2017370	Monocyte count (two-way meta)	Immunological and blood	2.21e-05
chr3_24	rs9848513	Impedance measures - Arm fat percentage (left)	Metabolic	2.22e-05
chr3_24	rs1436251	Impedance measures - Arm fat percentage (left)	Metabolic	2.24e-05
chr2_18	rs11694806	Strenuous sports or other exercises	Activities	2.3e-05
chr16_107	rs57790054	Frequent insomnia symptoms	Neurological	2.3e-05
chr3_28	rs9869178	Body of corpus callosum mean diusivities	Neurological	2.34e-05
chr16_107	rs57790054	Impedance measures - Arm fat percentage (left)	Metabolic	2.37e-05
chr8_64	rs1839333	Impedance measures - Trunk fat percentage	Metabolic	2.42e-05
chr2_18	rs11694806	Miserableness	Psychiatric	2.46e-05
chr12_90	rs1480001	Age when periods started (menarche) (female)	Reproduction	2.48e-05
chr2_18	rs13426764	Miserableness	Psychiatric	2.48e-05
chr21_123	rs2837774	Usual walking pace	Activities	2.5e-05
chr2_18	rs11694806	Miserableness (MIS)	Psychiatric	2.59e-05
chr2_15	rs1214090	Miserableness (MIS)	Psychiatric	2.6e-05
chr11_82	rs1992498	Medication for cholesterol, blood pressure, diabetes, or take exogenous hormones: Blood pressure medication	Activities	2.61e-05
chr4_39	rs5016158	FEV1/FVC ratio	Respiratory	2.67e-05
chr18_114	rs111966697	Alcohol usually taken with meals	Psychiatric	2.69e-05
chr4_39	rs4257605	FEV1/FVC ratio	Respiratory	2.7e-05
chr18_114	rs112239568	Alcohol usually taken with meals	Psychiatric	2.73e-05
chr4_39	rs13143879	FEV1/FVC ratio	Respiratory	2.78e-05
chr17_111	rs7216471	Mean corpuscular hemoglobin concentration (two-way meta)	Immunological and blood	2.78e-05
chr16_107	rs57790054	Arms-arm fat ratio (female)	Metabolic	2.78e-05
chr18_114	rs112239568	Obsessive compulsive disorder	Psychiatric	2.78e-05
chr2_15	rs1119384	Miserableness	Psychiatric	2.81e-05
chr2_18	rs13426764	Miserableness (MIS)	Psychiatric	2.82e-05
chr18_114	rs111966697	Obsessive compulsive disorder	Psychiatric	2.83e-05
chr6_52	rs73751802	Broad depression	Psychiatric	2.84e-05
chr5_44	rs12654351	Right pericalcarine	Neurological	2.98e-05
chr4_39	rs35556180	Monocyte count (three-way meta)	Immunological and blood	2.99e-05
chr13_95	rs2285330	Height	Skeletal	3.1e-05
chr3_24	rs9848513	Impedance measures - Arm fat percentage (right)	Metabolic	3.13e-05
chr3_24	rs1436251	Waist-hip ratio (male)	Metabolic	3.17e-05
chr8_64	rs1839333	Body Mass Index	Metabolic	3.2e-05
chr3_24	rs1436251	Impedance measures - Arm fat percentage (right)	Metabolic	3.26e-05
chr3_24	rs1436251	Body Mass Index	Metabolic	3.42e-05
chr3_29	rs9880740	Left lateral occipital	Neurological	3.53e-05
chr3_24	rs9848513	Strenuous sports or other exercises	Activities	3.6e-05
chr4_39	rs67600034	Monocyte count (three-way meta)	Immunological and blood	3.64e-05
chr2_15	rs1119384	Miserableness (MIS)	Psychiatric	3.66e-05
chr3_28	rs9869178	Average across all tracts radial diusivities	Neurological	3.68e-05
chr5_42	rs697720	Epstein Barr Virus antigen EBNA IgG levels	Cell	3.68e-05
chr20_121	rs6062838	Left pallidum	Neurological	3.73e-05
chr4_39	rs4257605	Monocyte count (three-way meta)	Immunological and blood	3.77e-05
chr3_28	rs2118072	Numeric memory test - Maximum digits remembered correctly	Cognitive	3.77e-05
chr3_28	rs9869178	Numeric memory test - Maximum digits remembered correctly	Cognitive	3.82e-05
chr14_102	rs11626207	Estimated glomerular filtration rate	Metabolic	3.84e-05
chr4_39	rs35556180	FEV1/FVC ratio	Respiratory	3.84e-05
chr17_111	rs7216471	Femoral Neck BMD	Skeletal	3.87e-05
chr2_18	rs13426764	Ulcerative Colitis	Gastrointestinal	3.97e-05
chr3_24	rs9848513	Body Mass Index	Metabolic	3.99e-05
chr4_39	rs35556180	Comparative height size at age 10	Skeletal	3.99e-05
chr4_39	rs35230778	FEV1/FVC ratio	Respiratory	4.01e-05
chr4_39	rs5016158	Comparative height size at age 10	Skeletal	4.03e-05
chr2_18	rs11694806	Ulcerative Colitis	Gastrointestinal	4.09e-05
chr4_39	rs4257605	Comparative height size at age 10	Skeletal	4.1e-05
chr9_70	rs1333635	Monocyte count (two-way meta)	Immunological and blood	4.1e-05
chr17_110	rs1561432	Height	Skeletal	4.1e-05
chr10_79	rs363227	Smoking status: Never	Psychiatric	4.11e-05
chr3_29	rs35592194	Frequency of stair climbing in last 4 weeks	Activities	4.12e-05
chr7_60	rs60158858	High light scatter reticulocyte count (two-way meta)	Immunological and blood	4.12e-05
chr3_28	rs2118072	Average across all tracts radial diusivities	Neurological	4.18e-05
chr4_33	rs2687419	Non-cancer illness code, self-reported: asthma	Respiratory	4.28e-05
chr4_39	rs66717029	Inflammatory Bowel Disease	Gastrointestinal	4.28e-05
chr4_39	rs13143879	Comparative height size at age 10	Skeletal	4.48e-05
chr13_97	rs9522338	Impedance measures - Leg fat-free mass (left)	Metabolic	4.52e-05
chr16_107	rs57790054	Sleeplessness / insomnia	Neurological	4.58e-05
chr4_39	rs35230778	Comparative height size at age 10	Skeletal	4.59e-05
chr13_97	rs9522338	Impedance measures - Leg predicted mass (left)	Metabolic	4.6e-05
chr3_24	rs1436251	Impedance measures - Arm predicted mass (right)	Metabolic	4.64e-05
chr13_97	rs9515467	Impedance measures - Leg fat-free mass (left)	Metabolic	4.68e-05
chr3_28	rs9869178	Frequent insomnia symptoms	Neurological	4.7e-05
chr3_28	rs2118072	Frequent insomnia symptoms	Neurological	4.7e-05
chr9_74	rs1806674	Sleep duration	Psychiatric	4.7e-05
chr17_110	rs2083261	Height	Skeletal	4.7e-05
chr13_97	rs9515467	Impedance measures - Leg predicted mass (left)	Metabolic	4.75e-05
chr14_102	rs34344322	Estimated glomerular filtration rate	Metabolic	4.81e-05
chr20_119	rs76787503	Frequency of solarium/sunlamp use	Activities	4.88e-05
chr3_24	rs1436251	Strenuous sports or other exercises	Activities	4.9e-05
chr5_46	rs257894	Impedance measures - Trunk fat percentage	Metabolic	4.92e-05
chr7_59	rs10234869	Waist circumference	Metabolic	4.97e-05
chr20_118	rs1028554	Body Mass Index	Metabolic	5.14e-05
chr5_46	rs257899	Use of sun/uv protection	Activities	5.15e-05
chr3_24	rs9848513	Impedance measures - Arm predicted mass (right)	Metabolic	5.28e-05
chr12_93	rs4883635	Height	Skeletal	5.3e-05
chr8_64	rs1913638	Impedance measures - Leg fat-free mass (left)	Metabolic	5.31e-05
chr4_39	rs13143879	Monocyte count (three-way meta)	Immunological and blood	5.33e-05
chr5_46	rs257899	Pulse rate (automated reading)	Cardiovascular	5.46e-05
chr10_77	rs10793555	Estimated bone mineral density from heel ultrasounds	Skeletal	5.5e-05
chr3_24	rs9848513	Lumbar Spine BMD (females)	Skeletal	5.57e-05
chr7_60	rs60158858	Reticulocyte count (two-way meta)	Immunological and blood	5.58e-05
chr4_39	rs5016158	Monocyte count (three-way meta)	Immunological and blood	5.58e-05
chr20_118	rs6085129	Body Mass Index	Metabolic	5.62e-05
chr3_24	rs1436251	Impedance measures - Arm fat-free mass (right)	Metabolic	5.81e-05
chr9_73	rs1154870	Sitting height	Skeletal	5.9e-05
chr2_17	rs10196543	Interleukin-13	Immunological and blood	5.93e-05
chr8_64	rs1913638	Impedance measures - Leg predicted mass (left)	Metabolic	5.96e-05
chr20_118	rs6085129	Number of self-reported non-cancer illnesses	Mortality	6.05e-05
chr8_64	rs1913638	Lipid::Medium chain fatty acid::10-undecenoate (11:1n1)	Metabolic	6.05e-05
chr3_24	rs9848513	Body Mass Index	Metabolic	6.1e-05
chr7_55	rs10807948	Number of days/week walked 10+ minutes	Activities	6.18e-05
chr4_39	rs66717029	Crohn's Disease	Gastrointestinal	6.2e-05
chr10_79	rs363227	Nap during day	Psychiatric	6.22e-05
chr3_29	rs9880740	Reaction time test - Mean time to correctly identify matches	Cognitive	6.27e-05
chr3_24	rs9848513	Impedance measures - Arm fat-free mass (left)	Metabolic	6.33e-05
chr3_24	rs1436251	Impedance measures - Arm fat-free mass (left)	Metabolic	6.34e-05
chr3_24	rs9848513	Types of transport used (excluding work): Cycle	Activities	6.35e-05
chr3_24	rs9848513	Impedance measures - Arm fat-free mass (right)	Metabolic	6.4e-05
chr7_55	rs34925936	Number of days/week walked 10+ minutes	Activities	6.54e-05
chr8_64	rs1913638	Impedance measures - Basal metabolic rate	Metabolic	6.56e-05
chr12_92	rs115434075	Milk type used: Semi-skimmed	Nutritional	6.64e-05
chr2_18	rs11694806	Smoking status: Never	Psychiatric	6.75e-05
chr2_20	rs7607367	Hair colour (natural, before greying): Dark brown	Dermatological	6.81e-05
chr2_20	rs11886107	Hair colour (natural, before greying): Dark brown	Dermatological	6.82e-05
chr2_18	rs11694806	Bread type: White	Nutritional	6.85e-05
chr4_39	rs36083417	Monocyte count (three-way meta)	Immunological and blood	6.9e-05
chr9_74	rs2002164	Adrenergics, inhalants	Environmental	6.9e-05
chr3_24	rs1436251	Types of transport used (excluding work): Cycle	Activities	6.91e-05
chr13_97	rs9522338	Impedance measures - Leg fat-free mass (right)	Metabolic	6.92e-05
chr13_97	rs9522338	Impedance measures - Leg predicted mass (right)	Metabolic	7.02e-05
chr13_96	rs6311	Facial attractiveness (female-coder, male samples)	Activities	7.11e-05
chr18_113	rs1893789	Happiness and subjective well-being - Belief that own life is meaningfull	Psychiatric	7.14e-05
chr9_70	rs1333635	Plateletcrit (two-way meta)	Immunological and blood	7.2e-05
chr10_79	rs363227	Sleep duration	Psychiatric	7.2e-05
chr9_70	rs1460834	Proxy and clinically diagnosed Alzheimer's disease	Neurological	7.31e-05
chr13_97	rs9515467	Impedance measures - Leg fat-free mass (right)	Metabolic	7.34e-05
chr13_97	rs9515467	Impedance measures - Leg predicted mass (right)	Metabolic	7.43e-05
chr21_123	rs2837774	Impedance measures - Trunk fat mass	Metabolic	7.51e-05
chr2_17	rs10196543	Posterior cortical atrophy	Neurological	7.53e-05
chr20_118	rs6085129	Arms-arm fat ratio (female)	Metabolic	7.54e-05
chr20_121	rs6062838	Left pallidum	Neurological	7.67e-05
chr21_123	rs2837774	Weight	Metabolic	7.7e-05
chr20_118	rs1028554	Arms-arm fat ratio (female)	Metabolic	7.83e-05
chr4_39	rs35230778	Crohn's Disease	Gastrointestinal	7.89e-05
chr14_102	rs11626207	Cannabis use - Ever taken cannabis	Psychiatric	7.94e-05
chr7_59	rs10234869	Waist-hip ratio	Metabolic	8.07e-05
chr9_70	rs1333635	Reticulocyte count (two-way meta)	Immunological and blood	8.08e-05
chr3_24	rs1436251	Never eat eggs, dairy, wheat, sugar: Sugar or foods/drinks containing sugar	Nutritional	8.13e-05
chr20_120	rs6097587	Waist-hip ratio	Metabolic	8.3e-05
chr20_118	rs1028554	Number of self-reported non-cancer illnesses	Mortality	8.31e-05
chr4_39	rs66717029	Monocyte count (three-way meta)	Immunological and blood	8.49e-05
chr3_24	rs9848513	Never eat eggs, dairy, wheat, sugar: Sugar or foods/drinks containing sugar	Nutritional	8.55e-05
chr11_86	rs2249268	Schizophrenia	Psychiatric	8.59e-05
chr9_74	rs2002164	Sleep duration	Psychiatric	8.6e-05
chr3_28	rs2118072	Body of corpus callosum radial diusivities	Neurological	8.76e-05
chr8_62	rs4557662	MIF - Macrophage migration inhibitory factor	Cell	8.78e-05
chr3_28	rs9869178	Body of corpus callosum radial diusivities	Neurological	8.82e-05
chr3_24	rs9848513	Impedance measures - Arm predicted mass (left)	Metabolic	8.85e-05
chr3_29	rs9880740	Frequency of stair climbing in last 4 weeks	Activities	8.88e-05
chr14_102	rs34344322	Cannabis use - Ever taken cannabis	Psychiatric	8.89e-05
chr3_24	rs1436251	Impedance measures - Arm predicted mass (left)	Metabolic	8.92e-05
chr3_24	rs1436251	Impedance measures - Trunk fat-free mass	Metabolic	8.95e-05
chr7_59	rs10234869	Impedance measures - Impedance of arm (right)	Metabolic	9e-05
chr3_24	rs9848513	Impedance measures - Trunk fat-free mass	Metabolic	9.08e-05
chr4_32	rs79740699	Bread type: White	Nutritional	9.1e-05
chr12_93	rs4883635	Mean corpuscular hemoglobin concentration (three-way meta)	Immunological and blood	9.13e-05
chr3_24	rs1436251	Impedance measures - Trunk predicted mass	Metabolic	9.23e-05
chr4_39	rs35556180	Crohn's Disease	Gastrointestinal	9.28e-05
chr8_61	rs9792249	Tea intake	Nutritional	9.37e-05
chr3_24	rs9848513	Impedance measures - Trunk predicted mass	Metabolic	9.39e-05
chr21_123	rs2837774	Impedance measures - Whole body fat mass	Metabolic	9.46e-05
chr7_59	rs10234869	Birth weight	Metabolic	9.6e-05
chr3_29	rs35592194	TFPI - Tissue factor pathway inhibitor	Cell	9.61e-05
chr3_24	rs1436251	Impedance measures - Body Mass Index (BMI)	Metabolic	9.69e-05
chr21_123	rs2837774	Impedance measures - Weight	Metabolic	9.76e-05
chr5_46	rs257894	Impedance measures - Body fat percentage	Metabolic	9.78e-05
chr9_70	rs1333635	Reticulocyte fraction of red cells (three-way meta)	Immunological and blood	9.81e-05
chr7_59	rs10234869	Treatment/medication code: amlodipine	Activities	9.92e-05
chr3_24	rs9848513	Waist-hip ratio (female)	Metabolic	9.96e-05

## Sheet: STable5
STable 5. TSPs (and LD SNPs) that are coding variants
Region	RSID	Allele	Gene	Consequence	ExonicFunc.refGene	Source	TSP
chr1_6	rs78218236	A	SOAT1	synonymous_variant	synonymous SNV	ANNOVAR,VEP	0
chr2_19	rs61752198	A	SPAG16	missense_variant,start_lost	nonsynonymous	ANNOVAR,VEP	0
chr2_19	rs61752199	A	SPAG16	missense_variant	nonsynonymous	ANNOVAR,VEP	0
chr4_31	rs12645938	A	QDPR	synonymous_variant	synonymous SNV	ANNOVAR,VEP	0
chr4_39	rs1545437	T	FREM3	synonymous_variant	synonymous SNV	ANNOVAR,VEP	0
chr4_39	rs61427459	T	FREM3	synonymous_variant	synonymous SNV	ANNOVAR,VEP	0
chr4_39	rs11100802	G	FREM3	synonymous_variant	synonymous SNV	ANNOVAR,VEP	0
chr4_39	rs55935372	G	FREM3	missense_variant	nonsynonymous	ANNOVAR,VEP	0
chr4_39	rs7683365	A	GYPB	missense_variant	nonsynonymous	ANNOVAR,VEP	0
chr8_64	rs2943549	A	HNF4G	missense_variant	nonsynonymous	ANNOVAR,VEP	0
chr8_64	rs1805098	A	HNF4G	missense_variant	nonsynonymous	ANNOVAR,VEP	0
chr9_71	rs4645656	T	ZNF782	missense_variant	nonsynonymous	ANNOVAR,VEP	0
chr9_71	rs7870376	G	ZNF782	missense_variant	nonsynonymous	ANNOVAR,VEP	0
chr10_79	rs3814230	C	PDZD8	synonymous_variant	synonymous SNV	ANNOVAR,VEP	0
chr10_79	rs3814229	C	PDZD8	synonymous_variant	synonymous SNV	ANNOVAR,VEP	0
chr11_81	rs10839568	T	DNHD1	synonymous_variant	synonymous SNV	ANNOVAR,VEP	0
chr11_81	rs4758423	T	DNHD1	missense_variant	nonsynonymous	ANNOVAR,VEP	0
chr11_81	rs4633449	C	DNHD1	missense_variant	nonsynonymous	ANNOVAR,VEP	0
chr11_81	rs7480644	G	DNHD1	missense_variant	nonsynonymous	ANNOVAR,VEP	0
chr11_81	rs2344828	G	DNHD1	missense_variant	nonsynonymous	ANNOVAR,VEP	0
chr11_81	rs2344829	A	DNHD1	missense_variant	nonsynonymous	ANNOVAR,VEP	0
chr11_81	rs4282961	A	DNHD1	missense_variant	nonsynonymous	ANNOVAR,VEP	0
chr11_81	rs10839577	G	DNHD1	synonymous_variant	synonymous SNV	ANNOVAR,VEP	1
chr12_93	rs12819734	A	LRCOL1	missense_variant	nonsynonymous	ANNOVAR,VEP	0
chr13_96	rs6313	A	HTR2A	synonymous_variant	synonymous SNV	ANNOVAR,VEP	0
chr14_98	rs2075489	T	TRAV8-3	synonymous_variant	synonymous SNV	VEP	0
chr14_98	rs2017263	C	TRAV8-3	synonymous_variant	synonymous SNV	VEP	0
chr16_108	rs12918619	C	PKD1L2	missense_variant	unknown	ANNOVAR,VEP	1
chr17_109	rs61745426	C	DNAH9	synonymous_variant	synonymous SNV	ANNOVAR,VEP	0
chr17_109	rs8070501	T	DNAH9	missense_variant	nonsynonymous	ANNOVAR,VEP	0
chr17_109	rs8070788	A	DNAH9	synonymous_variant	synonymous SNV	ANNOVAR,VEP	0
chr17_109	rs35922062	T	DNAH9	synonymous_variant	synonymous SNV	ANNOVAR,VEP	1
chr22_124	rs2239813	G	ARHGAP8;PRR5-ARHGAP8	synonymous_variant	synonymous SNV	ANNOVAR,VEP	0

## Sheet: STable6
Stable 6. TSP and LD variants (R2≥0.8)
CHR	hg19	hg38	RSID	Region	TSP_SNP	TSP?	LD_Group_(1kgp)
chr1	30034224	29561377	rs77494354	chr1_1	rs76483414,rs76718158	0	AFR
chr1	30037102	29564255	rs78929672	chr1_1	rs76483414,rs76718158	0	AFR
chr1	30038133	29565286	rs80331945	chr1_1	rs76483414,rs76718158	0	AFR
chr1	30039397	29566550	rs79556813	chr1_1	rs76483414,rs76718158	0	AFR
chr1	30040078	29567231	rs28610577	chr1_1	rs76483414,rs76718158	0	AFR
chr1	30042485	29569638	rs78742487	chr1_1	rs76483414,rs76718158	0	AFR
chr1	30043156	29570309	rs114457418	chr1_1	rs76483414,rs76718158	0	AFR
chr1	30043849	29571002	rs115719230	chr1_1	rs76483414,rs76718158	0	AFR
chr1	30051777	29578930	rs79308240	chr1_1	rs76483414,rs76718158	0	AFR
chr1	30052126	29579279	rs78324916	chr1_1	rs76483414,rs76718158	0	AFR
chr1	30052343	29579496	rs77686155	chr1_1	rs76483414,rs76718158	0	AFR
chr1	30052402	29579555	rs75172768	chr1_1	rs76483414,rs76718158	0	AFR
chr1	30052523	29579676	rs141912578	chr1_1	rs76483414,rs76718158	0	AFR
chr1	30052537	29579690	rs116028734	chr1_1	rs76483414,rs76718158	0	AFR
chr1	30052555	29579708	rs116321177	chr1_1	rs76483414,rs76718158	0	AFR
chr1	30052635	29579788	rs115541011	chr1_1	rs76483414,rs76718158	0	AFR
chr1	30052675	29579828	rs76626712	chr1_1	rs76483414,rs76718158	0	AFR
chr1	30052794	29579947	rs76483414	chr1_1	rs76483414,rs76718158	1	AFR
chr1	30052872	29580025	rs143024371	chr1_1	rs76483414,rs76718158	0	AFR
chr1	30052964	29580117	rs114209134	chr1_1	rs76483414,rs76718158	0	AFR
chr1	30053082	29580235	rs75609682	chr1_1	rs76483414,rs76718158	0	AFR
chr1	30053834	29580987	rs79058992	chr1_1	rs76483414,rs76718158	0	AFR
chr1	30053920	29581073	rs76118125	chr1_1	rs76483414,rs76718158	0	AFR
chr1	30053946	29581099	rs75643150	chr1_1	rs76483414,rs76718158	0	AFR
chr1	30054043	29581196	rs79575524	chr1_1	rs76483414,rs76718158	0	AFR
chr1	30054133	29581286	rs149926058	chr1_1	rs76483414,rs76718158	0	AFR
chr1	30054297	29581450	rs78881127	chr1_1	rs76483414,rs76718158	0	AFR
chr1	30054681	29581834	rs115483944	chr1_1	rs76483414,rs76718158	0	AFR
chr1	30054927	29582080	rs149685589	chr1_1	rs76483414,rs76718158	0	AFR
chr1	30055104	29582257	rs144006004	chr1_1	rs76483414,rs76718158	0	AFR
chr1	30055122	29582275	rs79794197	chr1_1	rs76483414,rs76718158	0	AFR
chr1	30055214	29582367	rs74456709	chr1_1	rs76483414,rs76718158	0	AFR
chr1	30055247	29582400	rs76378756	chr1_1	rs76483414,rs76718158	0	AFR
chr1	30055366	29582519	rs79986340	chr1_1	rs76483414,rs76718158	0	AFR
chr1	30055413	29582566	rs79681152	chr1_1	rs76483414,rs76718158	0	AFR
chr1	30055434	29582587	rs78720305	chr1_1	rs76483414,rs76718158	0	AFR
chr1	30055810	29582963	rs147569735	chr1_1	rs76483414,rs76718158	0	AFR
chr1	30055924	29583077	rs144531928	chr1_1	rs76483414,rs76718158	0	AFR
chr1	30055934	29583087	rs147816123	chr1_1	rs76483414,rs76718158	0	AFR
chr1	30056135	29583288	rs76718158	chr1_1	rs76483414,rs76718158	1	AFR
chr1	30056176	29583329	rs74551075	chr1_1	rs76483414,rs76718158	0	AFR
chr1	30056363	29583516	rs79096432	chr1_1	rs76483414,rs76718158	0	AFR
chr1	30056619	29583772	rs78271975	chr1_1	rs76483414,rs76718158	0	AFR
chr1	30056875	29584028	rs28660451	chr1_1	rs76483414,rs76718158	0	AFR
chr1	30056884	29584037	rs28632183	chr1_1	rs76483414,rs76718158	0	AFR
chr1	30057029	29584182	rs28482172	chr1_1	rs76483414,rs76718158	0	AFR
chr1	30057047	29584200	rs150453277	chr1_1	rs76483414,rs76718158	0	AFR
chr1	30057071	29584224	rs28521686	chr1_1	rs76483414,rs76718158	0	AFR
chr1	30057246	29584399	rs28397831	chr1_1	rs76483414,rs76718158	0	AFR
chr1	30057280	29584433	rs77617117	chr1_1	rs76483414,rs76718158	0	AFR
chr1	30057321	29584474	rs79857361	chr1_1	rs76483414,rs76718158	0	AFR
chr1	30057784	29584937	rs114416448	chr1_1	rs76483414,rs76718158	0	AFR
chr1	30057823	29584976	rs28545392	chr1_1	rs76483414,rs76718158	0	AFR
chr1	30058276	29585429	rs77143607	chr1_1	rs76483414,rs76718158	0	AFR
chr1	30058459	29585612	rs116575017	chr1_1	rs76483414,rs76718158	0	AFR
chr1	30058619	29585772	rs76448366	chr1_1	rs76483414,rs76718158	0	AFR
chr1	30058698	29585851	rs115894307	chr1_1	rs76483414,rs76718158	0	AFR
chr1	30058701	29585854	rs75676787	chr1_1	rs76483414,rs76718158	0	AFR
chr1	30058722	29585875	rs114927673	chr1_1	rs76483414,rs76718158	0	AFR
chr1	30058932	29586085	rs79760521	chr1_1	rs76483414,rs76718158	0	AFR
chr1	30059062	29586215	rs76750858	chr1_1	rs76483414,rs76718158	0	AFR
chr1	30059240	29586393	rs77362905	chr1_1	rs76483414,rs76718158	0	AFR
chr1	30059427	29586580	rs76446871	chr1_1	rs76483414,rs76718158	0	AFR
chr1	30059928	29587081	rs116394419	chr1_1	rs76483414,rs76718158	0	AFR
chr1	30060025	29587178	rs75644517	chr1_1	rs76483414,rs76718158	0	AFR
chr1	30060742	29587895	rs74579957	chr1_1	rs76483414,rs76718158	0	AFR
chr1	30061280	29588433	rs75675149	chr1_1	rs76483414,rs76718158	0	AFR
chr1	30062659	29589812	rs376071141	chr1_1	rs76483414,rs76718158	0	AFR
chr1	30063658	29590811	rs11802070	chr1_1	rs76483414,rs76718158	0	AFR
chr1	30064100	29591253	rs11801114	chr1_1	rs76483414,rs76718158	0	AFR
chr1	30064202	29591355	rs116792955	chr1_1	rs76483414,rs76718158	0	AFR
chr1	30072023	29599176	rs115489713	chr1_1	rs76483414,rs76718158	0	AFR
chr1	34429821	33964220	rs55948140	chr1_2	rs531066,rs6677026	0	AFR;EAS;EUR
chr1	34430533	33964932	rs545337	chr1_2	rs531066,rs6677026	0	EUR
chr1	34430578	33964977	rs12131786	chr1_2	rs531066,rs6677026	0	AFR;EAS;EUR
chr1	34430852	33965251	rs557140	chr1_2	rs531066,rs6677026	0	EUR
chr1	34431773	33966172	rs1325252	chr1_2	rs531066,rs6677026	0	AFR;EAS;EUR
chr1	34432484	33966883	rs12128266	chr1_2	rs531066,rs6677026	0	AFR;EAS;EUR
chr1	34432639	33967038	rs12118822	chr1_2	rs531066,rs6677026	0	AFR;EAS;EUR
chr1	34432868	33967267	rs11397947	chr1_2	rs531066,rs6677026	0	AFR;EAS;EUR
chr1	34432990	33967389	rs7548494	chr1_2	rs531066,rs6677026	0	AFR;EAS;EUR
chr1	34433114	33967513	rs7515176	chr1_2	rs531066,rs6677026	0	AFR;EAS;EUR
chr1	34433132	33967531	rs7525542	chr1_2	rs531066,rs6677026	0	AFR;EAS;EUR
chr1	34433190	33967589	rs7548678	chr1_2	rs531066,rs6677026	0	AFR;EAS;EUR
chr1	34433405	33967804	rs56278326	chr1_2	rs531066,rs6677026	0	AFR;EAS;EUR
chr1	34433613	33968012	rs12565277	chr1_2	rs531066,rs6677026	0	AFR;EAS;EUR
chr1	34433749	33968148	rs12563294	chr1_2	rs531066,rs6677026	0	AFR;EAS;EUR
chr1	34433848	33968247	rs12563302	chr1_2	rs531066,rs6677026	0	AFR;EAS;EUR
chr1	34434464	33968863	rs12120071	chr1_2	rs531066,rs6677026	0	AFR;EAS;EUR
chr1	34434703	33969102	rs61769938	chr1_2	rs531066,rs6677026	0	AFR;EAS;EUR
chr1	34435344	33969743	rs59698517	chr1_2	rs531066,rs6677026	0	AFR;EAS;EUR
chr1	34435411	33969810	rs3841824	chr1_2	rs531066,rs6677026	0	AFR;EAS;EUR
chr1	34435483	33969882	rs3738343	chr1_2	rs531066,rs6677026	0	AFR;EAS;EUR
chr1	34435637	33970036	rs3738344	chr1_2	rs531066,rs6677026	0	AFR;EAS;EUR
chr1	34436438	33970837	rs61769940	chr1_2	rs531066,rs6677026	0	AFR;EAS;EUR
chr1	34436952	33971351	rs56810021	chr1_2	rs531066,rs6677026	0	AFR;EAS;EUR
chr1	34436957	33971356	rs531066	chr1_2	rs531066,rs6677026	1	AFR;EAS;EUR
chr1	34437060	33971459	rs532016	chr1_2	rs531066,rs6677026	0	EUR
chr1	34437291	33971690	rs6676308	chr1_2	rs531066,rs6677026	0	AFR;EAS;EUR
chr1	34438078	33972477	rs473450	chr1_2	rs531066,rs6677026	0	EUR
chr1	34438333	33972732	rs58456376	chr1_2	rs531066,rs6677026	0	AFR;EAS;EUR
chr1	34438525	33972924	rs35745309	chr1_2	rs531066,rs6677026	0	EUR
chr1	34438881	33973280	rs502199	chr1_2	rs531066,rs6677026	0	EUR
chr1	34439294	33973693	rs506546	chr1_2	rs531066,rs6677026	0	EUR
chr1	34439362	33973761	rs506714	chr1_2	rs531066,rs6677026	0	EUR
chr1	34439500	33973899	rs519661	chr1_2	rs531066,rs6677026	0	EUR
chr1	34439842	33974241	rs544234	chr1_2	rs531066,rs6677026	0	EUR
chr1	34440024	33974423	rs546002	chr1_2	rs531066,rs6677026	0	EUR
chr1	34440316	33974715	rs536766	chr1_2	rs531066,rs6677026	0	AFR;EAS;EUR
chr1	34440412	33974811	rs6677026	chr1_2	rs531066,rs6677026	1	AFR;EAS;EUR
chr1	34440545	33974944	rs6671099	chr1_2	rs531066,rs6677026	0	EAS;EUR
chr1	34441542	33975941	rs55738811	chr1_2	rs531066,rs6677026	0	AFR;EAS;EUR
chr1	34442125	33976524	rs1325254	chr1_2	rs531066,rs6677026	0	EAS;EUR
chr1	34443228	33977627	rs516237	chr1_2	rs531066,rs6677026	0	EUR
chr1	34444094	33978493	rs556878	chr1_2	rs531066,rs6677026	0	EUR
chr1	34444230	33978629	rs12127584	chr1_2	rs531066,rs6677026	0	EAS;EUR
chr1	34444870	33979269	rs496755	chr1_2	rs531066,rs6677026	0	EUR
chr1	34444969	33979368	rs12125152	chr1_2	rs531066,rs6677026	0	EAS
chr1	34446910	33981309	rs535574	chr1_2	rs531066,rs6677026	0	EUR
chr1	34447698	33982097	rs1325255	chr1_2	rs531066,rs6677026	0	AFR;EUR
chr1	34461174	33995573	rs16836161	chr1_2	rs531066,rs6677026	0	EUR
chr1	34462829	33997228	rs7525205	chr1_2	rs531066,rs6677026	0	EUR
chr1	34463367	33997766	rs59738400	chr1_2	rs531066,rs6677026	0	EUR
chr1	34465163	33999562	rs34721676	chr1_2	rs531066,rs6677026	0	EUR
chr1	34471559	34005958	rs7514746	chr1_2	rs531066,rs6677026	0	EUR
chr1	34475144	34009543	rs55778159	chr1_2	rs531066,rs6677026	0	EUR
chr1	72126385	71660702	rs11209813	chr1_3	rs11209813,rs2422014	1	AFR
chr1	72126388	71660705	rs2422014	chr1_3	rs11209813,rs2422014	1	AFR;EAS;EUR
chr1	72134396	71668713	rs7521469	chr1_3	rs11209813,rs2422014	0	EUR
chr1	72134585	71668902	rs7531932	chr1_3	rs11209813,rs2422014	0	EUR
chr1	72136346	71670663	rs10889924	chr1_3	rs11209813,rs2422014	0	EUR
chr1	72153334	71687651	rs10789321	chr1_3	rs11209813,rs2422014	0	EUR
chr1	157704626	157734836	rs16839014	chr1_4	rs16839017,rs55801926	0	AFR;EUR
chr1	157705809	157736019	rs113903182	chr1_4	rs16839017,rs55801926	0	AFR;EUR
chr1	157706849	157737059	rs57394292	chr1_4	rs16839017,rs55801926	0	AFR;EUR
chr1	157707363	157737573	rs111685377	chr1_4	rs16839017,rs55801926	0	AFR;EUR
chr1	157709761	157739971	rs74119641	chr1_4	rs16839017,rs55801926	0	AFR;EUR
chr1	157710069	157740279	rs74119642	chr1_4	rs16839017,rs55801926	0	AFR;EUR
chr1	157710599	157740809	rs2210919	chr1_4	rs16839017,rs55801926	0	AFR;EUR
chr1	157710706	157740916	rs9427307	chr1_4	rs16839017,rs55801926	0	AFR;EUR
chr1	157711699	157741909	rs6413891	chr1_4	rs16839017,rs55801926	0	AFR;EUR
chr1	157712165	157742375	rs74119644	chr1_4	rs16839017,rs55801926	0	AFR;EUR
chr1	157712478	157742688	rs9427308	chr1_4	rs16839017,rs55801926	0	AFR;EUR
chr1	157712594	157742804	rs9427309	chr1_4	rs16839017,rs55801926	0	AFR;EUR
chr1	157713259	157743469	rs9426987	chr1_4	rs16839017,rs55801926	0	AFR;EUR
chr1	157713326	157743536	rs9427310	chr1_4	rs16839017,rs55801926	0	AFR;EUR
chr1	157714235	157744445	rs6703735	chr1_4	rs16839017,rs55801926	0	AFR
chr1	157714461	157744671	rs6703947	chr1_4	rs16839017,rs55801926	0	AFR;EUR
chr1	157714593	157744803	rs9427311	chr1_4	rs16839017,rs55801926	0	AFR
chr1	157715008	157745218	rs79601439	chr1_4	rs16839017,rs55801926	0	AFR;EUR
chr1	157715177	157745387	rs112074083	chr1_4	rs16839017,rs55801926	0	AFR;EUR
chr1	157715344	157745554	rs77797857	chr1_4	rs16839017,rs55801926	0	AFR;EUR
chr1	157715434	157745644	rs78470362	chr1_4	rs16839017,rs55801926	0	AFR;EUR
chr1	157715834	157746044	rs75534020	chr1_4	rs16839017,rs55801926	0	AFR;EUR
chr1	157716400	157746610	rs60958519	chr1_4	rs16839017,rs55801926	0	AFR;EUR
chr1	157716579	157746789	rs56179831	chr1_4	rs16839017,rs55801926	0	AFR;EUR
chr1	157716592	157746802	rs16839017	chr1_4	rs16839017,rs55801926	1	AFR;EUR
chr1	157716620	157746830	rs74119648	chr1_4	rs16839017,rs55801926	0	AFR;EUR
chr1	157716724	157746934	rs16839018	chr1_4	rs16839017,rs55801926	0	AFR;EUR
chr1	157716903	157747113	rs16839020	chr1_4	rs16839017,rs55801926	0	AFR;EUR
chr1	157716974	157747184	rs61321087	chr1_4	rs16839017,rs55801926	0	AFR;EUR
chr1	157717067	157747277	rs16839024	chr1_4	rs16839017,rs55801926	0	AFR;EUR
chr1	157717574	157747784	rs55801926	chr1_4	rs16839017,rs55801926	1	AFR;EUR
chr1	157717667	157747877	rs16839027	chr1_4	rs16839017,rs55801926	0	AFR;EUR
chr1	157717785	157747995	rs16839029	chr1_4	rs16839017,rs55801926	0	AFR;EUR
chr1	157717810	157748020	rs56180806	chr1_4	rs16839017,rs55801926	0	AFR;EUR
chr1	157717831	157748041	rs56706837	chr1_4	rs16839017,rs55801926	0	AFR;EUR
chr1	157717894	157748104	rs16839030	chr1_4	rs16839017,rs55801926	0	AFR;EUR
chr1	157734019	157764229	rs6687313	chr1_4	rs16839017,rs55801926	0	AFR;EUR
chr1	172610350	172641210	rs74124267	chr1_5	rs74124362,rs74124368	0	AFR
chr1	172611567	172642427	rs56231791	chr1_5	rs74124362,rs74124368	0	AFR
chr1	172612397	172643257	rs74124362	chr1_5	rs74124362,rs74124368	1	AFR
chr1	172612842	172643702	rs74124363	chr1_5	rs74124362,rs74124368	0	AFR
chr1	172612922	172643782	rs74124364	chr1_5	rs74124362,rs74124368	0	AFR
chr1	172613585	172644445	rs74124365	chr1_5	rs74124362,rs74124368	0	AFR
chr1	172614161	172645021	rs74124366	chr1_5	rs74124362,rs74124368	0	AFR
chr1	172614249	172645109	rs74124367	chr1_5	rs74124362,rs74124368	0	AFR
chr1	172615497	172646357	rs74124368	chr1_5	rs74124362,rs74124368	1	AFR
chr1	172616364	172647224	rs61126230	chr1_5	rs74124362,rs74124368	0	AFR
chr1	172620606	172651466	rs74124370	chr1_5	rs74124362,rs74124368	0	AFR
chr1	172621880	172652740	rs57179501	chr1_5	rs74124362,rs74124368	0	AFR
chr1	172626143	172657003	rs60675946	chr1_5	rs74124362,rs74124368	0	AFR
chr1	179247035	179277900	rs140669397	chr1_6	rs79870021,rs6670562	0	AFR
chr1	179248440	179279305	rs145882227	chr1_6	rs79870021,rs6670562	0	AFR
chr1	179250928	179281793	rs145335040	chr1_6	rs79870021,rs6670562	0	AFR
chr1	179274319	179305184	rs75506658	chr1_6	rs79870021,rs6670562	0	AFR
chr1	179274580	179305445	rs116645952	chr1_6	rs79870021,rs6670562	0	AFR
chr1	179276338	179307203	rs75410914	chr1_6	rs79870021,rs6670562	0	AFR
chr1	179277556	179308421	rs6701744	chr1_6	rs79870021,rs6670562	0	AFR
chr1	179283903	179314768	rs116213272	chr1_6	rs79870021,rs6670562	0	AFR
chr1	179287755	179318620	rs144925103	chr1_6	rs79870021,rs6670562	0	AFR
chr1	179294186	179325051	rs147506011	chr1_6	rs79870021,rs6670562	0	AFR
chr1	179296516	179327381	rs79870021	chr1_6	rs79870021,rs6670562	1	AFR
chr1	179297199	179328064	rs76095309	chr1_6	rs79870021,rs6670562	0	AFR
chr1	179300294	179331159	rs6670562	chr1_6	rs79870021,rs6670562	1	AFR
chr1	179301696	179332561	rs148386371	chr1_6	rs79870021,rs6670562	0	AFR
chr1	179310313	179341178	rs78218236	chr1_6	rs79870021,rs6670562	0	AFR
chr1	205408405	205439277	rs6696979	chr1_7	rs74141214,rs74141215	0	EAS
chr1	205408903	205439775	rs6657330	chr1_7	rs74141214,rs74141215	0	EAS
chr1	205408911	205439783	rs6682598	chr1_7	rs74141214,rs74141215	0	EAS
chr1	205410014	205440886	rs6661017	chr1_7	rs74141214,rs74141215	0	EAS
chr1	205413479	205444351	rs74141214	chr1_7	rs74141214,rs74141215	1	AFR;EAS;EUR
chr1	205414723	205445595	rs34785653	chr1_7	rs74141214,rs74141215	0	EAS
chr1	205415348	205446220	rs10793730	chr1_7	rs74141214,rs74141215	0	EAS;EUR
chr1	205416776	205447648	rs74141215	chr1_7	rs74141214,rs74141215	1	AFR;EUR
chr1	205416877	205447749	rs74877853	chr1_7	rs74141214,rs74141215	0	EUR
chr1	237795275	237631975	rs1759119	chr1_8	rs1717782,rs10925477	0	EAS
chr1	237795496	237632196	rs1717782	chr1_8	rs1717782,rs10925477	1	AFR;EAS;EUR
chr1	237796092	237632792	rs476078	chr1_8	rs1717782,rs10925477	0	EAS
chr1	237796276	237632976	rs10925477	chr1_8	rs1717782,rs10925477	1	AFR;EAS;EUR
chr1	237796529	237633229	rs116234420	chr1_8	rs1717782,rs10925477	0	EAS;EUR
chr1	237797452	237634152	rs11585501	chr1_8	rs1717782,rs10925477	0	EAS;EUR
chr2	10380851	10240725	rs181714159	chr2_9	rs11681155,rs11888584	0	EAS;EUR
chr2	10380853	10240727	rs73914008	chr2_9	rs11681155,rs11888584	0	EAS;EUR
chr2	10380949	10240823	rs115601640	chr2_9	rs11681155,rs11888584	0	EAS;EUR
chr2	10380950	10240824	rs116156044	chr2_9	rs11681155,rs11888584	0	EAS;EUR
chr2	10380953	10240827	rs112701453	chr2_9	rs11681155,rs11888584	0	EAS;EUR
chr2	10381434	10241308	rs1468780	chr2_9	rs11681155,rs11888584	0	EAS;EUR
chr2	10382075	10241949	rs76042374	chr2_9	rs11681155,rs11888584	0	EAS;EUR
chr2	10382670	10242544	rs55785202	chr2_9	rs11681155,rs11888584	0	AFR;EAS;EUR
chr2	10383430	10243304	rs16856016	chr2_9	rs11681155,rs11888584	0	AFR;EAS;EUR
chr2	10383577	10243451	rs56000347	chr2_9	rs11681155,rs11888584	0	AFR;EAS;EUR
chr2	10383603	10243477	rs55797729	chr2_9	rs11681155,rs11888584	0	EAS;EUR
chr2	10383763	10243637	rs11681155	chr2_9	rs11681155,rs11888584	1	AFR;EAS;EUR
chr2	10383888	10243762	rs11682323	chr2_9	rs11681155,rs11888584	0	EAS;EUR
chr2	10384245	10244119	rs59710729	chr2_9	rs11681155,rs11888584	0	EAS;EUR
chr2	10384289	10244163	rs16856020	chr2_9	rs11681155,rs11888584	0	EAS;EUR
chr2	10384331	10244205	rs55787423	chr2_9	rs11681155,rs11888584	0	EAS;EUR
chr2	10384723	10244597	rs56149361	chr2_9	rs11681155,rs11888584	0	EAS;EUR
chr2	10385847	10245721	rs62127656	chr2_9	rs11681155,rs11888584	0	EUR
chr2	10386410	10246284	rs11688174	chr2_9	rs11681155,rs11888584	0	AFR;EAS;EUR
chr2	10386688	10246562	rs11677554	chr2_9	rs11681155,rs11888584	0	EAS;EUR
chr2	10387311	10247185	rs11888584	chr2_9	rs11681155,rs11888584	1	AFR;EAS;EUR
chr2	10388429	10248303	rs7576926	chr2_9	rs11681155,rs11888584	0	EAS;EUR
chr2	10388670	10248544	rs56306950	chr2_9	rs11681155,rs11888584	0	EAS;EUR
chr2	10391226	10251100	rs36122218	chr2_9	rs11681155,rs11888584	0	EAS;EUR
chr2	10392798	10252672	rs73914014	chr2_9	rs11681155,rs11888584	0	EAS;EUR
chr2	10392977	10252851	rs7580449	chr2_9	rs11681155,rs11888584	0	EAS;EUR
chr2	10393038	10252912	rs7583344	chr2_9	rs11681155,rs11888584	0	EAS;EUR
chr2	10393875	10253749	rs1468781	chr2_9	rs11681155,rs11888584	0	EAS
chr2	10393876	10253750	rs1468782	chr2_9	rs11681155,rs11888584	0	EAS
chr2	10394348	10254222	rs17379489	chr2_9	rs11681155,rs11888584	0	EAS
chr2	10394490	10254364	rs11695911	chr2_9	rs11681155,rs11888584	0	EAS
chr2	10394652	10254526	rs11690100	chr2_9	rs11681155,rs11888584	0	EAS
chr2	64626932	64399798	rs60812670	chr2_10	rs2160947,rs114431418	0	EUR
chr2	64628181	64401047	rs34273740	chr2_10	rs2160947,rs114431418	0	EAS
chr2	64628311	64401177	rs2160947	chr2_10	rs2160947,rs114431418	1	AFR;EAS;EUR
chr2	64628774	64401640	rs6726733	chr2_10	rs2160947,rs114431418	0	EAS
chr2	64628775	64401641	rs6726734	chr2_10	rs2160947,rs114431418	0	EAS
chr2	64629674	64402540	rs114431418	chr2_10	rs2160947,rs114431418	1	AFR
chr2	64629869	64402735	rs11892114	chr2_10	rs2160947,rs114431418	0	EAS
chr2	64629989	64402855	rs59647975	chr2_10	rs2160947,rs114431418	0	EUR
chr2	64630299	64403165	rs872241	chr2_10	rs2160947,rs114431418	0	EAS
chr2	64634143	64407009	rs7564687	chr2_10	rs2160947,rs114431418	0	EAS
chr2	64635107	64407973	rs142619370	chr2_10	rs2160947,rs114431418	0	EAS;EUR
chr2	64635131	64407997	rs7582500	chr2_10	rs2160947,rs114431418	0	EAS
chr2	64635466	64408332	rs3902832	chr2_10	rs2160947,rs114431418	0	EAS
chr2	64637171	64410037	rs868984	chr2_10	rs2160947,rs114431418	0	AFR;EAS;EUR
chr2	64637228	64410094	rs868985	chr2_10	rs2160947,rs114431418	0	AFR;EAS;EUR
chr2	64637502	64410368	rs868986	chr2_10	rs2160947,rs114431418	0	AFR;EAS;EUR
chr2	64638073	64410939	rs13414949	chr2_10	rs2160947,rs114431418	0	EAS;EUR
chr2	64638814	64411680	rs67359657	chr2_10	rs2160947,rs114431418	0	EAS;EUR
chr2	64639942	64412808	rs2058958	chr2_10	rs2160947,rs114431418	0	EAS
chr2	64640845	64413711	rs10178664	chr2_10	rs2160947,rs114431418	0	EAS;EUR
chr2	64641714	64414580	rs6713860	chr2_10	rs2160947,rs114431418	0	EAS;EUR
chr2	64641736	64414602	rs11676644	chr2_10	rs2160947,rs114431418	0	EUR
chr2	64641801	64414667	rs11676689	chr2_10	rs2160947,rs114431418	0	EUR
chr2	69028005	68800873	rs13006106	chr2_11	rs11126199,rs78410209	0	AFR;EAS;EUR
chr2	69028585	68801453	rs7585846	chr2_11	rs11126199,rs78410209	0	AFR;EAS;EUR
chr2	69028589	68801457	rs7585849	chr2_11	rs11126199,rs78410209	0	AFR;EAS;EUR
chr2	69028821	68801689	rs11889350	chr2_11	rs11126199,rs78410209	0	AFR;EAS;EUR
chr2	69029215	68802083	rs13018928	chr2_11	rs11126199,rs78410209	0	AFR;EAS;EUR
chr2	69029360	68802228	rs72504710	chr2_11	rs11126199,rs78410209	0	AFR;EAS;EUR
chr2	69029690	68802558	rs6712120	chr2_11	rs11126199,rs78410209	0	AFR;EAS;EUR
chr2	69029707	68802575	rs4854457	chr2_11	rs11126199,rs78410209	0	AFR;EAS;EUR
chr2	69030110	68802978	rs200761745	chr2_11	rs11126199,rs78410209	0	AFR;EAS;EUR
chr2	69031128	68803996	rs11126199	chr2_11	rs11126199,rs78410209	1	AFR;EAS;EUR
chr2	69031778	68804646	rs10187087	chr2_11	rs11126199,rs78410209	0	EAS;EUR
chr2	69034730	68807598	rs78410209	chr2_11	rs11126199,rs78410209	1	AFR
chr2	77928155	77701029	rs112641270	chr2_12	rs77459392,rs10179376	0	EAS
chr2	77932189	77705063	rs78916430	chr2_12	rs77459392,rs10179376	0	EAS;EUR
chr2	77935129	77708003	rs11687583	chr2_12	rs77459392,rs10179376	0	EAS;EUR
chr2	77935502	77708376	rs145777055	chr2_12	rs77459392,rs10179376	0	EAS;EUR
chr2	77936699	77709573	rs78180086	chr2_12	rs77459392,rs10179376	0	EAS;EUR
chr2	77938611	77711485	rs1487032	chr2_12	rs77459392,rs10179376	0	EAS;EUR
chr2	77942253	77715127	rs78527309	chr2_12	rs77459392,rs10179376	0	EAS;EUR
chr2	77949474	77722348	rs12328279	chr2_12	rs77459392,rs10179376	0	AFR;EAS;EUR
chr2	77949746	77722620	rs77459392	chr2_12	rs77459392,rs10179376	1	AFR;EAS;EUR
chr2	77949786	77722660	rs28648913	chr2_12	rs77459392,rs10179376	0	AFR;EAS;EUR
chr2	77950401	77723275	rs10179376	chr2_12	rs77459392,rs10179376	1	AFR;EAS;EUR
chr2	77951609	77724483	rs11126632	chr2_12	rs77459392,rs10179376	0	AFR;EUR
chr2	77951629	77724503	rs11126633	chr2_12	rs77459392,rs10179376	0	AFR;EUR
chr2	77951766	77724640	rs10183062	chr2_12	rs77459392,rs10179376	0	AFR;EUR
chr2	77952515	77725389	rs80105462	chr2_12	rs77459392,rs10179376	0	AFR;EAS;EUR
chr2	77953671	77726545	rs115470622	chr2_12	rs77459392,rs10179376	0	AFR;EAS;EUR
chr2	77955699	77728573	rs11691503	chr2_12	rs77459392,rs10179376	0	AFR;EAS;EUR
chr2	77959173	77732047	rs200723090	chr2_12	rs77459392,rs10179376	0	AFR;EAS;EUR
chr2	77959658	77732532	rs78876578	chr2_12	rs77459392,rs10179376	0	AFR;EAS;EUR
chr2	77961184	77734058	rs139132607	chr2_12	rs77459392,rs10179376	0	AFR;EAS;EUR
chr2	77962055	77734929	rs116468567	chr2_12	rs77459392,rs10179376	0	EAS;EUR
chr2	77962236	77735110	rs10166757	chr2_12	rs77459392,rs10179376	0	EAS;EUR
chr2	77962370	77735244	rs190779269	chr2_12	rs77459392,rs10179376	0	AFR;EAS;EUR
chr2	77962371	77735245	rs183384176	chr2_12	rs77459392,rs10179376	0	AFR;EAS;EUR
chr2	77962431	77735305	rs10201728	chr2_12	rs77459392,rs10179376	0	EAS;EUR
chr2	77963340	77736214	rs10181301	chr2_12	rs77459392,rs10179376	0	EAS;EUR
chr2	77963529	77736403	rs68156237	chr2_12	rs77459392,rs10179376	0	EAS;EUR
chr2	77963665	77736539	rs10205329	chr2_12	rs77459392,rs10179376	0	EAS;EUR
chr2	77963913	77736787	rs28688255	chr2_12	rs77459392,rs10179376	0	EAS;EUR
chr2	77964131	77737005	rs28656949	chr2_12	rs77459392,rs10179376	0	EAS;EUR
chr2	77964133	77737007	rs28577993	chr2_12	rs77459392,rs10179376	0	EAS;EUR
chr2	77964201	77737075	rs28625977	chr2_12	rs77459392,rs10179376	0	EAS;EUR
chr2	77972359	77745233	rs79101664	chr2_12	rs77459392,rs10179376	0	EAS;EUR
chr2	77972735	77745609	rs371809325	chr2_12	rs77459392,rs10179376	0	AFR;EAS;EUR
chr2	77974605	77747479	rs56006143	chr2_12	rs77459392,rs10179376	0	AFR;EAS;EUR
chr2	77974973	77747847	rs115577354	chr2_12	rs77459392,rs10179376	0	AFR;EAS;EUR
chr2	77980470	77753344	rs10179533	chr2_12	rs77459392,rs10179376	0	EAS;EUR
chr2	77980691	77753565	rs13398413	chr2_12	rs77459392,rs10179376	0	EAS;EUR
chr2	77980913	77753787	rs13398656	chr2_12	rs77459392,rs10179376	0	EAS;EUR
chr2	77982163	77755037	rs138059446	chr2_12	rs77459392,rs10179376	0	EAS;EUR
chr2	77982385	77755259	rs370899720	chr2_12	rs77459392,rs10179376	0	EUR
chr2	77982425	77755299	rs374556738	chr2_12	rs77459392,rs10179376	0	EUR
chr2	77982642	77755516	rs376058388	chr2_12	rs77459392,rs10179376	0	EUR
chr2	77983019	77755893	rs377259710	chr2_12	rs77459392,rs10179376	0	EAS;EUR
chr2	77984477	77757351	rs377204224	chr2_12	rs77459392,rs10179376	0	EUR
chr2	77990220	77763094	rs76509088	chr2_12	rs77459392,rs10179376	0	EAS;EUR
chr2	77993982	77766856	rs149894262	chr2_12	rs77459392,rs10179376	0	EAS;EUR
chr2	77994100	77766974	rs114219065	chr2_12	rs77459392,rs10179376	0	EAS;EUR
chr2	77994871	77767745	rs75306509	chr2_12	rs77459392,rs10179376	0	EAS;EUR
chr2	77994889	77767763	rs142428248	chr2_12	rs77459392,rs10179376	0	EAS;EUR
chr2	77995667	77768541	rs150080461	chr2_12	rs77459392,rs10179376	0	AFR;EAS;EUR
chr2	77995980	77768854	rs11691233	chr2_12	rs77459392,rs10179376	0	EAS;EUR
chr2	78018164	77791038	rs11688027	chr2_12	rs77459392,rs10179376	0	EUR
chr2	78022253	77795127	rs375312965	chr2_12	rs77459392,rs10179376	0	EUR
chr2	83372199	83145075	rs112427654	chr2_13	rs2163254,rs12477109	0	EUR
chr2	83373094	83145970	rs1430288	chr2_13	rs2163254,rs12477109	0	EUR
chr2	83373194	83146070	rs1430287	chr2_13	rs2163254,rs12477109	0	EUR
chr2	83374170	83147046	rs62147145	chr2_13	rs2163254,rs12477109	0	EUR
chr2	83375090	83147966	rs372474212	chr2_13	rs2163254,rs12477109	0	EUR
chr2	83376593	83149469	rs77991682	chr2_13	rs2163254,rs12477109	0	EUR
chr2	83376731	83149607	rs200229979	chr2_13	rs2163254,rs12477109	0	EUR
chr2	83377125	83150001	rs72838916	chr2_13	rs2163254,rs12477109	0	EUR
chr2	83378207	83151083	rs1430271	chr2_13	rs2163254,rs12477109	0	EUR
chr2	83378922	83151798	rs1036026	chr2_13	rs2163254,rs12477109	0	EUR
chr2	83383240	83156116	rs12619220	chr2_13	rs2163254,rs12477109	0	EUR
chr2	83385602	83158478	rs148222805	chr2_13	rs2163254,rs12477109	0	EUR
chr2	83386258	83159134	rs11126889	chr2_13	rs2163254,rs12477109	0	EUR
chr2	83389535	83162411	rs12621973	chr2_13	rs2163254,rs12477109	0	EAS;EUR
chr2	83390652	83163528	rs6744085	chr2_13	rs2163254,rs12477109	0	EAS;EUR
chr2	83391245	83164121	rs1430278	chr2_13	rs2163254,rs12477109	0	EAS;EUR
chr2	83392185	83165061	rs17314018	chr2_13	rs2163254,rs12477109	0	EAS;EUR
chr2	83394144	83167020	rs5832562	chr2_13	rs2163254,rs12477109	0	EUR
chr2	83395148	83168024	rs75300234	chr2_13	rs2163254,rs12477109	0	AFR;EAS;EUR
chr2	83395162	83168038	rs62148965	chr2_13	rs2163254,rs12477109	0	AFR;EAS;EUR
chr2	83395175	83168051	rs62148966	chr2_13	rs2163254,rs12477109	0	AFR;EAS;EUR
chr2	83395285	83168161	rs17314045	chr2_13	rs2163254,rs12477109	0	AFR;EAS;EUR
chr2	83395498	83168374	rs17379698	chr2_13	rs2163254,rs12477109	0	AFR;EAS;EUR
chr2	83396514	83169390	rs72838924	chr2_13	rs2163254,rs12477109	0	AFR;EAS;EUR
chr2	83396951	83169827	rs6718603	chr2_13	rs2163254,rs12477109	0	AFR;EAS;EUR
chr2	83397136	83170012	rs57172121	chr2_13	rs2163254,rs12477109	0	EAS;EUR
chr2	83397312	83170188	rs57904284	chr2_13	rs2163254,rs12477109	0	EAS;EUR
chr2	83399118	83171994	rs7606192	chr2_13	rs2163254,rs12477109	0	AFR;EAS;EUR
chr2	83399578	83172454	rs36080260	chr2_13	rs2163254,rs12477109	0	EUR
chr2	83399582	83172458	rs35708555	chr2_13	rs2163254,rs12477109	0	EAS;EUR
chr2	83401287	83174163	rs6709321	chr2_13	rs2163254,rs12477109	0	AFR;EAS;EUR
chr2	83401461	83174337	rs6724724	chr2_13	rs2163254,rs12477109	0	AFR;EAS;EUR
chr2	83401576	83174452	rs6738335	chr2_13	rs2163254,rs12477109	0	AFR;EAS;EUR
chr2	83401704	83174580	rs6709836	chr2_13	rs2163254,rs12477109	0	AFR;EAS;EUR
chr2	83403816	83176692	rs12617148	chr2_13	rs2163254,rs12477109	0	EAS;EUR
chr2	83404227	83177103	rs12613068	chr2_13	rs2163254,rs12477109	0	AFR;EAS;EUR
chr2	83405451	83178327	rs72838929	chr2_13	rs2163254,rs12477109	0	AFR;EAS;EUR
chr2	83406323	83179199	rs7573857	chr2_13	rs2163254,rs12477109	0	AFR;EAS;EUR
chr2	83407967	83180843	rs12477109	chr2_13	rs2163254,rs12477109	1	AFR;EAS;EUR
chr2	83408452	83181328	rs2163254	chr2_13	rs2163254,rs12477109	1	AFR;EAS;EUR
chr2	83410336	83183212	rs11126891	chr2_13	rs2163254,rs12477109	0	EAS;EUR
chr2	83411969	83184845	rs58322215	chr2_13	rs2163254,rs12477109	0	EAS;EUR
chr2	83413307	83186183	rs72838938	chr2_13	rs2163254,rs12477109	0	AFR;EAS;EUR
chr2	83413547	83186423	rs36000677	chr2_13	rs2163254,rs12477109	0	EAS;EUR
chr2	83414121	83186997	rs1346804	chr2_13	rs2163254,rs12477109	0	AFR;EAS;EUR
chr2	83414865	83187741	rs1560378	chr2_13	rs2163254,rs12477109	0	AFR;EAS;EUR
chr2	83415080	83187956	rs1019837	chr2_13	rs2163254,rs12477109	0	EAS;EUR
chr2	83417470	83190346	rs11126892	chr2_13	rs2163254,rs12477109	0	EAS;EUR
chr2	83417876	83190752	rs58931213	chr2_13	rs2163254,rs12477109	0	AFR;EAS;EUR
chr2	83418946	83191822	rs985698	chr2_13	rs2163254,rs12477109	0	EAS;EUR
chr2	83420481	83193357	rs1430284	chr2_13	rs2163254,rs12477109	0	EAS;EUR
chr2	83421762	83194638	rs12617395	chr2_13	rs2163254,rs12477109	0	EAS;EUR
chr2	83423148	83196024	rs62149011	chr2_13	rs2163254,rs12477109	0	EAS;EUR
chr2	83424531	83197407	rs1430286	chr2_13	rs2163254,rs12477109	0	EAS;EUR
chr2	83425003	83197879	rs10496296	chr2_13	rs2163254,rs12477109	0	EAS;EUR
chr2	83425161	83198037	rs6757249	chr2_13	rs2163254,rs12477109	0	EAS;EUR
chr2	83425279	83198155	rs6742214	chr2_13	rs2163254,rs12477109	0	EAS;EUR
chr2	83426021	83198897	rs11126893	chr2_13	rs2163254,rs12477109	0	EAS;EUR
chr2	83426074	83198950	rs71390129	chr2_13	rs2163254,rs12477109	0	EAS;EUR
chr2	83429450	83202326	rs62149019	chr2_13	rs2163254,rs12477109	0	EAS;EUR
chr2	83429812	83202688	rs12619751	chr2_13	rs2163254,rs12477109	0	EAS;EUR
chr2	83429829	83202705	rs12619752	chr2_13	rs2163254,rs12477109	0	EAS;EUR
chr2	83430900	83203776	rs6721217	chr2_13	rs2163254,rs12477109	0	EAS;EUR
chr2	83431608	83204484	rs35446429	chr2_13	rs2163254,rs12477109	0	EAS;EUR
chr2	83434138	83207014	rs10865465	chr2_13	rs2163254,rs12477109	0	EAS;EUR
chr2	83435211	83208087	rs7421026	chr2_13	rs2163254,rs12477109	0	EAS;EUR
chr2	83435876	83208752	rs11684221	chr2_13	rs2163254,rs12477109	0	EAS;EUR
chr2	83436237	83209113	rs11126894	chr2_13	rs2163254,rs12477109	0	EAS;EUR
chr2	83437119	83209995	rs6740420	chr2_13	rs2163254,rs12477109	0	EAS;EUR
chr2	83440001	83212877	rs6547462	chr2_13	rs2163254,rs12477109	0	EAS;EUR
chr2	83440222	83213098	rs6547463	chr2_13	rs2163254,rs12477109	0	EAS;EUR
chr2	83440560	83213436	rs12992129	chr2_13	rs2163254,rs12477109	0	EAS;EUR
chr2	83441865	83214741	rs7579273	chr2_13	rs2163254,rs12477109	0	EAS;EUR
chr2	83441911	83214787	rs7579174	chr2_13	rs2163254,rs12477109	0	EAS;EUR
chr2	83442112	83214988	rs7595968	chr2_13	rs2163254,rs12477109	0	EAS;EUR
chr2	83442194	83215070	rs7596070	chr2_13	rs2163254,rs12477109	0	EAS;EUR
chr2	83444530	83217406	rs12623818	chr2_13	rs2163254,rs12477109	0	EAS;EUR
chr2	83448843	83221719	rs11679279	chr2_13	rs2163254,rs12477109	0	EAS;EUR
chr2	83448873	83221749	rs10865466	chr2_13	rs2163254,rs12477109	0	EAS;EUR
chr2	83448918	83221794	rs10713686	chr2_13	rs2163254,rs12477109	0	EAS;EUR
chr2	83450369	83223245	rs6743572	chr2_13	rs2163254,rs12477109	0	EAS;EUR
chr2	83451473	83224349	rs34287432	chr2_13	rs2163254,rs12477109	0	EAS;EUR
chr2	83451824	83224700	rs34800812	chr2_13	rs2163254,rs12477109	0	EAS;EUR
chr2	83452414	83225290	rs12989060	chr2_13	rs2163254,rs12477109	0	EAS;EUR
chr2	83457558	83230434	rs9309600	chr2_13	rs2163254,rs12477109	0	EAS;EUR
chr2	83458510	83231386	rs12464730	chr2_13	rs2163254,rs12477109	0	EAS;EUR
chr2	83458831	83231707	rs12464780	chr2_13	rs2163254,rs12477109	0	EAS;EUR
chr2	83459230	83232106	rs12613324	chr2_13	rs2163254,rs12477109	0	EAS;EUR
chr2	83459383	83232259	rs191967546	chr2_13	rs2163254,rs12477109	0	EAS;EUR
chr2	83460109	83232985	rs6547467	chr2_13	rs2163254,rs12477109	0	EAS;EUR
chr2	83460869	83233745	rs36099386	chr2_13	rs2163254,rs12477109	0	EAS;EUR
chr2	83461519	83234395	rs9636448	chr2_13	rs2163254,rs12477109	0	EAS;EUR
chr2	83462079	83234955	rs9636449	chr2_13	rs2163254,rs12477109	0	EAS;EUR
chr2	83463134	83236010	rs12470240	chr2_13	rs2163254,rs12477109	0	EAS;EUR
chr2	83463366	83236242	rs12474534	chr2_13	rs2163254,rs12477109	0	EAS;EUR
chr2	83463806	83236682	rs34265053	chr2_13	rs2163254,rs12477109	0	EAS;EUR
chr2	83463936	83236812	rs72513104	chr2_13	rs2163254,rs12477109	0	EAS;EUR
chr2	83464860	83237736	rs7605657	chr2_13	rs2163254,rs12477109	0	EAS;EUR
chr2	83465815	83238691	rs141073461	chr2_13	rs2163254,rs12477109	0	EAS;EUR
chr2	83466519	83239395	rs13013526	chr2_13	rs2163254,rs12477109	0	EAS;EUR
chr2	83466934	83239810	rs34081768	chr2_13	rs2163254,rs12477109	0	EAS;EUR
chr2	83466990	83239866	rs35753991	chr2_13	rs2163254,rs12477109	0	EAS;EUR
chr2	83467557	83240433	rs7577702	chr2_13	rs2163254,rs12477109	0	EAS;EUR
chr2	83467585	83240461	rs7563837	chr2_13	rs2163254,rs12477109	0	EAS;EUR
chr2	83469302	83242178	rs11126895	chr2_13	rs2163254,rs12477109	0	EAS;EUR
chr2	83469324	83242200	rs11126896	chr2_13	rs2163254,rs12477109	0	EAS;EUR
chr2	83469446	83242322	rs11126897	chr2_13	rs2163254,rs12477109	0	EAS;EUR
chr2	83469640	83242516	rs11126898	chr2_13	rs2163254,rs12477109	0	EAS;EUR
chr2	83469712	83242588	rs7585408	chr2_13	rs2163254,rs12477109	0	EAS;EUR
chr2	83470436	83243312	rs11691875	chr2_13	rs2163254,rs12477109	0	EAS;EUR
chr2	83470647	83243523	rs13018329	chr2_13	rs2163254,rs12477109	0	EAS;EUR
chr2	83471586	83244462	rs7605033	chr2_13	rs2163254,rs12477109	0	EAS;EUR
chr2	83471604	83244480	rs10587335	chr2_13	rs2163254,rs12477109	0	EAS;EUR
chr2	83471659	83244535	rs7592752	chr2_13	rs2163254,rs12477109	0	EAS;EUR
chr2	83472006	83244882	rs7422290	chr2_13	rs2163254,rs12477109	0	EAS;EUR
chr2	83472809	83245685	rs70949842	chr2_13	rs2163254,rs12477109	0	EAS;EUR
chr2	83473368	83246244	rs7423228	chr2_13	rs2163254,rs12477109	0	EAS;EUR
chr2	83473836	83246712	rs11126899	chr2_13	rs2163254,rs12477109	0	EAS;EUR
chr2	83474069	83246945	rs71275239	chr2_13	rs2163254,rs12477109	0	EAS;EUR
chr2	83474151	83247027	rs7420983	chr2_13	rs2163254,rs12477109	0	EAS;EUR
chr2	83474832	83247708	rs6547469	chr2_13	rs2163254,rs12477109	0	EAS;EUR
chr2	83475227	83248103	rs7421504	chr2_13	rs2163254,rs12477109	0	EAS;EUR
chr2	83475260	83248136	rs7421481	chr2_13	rs2163254,rs12477109	0	EAS;EUR
chr2	83475849	83248725	rs11126900	chr2_13	rs2163254,rs12477109	0	EAS;EUR
chr2	83475874	83248750	rs11126901	chr2_13	rs2163254,rs12477109	0	EAS;EUR
chr2	83475980	83248856	rs11126902	chr2_13	rs2163254,rs12477109	0	EAS;EUR
chr2	83476730	83249606	rs12622655	chr2_13	rs2163254,rs12477109	0	EAS;EUR
chr2	83476773	83249649	rs12622678	chr2_13	rs2163254,rs12477109	0	EAS;EUR
chr2	83476874	83249750	rs12619254	chr2_13	rs2163254,rs12477109	0	EAS;EUR
chr2	83476955	83249831	rs7422124	chr2_13	rs2163254,rs12477109	0	EAS;EUR
chr2	83477506	83250382	rs6759887	chr2_13	rs2163254,rs12477109	0	EAS;EUR
chr2	83478707	83251583	rs12621022	chr2_13	rs2163254,rs12477109	0	EAS;EUR
chr2	83479171	83252047	rs6754220	chr2_13	rs2163254,rs12477109	0	EAS;EUR
chr2	83479326	83252202	rs6739342	chr2_13	rs2163254,rs12477109	0	EAS;EUR
chr2	83479342	83252218	rs6739346	chr2_13	rs2163254,rs12477109	0	EAS;EUR
chr2	83479804	83252680	rs4129272	chr2_13	rs2163254,rs12477109	0	EAS
chr2	83480095	83252971	rs4129273	chr2_13	rs2163254,rs12477109	0	EAS
chr2	83481152	83254028	rs12623705	chr2_13	rs2163254,rs12477109	0	EAS
chr2	83482804	83255680	rs6547471	chr2_13	rs2163254,rs12477109	0	EAS;EUR
chr2	83483454	83256330	rs4075987	chr2_13	rs2163254,rs12477109	0	EAS
chr2	83483508	83256384	rs33941821	chr2_13	rs2163254,rs12477109	0	EAS
chr2	83483713	83256589	rs11126903	chr2_13	rs2163254,rs12477109	0	EAS;EUR
chr2	83484615	83257491	rs62147473	chr2_13	rs2163254,rs12477109	0	EAS
chr2	83485659	83258535	rs35268530	chr2_13	rs2163254,rs12477109	0	EAS
chr2	83486558	83259434	rs11126904	chr2_13	rs2163254,rs12477109	0	EAS
chr2	83488415	83261291	rs13009249	chr2_13	rs2163254,rs12477109	0	EAS
chr2	83489803	83262679	rs12612268	chr2_13	rs2163254,rs12477109	0	EAS
chr2	83491386	83264262	rs35916349	chr2_13	rs2163254,rs12477109	0	EAS
chr2	83491749	83264625	rs12470491	chr2_13	rs2163254,rs12477109	0	EAS
chr2	83492322	83265198	rs12987366	chr2_13	rs2163254,rs12477109	0	EAS
chr2	83494680	83267556	rs70949843	chr2_13	rs2163254,rs12477109	0	EAS
chr2	83499594	83272470	rs10539919	chr2_13	rs2163254,rs12477109	0	EAS
chr2	83503230	83276106	rs34314821	chr2_13	rs2163254,rs12477109	0	EAS
chr2	83516734	83289610	rs34457733	chr2_13	rs2163254,rs12477109	0	EAS
chr2	83516780	83289656	rs34567591	chr2_13	rs2163254,rs12477109	0	EAS
chr2	101275756	100659294	rs147232358	chr2_14	rs58921591,rs72981523	0	AFR
chr2	101275822	100659360	rs7580161	chr2_14	rs58921591,rs72981523	0	AFR
chr2	101276208	100659746	rs6715720	chr2_14	rs58921591,rs72981523	0	AFR
chr2	101276292	100659830	rs6715827	chr2_14	rs58921591,rs72981523	0	AFR
chr2	101276398	100659936	rs6730779	chr2_14	rs58921591,rs72981523	0	AFR
chr2	101276444	100659982	rs6730796	chr2_14	rs58921591,rs72981523	0	AFR
chr2	101276584	100660122	rs6733994	chr2_14	rs58921591,rs72981523	0	AFR
chr2	101276620	100660158	rs6731067	chr2_14	rs58921591,rs72981523	0	AFR
chr2	101276907	100660445	rs56966380	chr2_14	rs58921591,rs72981523	0	AFR
chr2	101277073	100660611	rs72979501	chr2_14	rs58921591,rs72981523	0	AFR
chr2	101277260	100660798	rs112788425	chr2_14	rs58921591,rs72981523	0	AFR
chr2	101277296	100660834	rs72981508	chr2_14	rs58921591,rs72981523	0	AFR
chr2	101277383	100660921	rs56725530	chr2_14	rs58921591,rs72981523	0	AFR
chr2	101277443	100660981	rs58921591	chr2_14	rs58921591,rs72981523	1	AFR;EUR
chr2	101277584	100661122	rs61553020	chr2_14	rs58921591,rs72981523	0	AFR
chr2	101277840	100661378	rs61169137	chr2_14	rs58921591,rs72981523	0	AFR
chr2	101277853	100661391	rs61258554	chr2_14	rs58921591,rs72981523	0	AFR
chr2	101277945	100661483	rs57602679	chr2_14	rs58921591,rs72981523	0	AFR
chr2	101278037	100661575	rs72981523	chr2_14	rs58921591,rs72981523	1	AFR
chr2	101278665	100662203	rs72981527	chr2_14	rs58921591,rs72981523	0	AFR
chr2	101278784	100662322	rs72981529	chr2_14	rs58921591,rs72981523	0	AFR
chr2	101279053	100662591	rs72981531	chr2_14	rs58921591,rs72981523	0	AFR
chr2	101279390	100662928	rs72981535	chr2_14	rs58921591,rs72981523	0	AFR
chr2	101280103	100663641	rs72981538	chr2_14	rs58921591,rs72981523	0	AFR
chr2	101280142	100663680	rs113892949	chr2_14	rs58921591,rs72981523	0	AFR
chr2	101280195	100663733	rs146707905	chr2_14	rs58921591,rs72981523	0	AFR
chr2	101283076	100666614	rs111710680	chr2_14	rs58921591,rs72981523	0	AFR
chr2	124580534	123822957	rs11405605	chr2_15	rs1214090,rs1119384	0	EUR
chr2	124605117	123847540	rs2203545	chr2_15	rs1214090,rs1119384	0	EUR
chr2	124639754	123882177	rs2048825	chr2_15	rs1214090,rs1119384	0	EUR
chr2	124642898	123885321	rs13383732	chr2_15	rs1214090,rs1119384	0	EUR
chr2	124661485	123903908	rs874519	chr2_15	rs1214090,rs1119384	0	EUR;AFR;EUR
chr2	124666542	123908965	rs1214074	chr2_15	rs1214090,rs1119384	0	EUR;AFR;EUR
chr2	124667299	123909722	rs1214073	chr2_15	rs1214090,rs1119384	0	EUR
chr2	124670658	123913081	rs1850167	chr2_15	rs1214090,rs1119384	0	EAS
chr2	124672237	123914660	rs1214067	chr2_15	rs1214090,rs1119384	0	AFR;EAS;EUR
chr2	124675291	123917714	rs10496621	chr2_15	rs1214090,rs1119384	0	EAS
chr2	124675557	123917980	rs6746184	chr2_15	rs1214090,rs1119384	0	EAS
chr2	124676369	123918792	rs871475	chr2_15	rs1214090,rs1119384	0	AFR;EAS;EUR
chr2	124678599	123921022	rs1214090	chr2_15	rs1214090,rs1119384	1	AFR;EAS;EUR
chr2	124678939	123921362	rs150405664	chr2_15	rs1214090,rs1119384	0	EAS;EUR
chr2	124678972	123921395	rs2704649	chr2_15	rs1214090,rs1119384	0	AFR;EAS;EUR
chr2	124679019	123921442	rs2674908	chr2_15	rs1214090,rs1119384	0	AFR;EAS;EUR
chr2	124679988	123922411	rs2704651	chr2_15	rs1214090,rs1119384	0	AFR;EAS;EUR
chr2	124680876	123923299	rs1119384	chr2_15	rs1214090,rs1119384	1	AFR;EAS;EUR
chr2	124681796	123924219	rs1588938	chr2_15	rs1214090,rs1119384	0	AFR;EAS;EUR
chr2	124682443	123924866	rs145980774	chr2_15	rs1214090,rs1119384	0	EAS
chr2	124683284	123925707	rs11434381	chr2_15	rs1214090,rs1119384	0	AFR;EAS;EUR
chr2	124683913	123926336	rs1214131	chr2_15	rs1214090,rs1119384	0	AFR;EAS;EUR
chr2	124684868	123927291	rs68192031	chr2_15	rs1214090,rs1119384	0	EAS
chr2	124686730	123929153	rs1214133	chr2_15	rs1214090,rs1119384	0	AFR;EAS;EUR
chr2	124687845	123930268	rs1214100	chr2_15	rs1214090,rs1119384	0	AFR;EAS;EUR
chr2	124688094	123930517	rs147916086	chr2_15	rs1214090,rs1119384	0	AFR;EAS;EUR
chr2	124688163	123930586	rs1214101	chr2_15	rs1214090,rs1119384	0	AFR;EAS;EUR
chr2	124688516	123930939	rs1214103	chr2_15	rs1214090,rs1119384	0	AFR;EAS;EUR
chr2	124689359	123931782	rs1214104	chr2_15	rs1214090,rs1119384	0	AFR;EAS;EUR
chr2	124689390	123931813	rs1214105	chr2_15	rs1214090,rs1119384	0	EAS;EUR
chr2	124689837	123932260	rs1214106	chr2_15	rs1214090,rs1119384	0	AFR;EAS;EUR
chr2	124689887	123932310	rs1214107	chr2_15	rs1214090,rs1119384	0	AFR;EAS;EUR
chr2	124689962	123932385	rs1214108	chr2_15	rs1214090,rs1119384	0	AFR;EAS;EUR
chr2	124690444	123932867	rs61121348	chr2_15	rs1214090,rs1119384	0	AFR;EAS;EUR
chr2	124691075	123933498	rs1214109	chr2_15	rs1214090,rs1119384	0	EAS;EUR
chr2	124691156	123933579	rs35141401	chr2_15	rs1214090,rs1119384	0	AFR;EAS;EUR
chr2	124691344	123933767	rs1214110	chr2_15	rs1214090,rs1119384	0	AFR;EAS;EUR
chr2	124691888	123934311	rs1214111	chr2_15	rs1214090,rs1119384	0	AFR;EAS;EUR
chr2	124692071	123934494	rs1214112	chr2_15	rs1214090,rs1119384	0	AFR;EAS;EUR
chr2	124693681	123936104	rs1400063	chr2_15	rs1214090,rs1119384	0	EAS;EUR
chr2	124694053	123936476	rs1214113	chr2_15	rs1214090,rs1119384	0	AFR;EAS;EUR
chr2	124694692	123937115	rs1214114	chr2_15	rs1214090,rs1119384	0	EAS;EUR
chr2	124695105	123937528	rs1214115	chr2_15	rs1214090,rs1119384	0	EAS
chr2	124695225	123937648	rs1214116	chr2_15	rs1214090,rs1119384	0	EAS;EUR
chr2	124697035	123939458	rs1214119	chr2_15	rs1214090,rs1119384	0	AFR;EAS;EUR
chr2	124697112	123939535	rs1214120	chr2_15	rs1214090,rs1119384	0	EAS;EUR
chr2	124697223	123939646	rs1214121	chr2_15	rs1214090,rs1119384	0	AFR;EAS;EUR
chr2	124698081	123940504	rs1214122	chr2_15	rs1214090,rs1119384	0	AFR;EAS;EUR
chr2	124698518	123940941	rs1214123	chr2_15	rs1214090,rs1119384	0	EAS;EUR
chr2	124698655	123941078	rs1214124	chr2_15	rs1214090,rs1119384	0	EAS;EUR
chr2	124699232	123941655	rs1214125	chr2_15	rs1214090,rs1119384	0	EAS;EUR
chr2	124699689	123942112	rs1214126	chr2_15	rs1214090,rs1119384	0	EAS;EUR
chr2	124699779	123942202	rs67690655	chr2_15	rs1214090,rs1119384	0	EAS
chr2	124700213	123942636	rs1214127	chr2_15	rs1214090,rs1119384	0	AFR;EAS;EUR
chr2	124700434	123942857	rs1214128	chr2_15	rs1214090,rs1119384	0	EAS;EUR
chr2	124700704	123943127	rs6727742	chr2_15	rs1214090,rs1119384	0	EAS
chr2	124700928	123943351	rs1214129	chr2_15	rs1214090,rs1119384	0	EAS;EUR
chr2	124701077	123943500	rs1516073	chr2_15	rs1214090,rs1119384	0	EAS
chr2	124701537	123943960	rs1214130	chr2_15	rs1214090,rs1119384	0	AFR;EAS;EUR
chr2	124701856	123944279	rs6760710	chr2_15	rs1214090,rs1119384	0	EAS
chr2	124702887	123945310	rs2176210	chr2_15	rs1214090,rs1119384	0	EAS;EUR
chr2	124703755	123946178	rs34677617	chr2_15	rs1214090,rs1119384	0	EAS;EUR
chr2	124704108	123946531	rs1214092	chr2_15	rs1214090,rs1119384	0	AFR;EAS;EUR
chr2	124704872	123947295	rs1214093	chr2_15	rs1214090,rs1119384	0	AFR;EAS;EUR
chr2	124705347	123947770	rs1214094	chr2_15	rs1214090,rs1119384	0	AFR;EAS;EUR
chr2	124705474	123947897	rs1214095	chr2_15	rs1214090,rs1119384	0	EAS;EUR
chr2	124705511	123947934	rs1214096	chr2_15	rs1214090,rs1119384	0	AFR;EAS;EUR
chr2	124706091	123948514	rs7577143	chr2_15	rs1214090,rs1119384	0	EAS
chr2	124706397	123948820	rs1214098	chr2_15	rs1214090,rs1119384	0	AFR;EAS;EUR
chr2	124708672	123951095	rs1214088	chr2_15	rs1214090,rs1119384	0	EAS;EUR
chr2	124708770	123951193	rs1214087	chr2_15	rs1214090,rs1119384	0	EAS;EUR
chr2	124709159	123951582	rs1214086	chr2_15	rs1214090,rs1119384	0	EAS;EUR
chr2	124709250	123951673	rs1214085	chr2_15	rs1214090,rs1119384	0	AFR;EAS;EUR
chr2	124710434	123952857	rs1214083	chr2_15	rs1214090,rs1119384	0	EAS;EUR
chr2	124710795	123953218	rs1214081	chr2_15	rs1214090,rs1119384	0	EAS;EUR
chr2	124711669	123954092	rs1214078	chr2_15	rs1214090,rs1119384	0	AFR;EAS;EUR
chr2	124712855	123955278	rs7557077	chr2_15	rs1214090,rs1119384	0	EAS;EUR
chr2	124713473	123955896	rs367751243	chr2_15	rs1214090,rs1119384	0	EAS
chr2	124713497	123955920	rs374834434	chr2_15	rs1214090,rs1119384	0	EAS
chr2	124713545	123955968	rs369656703	chr2_15	rs1214090,rs1119384	0	EAS
chr2	124713788	123956211	rs1599954	chr2_15	rs1214090,rs1119384	0	AFR;EAS;EUR
chr2	124714417	123956840	rs7563776	chr2_15	rs1214090,rs1119384	0	EUR
chr2	124715788	123958211	rs17010669	chr2_15	rs1214090,rs1119384	0	EAS
chr2	124716427	123958850	rs13014220	chr2_15	rs1214090,rs1119384	0	EAS
chr2	124717158	123959581	rs1214062	chr2_15	rs1214090,rs1119384	0	AFR;EAS;EUR
chr2	124717765	123960188	rs60249630	chr2_15	rs1214090,rs1119384	0	EAS
chr2	124718476	123960899	rs66568849	chr2_15	rs1214090,rs1119384	0	EAS
chr2	124719059	123961482	rs1214059	chr2_15	rs1214090,rs1119384	0	AFR;EAS;EUR
chr2	124719189	123961612	rs140435710	chr2_15	rs1214090,rs1119384	0	AFR;EAS;EUR
chr2	124722599	123965022	rs1234547	chr2_15	rs1214090,rs1119384	0	AFR;EAS;EUR
chr2	124723573	123965996	rs1214047	chr2_15	rs1214090,rs1119384	0	EAS;EUR
chr2	124723714	123966137	rs1214048	chr2_15	rs1214090,rs1119384	0	AFR;EAS;EUR
chr2	124724577	123967000	rs1214051	chr2_15	rs1214090,rs1119384	0	EAS;EUR
chr2	124725946	123968369	rs148645102	chr2_15	rs1214090,rs1119384	0	EAS;EUR
chr2	124726225	123968648	rs1214052	chr2_15	rs1214090,rs1119384	0	EAS;EUR
chr2	124726565	123968988	rs1214053	chr2_15	rs1214090,rs1119384	0	AFR;EAS;EUR
chr2	124726813	123969236	rs11388640	chr2_15	rs1214090,rs1119384	0	EAS;EUR
chr2	124727264	123969687	rs1214054	chr2_15	rs1214090,rs1119384	0	EAS;EUR
chr2	124727570	123969993	rs1214055	chr2_15	rs1214090,rs1119384	0	EAS;EUR
chr2	124728244	123970667	rs3109028	chr2_15	rs1214090,rs1119384	0	EAS;EUR
chr2	124728263	123970686	rs13011798	chr2_15	rs1214090,rs1119384	0	EAS
chr2	124729373	123971796	rs56990699	chr2_15	rs1214090,rs1119384	0	EAS
chr2	124729478	123971901	rs2674921	chr2_15	rs1214090,rs1119384	0	AFR;EAS;EUR
chr2	124729605	123972028	rs2674922	chr2_15	rs1214090,rs1119384	0	AFR;EAS;EUR
chr2	124730172	123972595	rs960009	chr2_15	rs1214090,rs1119384	0	AFR;EAS;EUR
chr2	124730999	123973422	rs6756614	chr2_15	rs1214090,rs1119384	0	EAS
chr2	129348281	128590707	rs188470518	chr2_16	rs186616630,rs116749082	0	AFR
chr2	129371047	128613473	rs114869854	chr2_16	rs186616630,rs116749082	0	AFR
chr2	129373739	128616165	rs186864896	chr2_16	rs186616630,rs116749082	0	AFR
chr2	129377764	128620190	rs60641996	chr2_16	rs186616630,rs116749082	0	AFR
chr2	129378516	128620942	rs116588819	chr2_16	rs186616630,rs116749082	0	AFR
chr2	129380041	128622467	rs182192869	chr2_16	rs186616630,rs116749082	0	AFR
chr2	129380049	128622475	rs187231500	chr2_16	rs186616630,rs116749082	0	AFR
chr2	129380059	128622485	rs190649982	chr2_16	rs186616630,rs116749082	0	AFR
chr2	129381343	128623769	rs183922896	chr2_16	rs186616630,rs116749082	0	AFR
chr2	129384939	128627365	rs114879027	chr2_16	rs186616630,rs116749082	0	AFR
chr2	129385155	128627581	rs186616630	chr2_16	rs186616630,rs116749082	1	AFR
chr2	129386022	128628448	rs114963295	chr2_16	rs186616630,rs116749082	0	AFR
chr2	129388993	128631419	rs116749082	chr2_16	rs186616630,rs116749082	1	AFR
chr2	129402787	128645213	rs190523759	chr2_16	rs186616630,rs116749082	0	AFR
chr2	129408560	128650986	rs145074409	chr2_16	rs186616630,rs116749082	0	AFR
chr2	129411830	128654256	rs193124284	chr2_16	rs186616630,rs116749082	0	AFR
chr2	129412343	128654769	rs184313873	chr2_16	rs186616630,rs116749082	0	AFR
chr2	129412421	128654847	rs375753656	chr2_16	rs186616630,rs116749082	0	AFR
chr2	129419363	128661789	rs12105469	chr2_16	rs186616630,rs116749082	0	AFR
chr2	168640754	167784244	rs7562394	chr2_17	rs59901332,rs10196543	0	EAS
chr2	168645202	167788692	rs1867825	chr2_17	rs59901332,rs10196543	0	EAS
chr2	168645284	167788774	rs75697425	chr2_17	rs59901332,rs10196543	0	EUR
chr2	168646130	167789620	rs71848485	chr2_17	rs59901332,rs10196543	0	EAS
chr2	168647181	167790671	rs60032596	chr2_17	rs59901332,rs10196543	0	AFR;EAS
chr2	168647609	167791099	rs80008990	chr2_17	rs59901332,rs10196543	0	AFR
chr2	168648231	167791721	rs11695825	chr2_17	rs59901332,rs10196543	0	EAS
chr2	168651675	167795165	rs6705218	chr2_17	rs59901332,rs10196543	0	AFR
chr2	168652203	167795693	rs1374279	chr2_17	rs59901332,rs10196543	0	EUR
chr2	168652708	167796198	rs59901332	chr2_17	rs59901332,rs10196543	1	AFR
chr2	168653321	167796811	rs75904417	chr2_17	rs59901332,rs10196543	0	EUR
chr2	168653425	167796915	rs1446502	chr2_17	rs59901332,rs10196543	0	AFR;EAS
chr2	168653555	167797045	rs10930284	chr2_17	rs59901332,rs10196543	0	AFR;EAS
chr2	168654102	167797592	rs10189936	chr2_17	rs59901332,rs10196543	0	AFR;EAS
chr2	168654130	167797620	rs10202340	chr2_17	rs59901332,rs10196543	0	EAS
chr2	168654132	167797622	rs10190098	chr2_17	rs59901332,rs10196543	0	EAS
chr2	168654146	167797636	rs7565118	chr2_17	rs59901332,rs10196543	0	EAS
chr2	168654417	167797907	rs13409891	chr2_17	rs59901332,rs10196543	0	AFR;EAS
chr2	168654450	167797940	rs10166416	chr2_17	rs59901332,rs10196543	0	EAS;EUR
chr2	168654667	167798157	rs7594948	chr2_17	rs59901332,rs10196543	0	EAS;EUR
chr2	168654738	167798228	rs7595155	chr2_17	rs59901332,rs10196543	0	AFR;EAS;EUR
chr2	168654856	167798346	rs7609155	chr2_17	rs59901332,rs10196543	0	EAS;EUR
chr2	168654999	167798489	rs7609396	chr2_17	rs59901332,rs10196543	0	EAS
chr2	168655422	167798912	rs16854217	chr2_17	rs59901332,rs10196543	0	EAS;EUR
chr2	168655592	167799082	rs10196226	chr2_17	rs59901332,rs10196543	0	EAS;EUR
chr2	168655743	167799233	rs11903408	chr2_17	rs59901332,rs10196543	0	AFR
chr2	168655814	167799304	rs10208688	chr2_17	rs59901332,rs10196543	0	EAS;EUR
chr2	168655848	167799338	rs10196281	chr2_17	rs59901332,rs10196543	0	EAS;EUR
chr2	168655935	167799425	rs10196543	chr2_17	rs59901332,rs10196543	1	AFR;EAS;EUR
chr2	168656460	167799950	rs72119956	chr2_17	rs59901332,rs10196543	0	AFR;EAS;EUR
chr2	168656714	167800204	rs67700417	chr2_17	rs59901332,rs10196543	0	AFR;EAS
chr2	168657058	167800548	rs10199894	chr2_17	rs59901332,rs10196543	0	EAS;EUR
chr2	168657266	167800756	rs7603248	chr2_17	rs59901332,rs10196543	0	EAS;EUR
chr2	168657407	167800897	rs7576736	chr2_17	rs59901332,rs10196543	0	EAS;EUR
chr2	168657884	167801374	rs10930285	chr2_17	rs59901332,rs10196543	0	AFR;EAS;EUR
chr2	168657886	167801376	rs10930286	chr2_17	rs59901332,rs10196543	0	EAS;EUR
chr2	168658475	167801965	rs4667975	chr2_17	rs59901332,rs10196543	0	EAS;EUR
chr2	168658670	167802160	rs4667976	chr2_17	rs59901332,rs10196543	0	EAS;EUR
chr2	168658782	167802272	rs13427223	chr2_17	rs59901332,rs10196543	0	EAS;EUR
chr2	168658868	167802358	rs78786223	chr2_17	rs59901332,rs10196543	0	EUR
chr2	168659428	167802918	rs10715952	chr2_17	rs59901332,rs10196543	0	EAS;EUR
chr2	168660701	167804191	rs13415184	chr2_17	rs59901332,rs10196543	0	EAS
chr2	168660910	167804400	rs148122763	chr2_17	rs59901332,rs10196543	0	EUR
chr2	168660947	167804437	rs9679531	chr2_17	rs59901332,rs10196543	0	EAS
chr2	168661021	167804511	rs9287888	chr2_17	rs59901332,rs10196543	0	EAS
chr2	168662088	167805578	rs147541473	chr2_17	rs59901332,rs10196543	0	EAS;EUR
chr2	168662512	167806002	rs188845698	chr2_17	rs59901332,rs10196543	0	EAS;EUR
chr2	168662908	167806398	rs4667979	chr2_17	rs59901332,rs10196543	0	EAS
chr2	168662995	167806485	rs4667980	chr2_17	rs59901332,rs10196543	0	EAS;EUR
chr2	168663014	167806504	rs4667981	chr2_17	rs59901332,rs10196543	0	EAS
chr2	168663106	167806596	rs146525503	chr2_17	rs59901332,rs10196543	0	EUR
chr2	168665908	167809398	rs184565990	chr2_17	rs59901332,rs10196543	0	EUR
chr2	168668183	167811673	rs58857993	chr2_17	rs59901332,rs10196543	0	EAS
chr2	168669384	167812874	rs76414298	chr2_17	rs59901332,rs10196543	0	EUR
chr2	168669514	167813004	rs11372260	chr2_17	rs59901332,rs10196543	0	EAS
chr2	168670476	167813966	rs56994097	chr2_17	rs59901332,rs10196543	0	EUR
chr2	199498173	198633449	rs10497818	chr2_18	rs13426764,rs11694806	0	EAS;EUR
chr2	199498921	198634197	rs1809194	chr2_18	rs13426764,rs11694806	0	EAS;EUR
chr2	199499356	198634632	rs11687833	chr2_18	rs13426764,rs11694806	0	EAS;EUR
chr2	199499443	198634719	rs9941524	chr2_18	rs13426764,rs11694806	0	EAS;EUR
chr2	199500000	198635276	rs897399	chr2_18	rs13426764,rs11694806	0	EAS;EUR
chr2	199504423	198639699	rs7587930	chr2_18	rs13426764,rs11694806	0	EAS;EUR
chr2	199504765	198640041	rs992005	chr2_18	rs13426764,rs11694806	0	EAS;EUR
chr2	199506556	198641832	rs7569314	chr2_18	rs13426764,rs11694806	0	EAS;EUR
chr2	199507941	198643217	rs7602269	chr2_18	rs13426764,rs11694806	0	EAS;EUR
chr2	199509528	198644804	rs376306779	chr2_18	rs13426764,rs11694806	0	EAS;EUR
chr2	199513476	198648752	rs141517122	chr2_18	rs13426764,rs11694806	0	EAS;EUR
chr2	199513555	198648831	rs7601848	chr2_18	rs13426764,rs11694806	0	EAS;EUR
chr2	199514275	198649551	rs12693854	chr2_18	rs13426764,rs11694806	0	EAS;EUR
chr2	199514437	198649713	rs35547327	chr2_18	rs13426764,rs11694806	0	EAS;EUR
chr2	199514757	198650033	rs10931822	chr2_18	rs13426764,rs11694806	0	EAS;EUR
chr2	199516059	198651335	rs1455344	chr2_18	rs13426764,rs11694806	0	EAS;EUR
chr2	199518159	198653435	rs13393754	chr2_18	rs13426764,rs11694806	0	EAS;EUR
chr2	199519691	198654967	rs1455343	chr2_18	rs13426764,rs11694806	0	EAS
chr2	199520404	198655680	rs7562655	chr2_18	rs13426764,rs11694806	0	EAS;EUR
chr2	199520605	198655881	rs7601948	chr2_18	rs13426764,rs11694806	0	EAS;EUR
chr2	199521868	198657144	rs1455342	chr2_18	rs13426764,rs11694806	0	EAS;EUR
chr2	199522842	198658118	rs7592562	chr2_18	rs13426764,rs11694806	0	EAS;EUR
chr2	199522858	198658134	rs9973442	chr2_18	rs13426764,rs11694806	0	EAS;EUR
chr2	199523122	198658398	rs17229285	chr2_18	rs13426764,rs11694806	0	EUR
chr2	199527400	198662676	rs11381395	chr2_18	rs13426764,rs11694806	0	EAS;EUR
chr2	199528836	198664112	rs35582389	chr2_18	rs13426764,rs11694806	0	EAS;EUR
chr2	199529606	198664882	rs17229432	chr2_18	rs13426764,rs11694806	0	EAS;EUR
chr2	199530324	198665600	rs7566330	chr2_18	rs13426764,rs11694806	0	EAS;EUR
chr2	199531599	198666875	rs79154702	chr2_18	rs13426764,rs11694806	0	EAS;EUR
chr2	199532320	198667596	rs35645546	chr2_18	rs13426764,rs11694806	0	EAS;EUR
chr2	199533641	198668917	rs2343636	chr2_18	rs13426764,rs11694806	0	AFR;EAS;EUR
chr2	199533654	198668930	rs4266009	chr2_18	rs13426764,rs11694806	0	AFR;EAS;EUR
chr2	199534174	198669450	rs34479423	chr2_18	rs13426764,rs11694806	0	AFR;EAS;EUR
chr2	199534281	198669557	rs12997439	chr2_18	rs13426764,rs11694806	0	AFR;EAS;EUR
chr2	199534418	198669694	rs13024258	chr2_18	rs13426764,rs11694806	0	EAS;EUR
chr2	199534694	198669970	rs76588393	chr2_18	rs13426764,rs11694806	0	AFR;EAS;EUR
chr2	199534950	198670226	rs76315705	chr2_18	rs13426764,rs11694806	0	AFR;EAS;EUR
chr2	199535023	198670299	rs75531254	chr2_18	rs13426764,rs11694806	0	AFR;EAS;EUR
chr2	199535275	198670551	rs10196804	chr2_18	rs13426764,rs11694806	0	AFR;EAS;EUR
chr2	199536340	198671616	rs7568972	chr2_18	rs13426764,rs11694806	0	AFR;EAS;EUR
chr2	199536602	198671878	rs11691766	chr2_18	rs13426764,rs11694806	0	AFR;EAS;EUR
chr2	199537086	198672362	rs10203265	chr2_18	rs13426764,rs11694806	0	AFR;EAS;EUR
chr2	199537789	198673065	rs34622044	chr2_18	rs13426764,rs11694806	0	AFR;EAS;EUR
chr2	199537928	198673204	rs12693855	chr2_18	rs13426764,rs11694806	0	AFR;EAS;EUR
chr2	199537945	198673221	rs201992454	chr2_18	rs13426764,rs11694806	0	AFR;EAS;EUR
chr2	199537981	198673257	rs12693856	chr2_18	rs13426764,rs11694806	0	AFR;EAS;EUR
chr2	199538613	198673889	rs10174785	chr2_18	rs13426764,rs11694806	0	AFR;EAS;EUR
chr2	199538710	198673986	rs13031573	chr2_18	rs13426764,rs11694806	0	AFR;EAS;EUR
chr2	199539085	198674361	rs10210021	chr2_18	rs13426764,rs11694806	0	EAS;EUR
chr2	199539101	198674377	rs10175313	chr2_18	rs13426764,rs11694806	0	AFR;EAS;EUR
chr2	199539202	198674478	rs35637543	chr2_18	rs13426764,rs11694806	0	AFR;EAS;EUR
chr2	199539455	198674731	rs10186646	chr2_18	rs13426764,rs11694806	0	AFR;EAS;EUR
chr2	199540532	198675808	rs1350014	chr2_18	rs13426764,rs11694806	0	AFR;EAS;EUR
chr2	199540717	198675993	rs1350013	chr2_18	rs13426764,rs11694806	0	AFR;EAS;EUR
chr2	199541015	198676291	rs6711590	chr2_18	rs13426764,rs11694806	0	AFR;EAS;EUR
chr2	199541175	198676451	rs6725176	chr2_18	rs13426764,rs11694806	0	AFR;EAS;EUR
chr2	199541684	198676960	rs13396912	chr2_18	rs13426764,rs11694806	0	EAS;EUR
chr2	199541883	198677159	rs10201987	chr2_18	rs13426764,rs11694806	0	AFR;EAS;EUR
chr2	199542312	198677588	rs12693857	chr2_18	rs13426764,rs11694806	0	AFR;EAS;EUR
chr2	199542357	198677633	rs13385754	chr2_18	rs13426764,rs11694806	0	AFR;EAS;EUR
chr2	199542428	198677704	rs13423255	chr2_18	rs13426764,rs11694806	0	AFR;EAS;EUR
chr2	199542506	198677782	rs12693858	chr2_18	rs13426764,rs11694806	0	AFR;EAS;EUR
chr2	199542619	198677895	rs34309101	chr2_18	rs13426764,rs11694806	0	EAS;EUR
chr2	199542718	198677994	rs1455335	chr2_18	rs13426764,rs11694806	0	AFR;EAS;EUR
chr2	199542837	198678113	rs1455334	chr2_18	rs13426764,rs11694806	0	AFR;EAS;EUR
chr2	199543059	198678335	rs12693859	chr2_18	rs13426764,rs11694806	0	EAS;EUR
chr2	199543380	198678656	rs13426764	chr2_18	rs13426764,rs11694806	1	AFR;EAS;EUR
chr2	199544091	198679367	rs11694806	chr2_18	rs13426764,rs11694806	1	AFR;EAS;EUR
chr2	199544556	198679832	rs2343637	chr2_18	rs13426764,rs11694806	0	EAS;EUR
chr2	199545018	198680294	rs12693860	chr2_18	rs13426764,rs11694806	0	AFR;EAS;EUR
chr2	199545315	198680591	rs6741429	chr2_18	rs13426764,rs11694806	0	AFR;EAS;EUR
chr2	199545371	198680647	rs6741542	chr2_18	rs13426764,rs11694806	0	AFR;EAS;EUR
chr2	199549309	198684585	rs2007176	chr2_18	rs13426764,rs11694806	0	EAS;EUR
chr2	199551214	198686490	rs7420621	chr2_18	rs13426764,rs11694806	0	EAS;EUR
chr2	199552193	198687469	rs114358333	chr2_18	rs13426764,rs11694806	0	EUR
chr2	199552561	198687837	rs146710164	chr2_18	rs13426764,rs11694806	0	EAS;EUR
chr2	199553432	198688708	rs140269795	chr2_18	rs13426764,rs11694806	0	EAS;EUR
chr2	199553600	198688876	rs114125694	chr2_18	rs13426764,rs11694806	0	EAS;EUR
chr2	199553892	198689168	rs34349601	chr2_18	rs13426764,rs11694806	0	EAS;EUR
chr2	199554281	198689557	rs7578102	chr2_18	rs13426764,rs11694806	0	EAS;EUR
chr2	199555016	198690292	rs79993383	chr2_18	rs13426764,rs11694806	0	EAS;EUR
chr2	199555019	198690295	rs7581489	chr2_18	rs13426764,rs11694806	0	EAS;EUR
chr2	199555172	198690448	rs74860168	chr2_18	rs13426764,rs11694806	0	EAS;EUR
chr2	199557725	198693001	rs17826222	chr2_18	rs13426764,rs11694806	0	EAS;EUR
chr2	199557971	198693247	rs13410413	chr2_18	rs13426764,rs11694806	0	EAS;EUR
chr2	199558179	198693455	rs17826270	chr2_18	rs13426764,rs11694806	0	EAS;EUR
chr2	199558875	198694151	rs66729503	chr2_18	rs13426764,rs11694806	0	EAS;EUR
chr2	199558921	198694197	rs17229594	chr2_18	rs13426764,rs11694806	0	EAS;EUR
chr2	199559177	198694453	rs10931828	chr2_18	rs13426764,rs11694806	0	EUR
chr2	199561326	198696602	rs17229728	chr2_18	rs13426764,rs11694806	0	EAS;EUR
chr2	199561360	198696636	rs17229763	chr2_18	rs13426764,rs11694806	0	EAS;EUR
chr2	199561760	198697036	rs17826492	chr2_18	rs13426764,rs11694806	0	EAS;EUR
chr2	199562944	198698220	rs6757686	chr2_18	rs13426764,rs11694806	0	EAS;EUR
chr2	199562966	198698242	rs10202115	chr2_18	rs13426764,rs11694806	0	EAS;EUR
chr2	199567687	198702963	rs6434978	chr2_18	rs13426764,rs11694806	0	EAS
chr2	199567722	198702998	rs10552825	chr2_18	rs13426764,rs11694806	0	EAS
chr2	199568365	198703641	rs138728633	chr2_18	rs13426764,rs11694806	0	EAS
chr2	199569317	198704593	rs67434847	chr2_18	rs13426764,rs11694806	0	EAS
chr2	199570718	198705994	rs6434979	chr2_18	rs13426764,rs11694806	0	EAS
chr2	199571750	198707026	rs1356485	chr2_18	rs13426764,rs11694806	0	EAS
chr2	199572092	198707368	rs6757941	chr2_18	rs13426764,rs11694806	0	EAS
chr2	199572550	198707826	rs6434980	chr2_18	rs13426764,rs11694806	0	EAS
chr2	199572781	198708057	rs1356493	chr2_18	rs13426764,rs11694806	0	EAS
chr2	199581514	198716790	rs1878668	chr2_18	rs13426764,rs11694806	0	EAS
chr2	199584179	198719455	rs34119476	chr2_18	rs13426764,rs11694806	0	EAS
chr2	199588259	198723535	rs11271458	chr2_18	rs13426764,rs11694806	0	EAS
chr2	199588261	198723537	rs199804030	chr2_18	rs13426764,rs11694806	0	EAS
chr2	214121034	213256310	rs147561135	chr2_19	rs73988544,rs6745832	0	EAS
chr2	214122748	213258024	rs10497998	chr2_19	rs73988544,rs6745832	0	EAS
chr2	214123122	213258398	rs16850062	chr2_19	rs73988544,rs6745832	0	EAS
chr2	214123612	213258888	rs10166603	chr2_19	rs73988544,rs6745832	0	EAS
chr2	214123709	213258985	rs202138337	chr2_19	rs73988544,rs6745832	0	EAS
chr2	214125463	213260739	rs13402325	chr2_19	rs73988544,rs6745832	0	EAS
chr2	214125464	213260740	rs13414222	chr2_19	rs73988544,rs6745832	0	EAS
chr2	214125847	213261123	rs75802738	chr2_19	rs73988544,rs6745832	0	EAS
chr2	214126159	213261435	rs75448404	chr2_19	rs73988544,rs6745832	0	EAS
chr2	214126197	213261473	rs10084389	chr2_19	rs73988544,rs6745832	0	EAS
chr2	214126494	213261770	rs79064749	chr2_19	rs73988544,rs6745832	0	EAS
chr2	214126788	213262064	rs1219967	chr2_19	rs73988544,rs6745832	0	EAS
chr2	214127862	213263138	rs746954	chr2_19	rs73988544,rs6745832	0	EAS
chr2	214128433	213263709	rs115029260	chr2_19	rs73988544,rs6745832	0	EAS
chr2	214129373	213264649	rs75458685	chr2_19	rs73988544,rs6745832	0	EAS
chr2	214129709	213264985	rs79663908	chr2_19	rs73988544,rs6745832	0	EAS
chr2	214129872	213265148	rs146587704	chr2_19	rs73988544,rs6745832	0	EAS
chr2	214130018	213265294	rs183385599	chr2_19	rs73988544,rs6745832	0	EAS
chr2	214130611	213265887	rs2634481	chr2_19	rs73988544,rs6745832	0	EAS
chr2	214130618	213265894	rs2634480	chr2_19	rs73988544,rs6745832	0	EAS
chr2	214131856	213267132	rs111371055	chr2_19	rs73988544,rs6745832	0	EAS
chr2	214132100	213267376	rs189599929	chr2_19	rs73988544,rs6745832	0	EAS
chr2	214132478	213267754	rs201024094	chr2_19	rs73988544,rs6745832	0	EAS
chr2	214132484	213267760	rs373966669	chr2_19	rs73988544,rs6745832	0	EAS
chr2	214134897	213270173	rs112714333	chr2_19	rs73988544,rs6745832	0	EAS
chr2	214135456	213270732	rs76007704	chr2_19	rs73988544,rs6745832	0	EAS
chr2	214135615	213270891	rs1219977	chr2_19	rs73988544,rs6745832	0	EAS
chr2	214136135	213271411	rs1219976	chr2_19	rs73988544,rs6745832	0	EAS
chr2	214137161	213272437	rs149787228	chr2_19	rs73988544,rs6745832	0	EAS
chr2	214150176	213285452	rs17364024	chr2_19	rs73988544,rs6745832	0	EAS;EUR
chr2	214156261	213291537	rs115093595	chr2_19	rs73988544,rs6745832	0	EAS;EUR
chr2	214157345	213292621	rs187077312	chr2_19	rs73988544,rs6745832	0	AFR
chr2	214157435	213292711	rs77562150	chr2_19	rs73988544,rs6745832	0	AFR
chr2	214160817	213296093	rs61752198	chr2_19	rs73988544,rs6745832	0	EAS;EUR
chr2	214161390	213296666	rs115677452	chr2_19	rs73988544,rs6745832	0	EAS;EUR
chr2	214169642	213304918	rs13422754	chr2_19	rs73988544,rs6745832	0	AFR
chr2	214175439	213310715	rs7566391	chr2_19	rs73988544,rs6745832	0	AFR
chr2	214179695	213314971	rs199857848	chr2_19	rs73988544,rs6745832	0	EAS;EUR
chr2	214180390	213315666	rs1601955	chr2_19	rs73988544,rs6745832	0	EAS;EUR
chr2	214184682	213319958	rs115824678	chr2_19	rs73988544,rs6745832	0	EAS;EUR
chr2	214184878	213320154	rs116559663	chr2_19	rs73988544,rs6745832	0	EAS;EUR
chr2	214185479	213320755	rs189259982	chr2_19	rs73988544,rs6745832	0	EAS;EUR
chr2	214189999	213325275	rs186256906	chr2_19	rs73988544,rs6745832	0	EAS;EUR
chr2	214191987	213327263	rs78733093	chr2_19	rs73988544,rs6745832	0	EAS;EUR
chr2	214192198	213327474	rs59138793	chr2_19	rs73988544,rs6745832	0	AFR
chr2	214192523	213327799	rs60144296	chr2_19	rs73988544,rs6745832	0	AFR
chr2	214192974	213328250	rs7579697	chr2_19	rs73988544,rs6745832	0	AFR
chr2	214194637	213329913	rs115680536	chr2_19	rs73988544,rs6745832	0	EAS;EUR
chr2	214194823	213330099	rs147474479	chr2_19	rs73988544,rs6745832	0	EAS;EUR
chr2	214195562	213330838	rs114966620	chr2_19	rs73988544,rs6745832	0	AFR
chr2	214197218	213332494	rs78858391	chr2_19	rs73988544,rs6745832	0	EAS;EUR
chr2	214198574	213333850	rs7572425	chr2_19	rs73988544,rs6745832	0	AFR
chr2	214198858	213334134	rs151217789	chr2_19	rs73988544,rs6745832	0	EAS;EUR
chr2	214200226	213335502	rs73987979	chr2_19	rs73988544,rs6745832	0	AFR
chr2	214200787	213336063	rs79500785	chr2_19	rs73988544,rs6745832	0	EAS;EUR
chr2	214200793	213336069	rs73987980	chr2_19	rs73988544,rs6745832	0	AFR
chr2	214201170	213336446	rs6740801	chr2_19	rs73988544,rs6745832	0	AFR
chr2	214201338	213336614	rs74365153	chr2_19	rs73988544,rs6745832	0	EAS;EUR
chr2	214201376	213336652	rs78292578	chr2_19	rs73988544,rs6745832	0	EAS;EUR
chr2	214201671	213336947	rs75446509	chr2_19	rs73988544,rs6745832	0	EAS;EUR
chr2	214202264	213337540	rs113586302	chr2_19	rs73988544,rs6745832	0	EAS;EUR
chr2	214202327	213337603	rs111640014	chr2_19	rs73988544,rs6745832	0	EAS;EUR
chr2	214202333	213337609	rs113553771	chr2_19	rs73988544,rs6745832	0	EAS;EUR
chr2	214202543	213337819	rs79891292	chr2_19	rs73988544,rs6745832	0	EAS;EUR
chr2	214202776	213338052	rs112409377	chr2_19	rs73988544,rs6745832	0	EAS;EUR
chr2	214203865	213339141	rs6710533	chr2_19	rs73988544,rs6745832	0	EAS;EUR
chr2	214203895	213339171	rs79066770	chr2_19	rs73988544,rs6745832	0	EAS;EUR
chr2	214203913	213339189	rs73987993	chr2_19	rs73988544,rs6745832	0	EAS;EUR
chr2	214204026	213339302	rs115370996	chr2_19	rs73988544,rs6745832	0	EAS;EUR
chr2	214204512	213339788	rs148057156	chr2_19	rs73988544,rs6745832	0	AFR
chr2	214204609	213339885	rs76401622	chr2_19	rs73988544,rs6745832	0	EAS;EUR
chr2	214204658	213339934	rs73987994	chr2_19	rs73988544,rs6745832	0	AFR
chr2	214205335	213340611	rs112862682	chr2_19	rs73988544,rs6745832	0	EAS;EUR
chr2	214206517	213341793	rs77640577	chr2_19	rs73988544,rs6745832	0	EAS;EUR
chr2	214206855	213342131	rs114518548	chr2_19	rs73988544,rs6745832	0	EAS;EUR
chr2	214206881	213342157	rs76214041	chr2_19	rs73988544,rs6745832	0	EAS;EUR
chr2	214206882	213342158	rs75850618	chr2_19	rs73988544,rs6745832	0	EAS;EUR
chr2	214207004	213342280	rs114126262	chr2_19	rs73988544,rs6745832	0	EAS;EUR
chr2	214207009	213342285	rs199963967	chr2_19	rs73988544,rs6745832	0	EAS;EUR
chr2	214207161	213342437	rs76071405	chr2_19	rs73988544,rs6745832	0	EAS;EUR
chr2	214208302	213343578	rs73987996	chr2_19	rs73988544,rs6745832	0	EAS;EUR
chr2	214208522	213343798	rs77988078	chr2_19	rs73988544,rs6745832	0	EAS;EUR
chr2	214209349	213344625	rs145676230	chr2_19	rs73988544,rs6745832	0	EUR
chr2	214209517	213344793	rs189869236	chr2_19	rs73988544,rs6745832	0	EAS;EUR
chr2	214209554	213344830	rs138230515	chr2_19	rs73988544,rs6745832	0	EAS;EUR
chr2	214210537	213345813	rs138981596	chr2_19	rs73988544,rs6745832	0	EUR
chr2	214210662	213345938	rs149428666	chr2_19	rs73988544,rs6745832	0	EAS;EUR
chr2	214211429	213346705	rs6760156	chr2_19	rs73988544,rs6745832	0	AFR
chr2	214211498	213346774	rs369760820	chr2_19	rs73988544,rs6745832	0	EAS;EUR
chr2	214211516	213346792	rs374168660	chr2_19	rs73988544,rs6745832	0	EAS;EUR
chr2	214212320	213347596	rs144248553	chr2_19	rs73988544,rs6745832	0	EAS;EUR
chr2	214212488	213347764	rs147349493	chr2_19	rs73988544,rs6745832	0	EAS;EUR
chr2	214212541	213347817	rs139203639	chr2_19	rs73988544,rs6745832	0	EAS;EUR
chr2	214212575	213347851	rs149944872	chr2_19	rs73988544,rs6745832	0	EAS;EUR
chr2	214212836	213348112	rs143360944	chr2_19	rs73988544,rs6745832	0	EAS;EUR
chr2	214213169	213348445	rs148289037	chr2_19	rs73988544,rs6745832	0	EUR
chr2	214213363	213348639	rs140606081	chr2_19	rs73988544,rs6745832	0	EAS
chr2	214214204	213349480	rs75247558	chr2_19	rs73988544,rs6745832	0	EAS;EUR
chr2	214214503	213349779	rs74853281	chr2_19	rs73988544,rs6745832	0	EAS;EUR
chr2	214214892	213350168	rs112339310	chr2_19	rs73988544,rs6745832	0	EAS;EUR
chr2	214215704	213350980	rs373415521	chr2_19	rs73988544,rs6745832	0	EAS;EUR
chr2	214216957	213352233	rs75345566	chr2_19	rs73988544,rs6745832	0	EAS;EUR
chr2	214218107	213353383	rs74371214	chr2_19	rs73988544,rs6745832	0	EAS;EUR
chr2	214218301	213353577	rs16850226	chr2_19	rs73988544,rs6745832	0	EAS;EUR
chr2	214218389	213353665	rs73990303	chr2_19	rs73988544,rs6745832	0	EAS;EUR
chr2	214219529	213354805	rs116305695	chr2_19	rs73988544,rs6745832	0	EAS;EUR
chr2	214219645	213354921	rs139277347	chr2_19	rs73988544,rs6745832	0	EAS;EUR
chr2	214222215	213357491	rs149518306	chr2_19	rs73988544,rs6745832	0	AFR
chr2	214223793	213359069	rs150466991	chr2_19	rs73988544,rs6745832	0	EAS;EUR
chr2	214224088	213359364	rs58853937	chr2_19	rs73988544,rs6745832	0	AFR
chr2	214225846	213361122	rs73990307	chr2_19	rs73988544,rs6745832	0	AFR
chr2	214226739	213362015	rs73990311	chr2_19	rs73988544,rs6745832	0	AFR
chr2	214227546	213362822	rs115812239	chr2_19	rs73988544,rs6745832	0	EUR
chr2	214227880	213363156	rs138129097	chr2_19	rs73988544,rs6745832	0	EAS;EUR
chr2	214228591	213363867	rs79246157	chr2_19	rs73988544,rs6745832	0	EAS;EUR
chr2	214230241	213365517	rs145249353	chr2_19	rs73988544,rs6745832	0	EAS;EUR
chr2	214230722	213365998	rs370864644	chr2_19	rs73988544,rs6745832	0	EUR
chr2	214231578	213366854	rs112898396	chr2_19	rs73988544,rs6745832	0	EAS;EUR
chr2	214231788	213367064	rs147403891	chr2_19	rs73988544,rs6745832	0	EUR
chr2	214232924	213368200	rs377398667	chr2_19	rs73988544,rs6745832	0	EAS;EUR
chr2	214233175	213368451	rs188871297	chr2_19	rs73988544,rs6745832	0	EAS;EUR
chr2	214233773	213369049	rs114668915	chr2_19	rs73988544,rs6745832	0	EAS;EUR
chr2	214234492	213369768	rs74442522	chr2_19	rs73988544,rs6745832	0	EAS;EUR
chr2	214234630	213369906	rs1552539	chr2_19	rs73988544,rs6745832	0	EAS;EUR
chr2	214235283	213370559	rs115373008	chr2_19	rs73988544,rs6745832	0	EAS;EUR
chr2	214235369	213370645	rs7605061	chr2_19	rs73988544,rs6745832	0	EUR
chr2	214235905	213371181	rs11684890	chr2_19	rs73988544,rs6745832	0	EAS;EUR
chr2	214236165	213371441	rs7608811	chr2_19	rs73988544,rs6745832	0	EAS;EUR
chr2	214236436	213371712	rs138207589	chr2_19	rs73988544,rs6745832	0	EAS;EUR
chr2	214236452	213371728	rs114165042	chr2_19	rs73988544,rs6745832	0	EAS;EUR
chr2	214236455	213371731	rs114533332	chr2_19	rs73988544,rs6745832	0	EAS;EUR
chr2	214236589	213371865	rs73990325	chr2_19	rs73988544,rs6745832	0	EAS;EUR
chr2	214236694	213371970	rs7585278	chr2_19	rs73988544,rs6745832	0	EAS;EUR
chr2	214237051	213372327	rs116462958	chr2_19	rs73988544,rs6745832	0	EAS;EUR
chr2	214237540	213372816	rs115125124	chr2_19	rs73988544,rs6745832	0	EAS;EUR
chr2	214237786	213373062	rs114593023	chr2_19	rs73988544,rs6745832	0	EAS;EUR
chr2	214239152	213374428	rs138586251	chr2_19	rs73988544,rs6745832	0	EAS;EUR
chr2	214242546	213377822	rs9679317	chr2_19	rs73988544,rs6745832	0	AFR
chr2	214243382	213378658	rs6748224	chr2_19	rs73988544,rs6745832	0	AFR
chr2	214244053	213379329	rs75309792	chr2_19	rs73988544,rs6745832	0	EAS;EUR
chr2	214244615	213379891	rs112349504	chr2_19	rs73988544,rs6745832	0	EAS;EUR
chr2	214248880	213384156	rs78786053	chr2_19	rs73988544,rs6745832	0	EAS;EUR
chr2	214249028	213384304	rs1488977	chr2_19	rs73988544,rs6745832	0	EAS;EUR
chr2	214249895	213385171	rs2130057	chr2_19	rs73988544,rs6745832	0	EAS;EUR
chr2	214250952	213386228	rs114325145	chr2_19	rs73988544,rs6745832	0	EAS;EUR
chr2	214251875	213387151	rs17693815	chr2_19	rs73988544,rs6745832	0	EAS;EUR
chr2	214252110	213387386	rs186483799	chr2_19	rs73988544,rs6745832	0	EAS;EUR
chr2	214252115	213387391	rs113431476	chr2_19	rs73988544,rs6745832	0	EAS;EUR
chr2	214252197	213387473	rs375504919	chr2_19	rs73988544,rs6745832	0	EUR
chr2	214252380	213387656	rs370902171	chr2_19	rs73988544,rs6745832	0	EUR
chr2	214252385	213387661	rs373925083	chr2_19	rs73988544,rs6745832	0	EUR
chr2	214253623	213388899	rs137983233	chr2_19	rs73988544,rs6745832	0	EAS;EUR
chr2	214254163	213389439	rs115665464	chr2_19	rs73988544,rs6745832	0	EAS;EUR
chr2	214254646	213389922	rs76459684	chr2_19	rs73988544,rs6745832	0	EAS;EUR
chr2	214255194	213390470	rs17750216	chr2_19	rs73988544,rs6745832	0	EAS;EUR
chr2	214257042	213392318	rs77614612	chr2_19	rs73988544,rs6745832	0	EAS;EUR
chr2	214257815	213393091	rs76957025	chr2_19	rs73988544,rs6745832	0	EAS;EUR
chr2	214258197	213393473	rs16850260	chr2_19	rs73988544,rs6745832	0	EAS;EUR
chr2	214258586	213393862	rs114470107	chr2_19	rs73988544,rs6745832	0	EAS;EUR
chr2	214259218	213394494	rs58019498	chr2_19	rs73988544,rs6745832	0	AFR
chr2	214261018	213396294	rs16850264	chr2_19	rs73988544,rs6745832	0	EAS;EUR
chr2	214261256	213396532	rs16850268	chr2_19	rs73988544,rs6745832	0	EAS;EUR
chr2	214261947	213397223	rs139332371	chr2_19	rs73988544,rs6745832	0	EAS;EUR
chr2	214262089	213397365	rs79086070	chr2_19	rs73988544,rs6745832	0	EAS;EUR
chr2	214262233	213397509	rs113020475	chr2_19	rs73988544,rs6745832	0	AFR
chr2	214262764	213398040	rs116629136	chr2_19	rs73988544,rs6745832	0	EAS;EUR
chr2	214262969	213398245	rs59253430	chr2_19	rs73988544,rs6745832	0	AFR
chr2	214263630	213398906	rs73990341	chr2_19	rs73988544,rs6745832	0	EAS;EUR
chr2	214263919	213399195	rs114571588	chr2_19	rs73988544,rs6745832	0	EAS;EUR
chr2	214265531	213400807	rs79732679	chr2_19	rs73988544,rs6745832	0	AFR
chr2	214266187	213401463	rs16825083	chr2_19	rs73988544,rs6745832	0	EAS;EUR
chr2	214267300	213402576	rs138783233	chr2_19	rs73988544,rs6745832	0	AFR
chr2	214267371	213402647	rs150773607	chr2_19	rs73988544,rs6745832	0	EAS;EUR
chr2	214268020	213403296	rs58554134	chr2_19	rs73988544,rs6745832	0	AFR
chr2	214268306	213403582	rs192090573	chr2_19	rs73988544,rs6745832	0	EAS;EUR
chr2	214269163	213404439	rs373196815	chr2_19	rs73988544,rs6745832	0	AFR
chr2	214270854	213406130	rs16850275	chr2_19	rs73988544,rs6745832	0	AFR
chr2	214271384	213406660	rs60435896	chr2_19	rs73988544,rs6745832	0	AFR
chr2	214271463	213406739	rs77248722	chr2_19	rs73988544,rs6745832	0	EAS;EUR
chr2	214271560	213406836	rs60117167	chr2_19	rs73988544,rs6745832	0	AFR
chr2	214271938	213407214	rs78809990	chr2_19	rs73988544,rs6745832	0	EAS;EUR
chr2	214271989	213407265	rs73990344	chr2_19	rs73988544,rs6745832	0	AFR
chr2	214272141	213407417	rs73990345	chr2_19	rs73988544,rs6745832	0	AFR
chr2	214272529	213407805	rs368016848	chr2_19	rs73988544,rs6745832	0	AFR
chr2	214275587	213410863	rs115611521	chr2_19	rs73988544,rs6745832	0	EAS;EUR
chr2	214276657	213411933	rs144101052	chr2_19	rs73988544,rs6745832	0	EAS;EUR
chr2	214276856	213412132	rs111408125	chr2_19	rs73988544,rs6745832	0	EAS;EUR
chr2	214277348	213412624	rs112769349	chr2_19	rs73988544,rs6745832	0	EAS;EUR
chr2	214277559	213412835	rs16850287	chr2_19	rs73988544,rs6745832	0	EAS;EUR
chr2	214278379	213413655	rs17694263	chr2_19	rs73988544,rs6745832	0	EAS;EUR
chr2	214278718	213413994	rs10498005	chr2_19	rs73988544,rs6745832	0	EAS;EUR
chr2	214281062	213416338	rs17750829	chr2_19	rs73988544,rs6745832	0	EAS;EUR
chr2	214283352	213418628	rs16850307	chr2_19	rs73988544,rs6745832	0	AFR
chr2	214284559	213419835	rs2047838	chr2_19	rs73988544,rs6745832	0	EAS;EUR
chr2	214284749	213420025	rs140739722	chr2_19	rs73988544,rs6745832	0	EUR
chr2	214285898	213421174	rs114185743	chr2_19	rs73988544,rs6745832	0	EAS;EUR
chr2	214286330	213421606	rs73986836	chr2_19	rs73988544,rs6745832	0	EAS
chr2	214287064	213422340	rs75432170	chr2_19	rs73988544,rs6745832	0	EAS
chr2	214289586	213424862	rs79547554	chr2_19	rs73988544,rs6745832	0	EAS
chr2	214290082	213425358	rs113360080	chr2_19	rs73988544,rs6745832	0	EAS
chr2	214290226	213425502	rs113753566	chr2_19	rs73988544,rs6745832	0	EAS
chr2	214291200	213426476	rs151059646	chr2_19	rs73988544,rs6745832	0	EAS;EUR
chr2	214291226	213426502	rs16850325	chr2_19	rs73988544,rs6745832	0	EAS;EUR
chr2	214291876	213427152	rs56169433	chr2_19	rs73988544,rs6745832	0	EAS;EUR
chr2	214292170	213427446	rs16850326	chr2_19	rs73988544,rs6745832	0	AFR
chr2	214293033	213428309	rs114756201	chr2_19	rs73988544,rs6745832	0	EAS;EUR
chr2	214293040	213428316	rs74599497	chr2_19	rs73988544,rs6745832	0	EAS
chr2	214293336	213428612	rs76076493	chr2_19	rs73988544,rs6745832	0	EAS;EUR
chr2	214293421	213428697	rs59713406	chr2_19	rs73988544,rs6745832	0	EAS;EUR
chr2	214293542	213428818	rs112138199	chr2_19	rs73988544,rs6745832	0	EAS;EUR
chr2	214293930	213429206	rs16850334	chr2_19	rs73988544,rs6745832	0	EAS;EUR
chr2	214294064	213429340	rs112836517	chr2_19	rs73988544,rs6745832	0	EAS;EUR
chr2	214294485	213429761	rs74794311	chr2_19	rs73988544,rs6745832	0	EAS;EUR
chr2	214295269	213430545	rs76919062	chr2_19	rs73988544,rs6745832	0	AFR
chr2	214295739	213431015	rs76957445	chr2_19	rs73988544,rs6745832	0	EAS;EUR
chr2	214295893	213431169	rs77030502	chr2_19	rs73988544,rs6745832	0	EAS;EUR
chr2	214296221	213431497	rs60221504	chr2_19	rs73988544,rs6745832	0	EUR
chr2	214296396	213431672	rs78848768	chr2_19	rs73988544,rs6745832	0	EAS;EUR
chr2	214296399	213431675	rs111392448	chr2_19	rs73988544,rs6745832	0	EAS;EUR
chr2	214296544	213431820	rs2134602	chr2_19	rs73988544,rs6745832	0	EAS
chr2	214296622	213431898	rs111812933	chr2_19	rs73988544,rs6745832	0	EAS;EUR
chr2	214297660	213432936	rs2371965	chr2_19	rs73988544,rs6745832	0	AFR;EAS;EUR
chr2	214297881	213433157	rs77805828	chr2_19	rs73988544,rs6745832	0	EAS;EUR
chr2	214298524	213433800	rs2371966	chr2_19	rs73988544,rs6745832	0	EAS;EUR
chr2	214298669	213433945	rs113070298	chr2_19	rs73988544,rs6745832	0	EAS;EUR
chr2	214299031	213434307	rs339824	chr2_19	rs73988544,rs6745832	0	EAS
chr2	214299112	213434388	rs58767621	chr2_19	rs73988544,rs6745832	0	AFR;EAS;EUR
chr2	214299275	213434551	rs58049912	chr2_19	rs73988544,rs6745832	0	AFR
chr2	214300176	213435452	rs2171625	chr2_19	rs73988544,rs6745832	0	AFR;EAS;EUR
chr2	214300373	213435649	rs17694850	chr2_19	rs73988544,rs6745832	0	EAS;EUR
chr2	214300614	213435890	rs17751271	chr2_19	rs73988544,rs6745832	0	EAS;EUR
chr2	214300724	213436000	rs7588433	chr2_19	rs73988544,rs6745832	0	EAS;EUR
chr2	214300945	213436221	rs76381662	chr2_19	rs73988544,rs6745832	0	EAS;EUR
chr2	214301399	213436675	rs138129307	chr2_19	rs73988544,rs6745832	0	EAS;EUR
chr2	214301509	213436785	rs78692372	chr2_19	rs73988544,rs6745832	0	EAS;EUR
chr2	214301603	213436879	rs78645410	chr2_19	rs73988544,rs6745832	0	EAS;EUR
chr2	214301618	213436894	rs61687683	chr2_19	rs73988544,rs6745832	0	AFR
chr2	214301630	213436906	rs79234054	chr2_19	rs73988544,rs6745832	0	AFR
chr2	214301710	213436986	rs112747049	chr2_19	rs73988544,rs6745832	0	EAS;EUR
chr2	214302426	213437702	rs143275706	chr2_19	rs73988544,rs6745832	0	EAS;EUR
chr2	214302465	213437741	rs114728663	chr2_19	rs73988544,rs6745832	0	EAS;EUR
chr2	214302833	213438109	rs73986845	chr2_19	rs73988544,rs6745832	0	AFR
chr2	214303309	213438585	rs116148664	chr2_19	rs73988544,rs6745832	0	EAS;EUR
chr2	214303311	213438587	rs114272065	chr2_19	rs73988544,rs6745832	0	EAS;EUR
chr2	214303523	213438799	rs1604689	chr2_19	rs73988544,rs6745832	0	AFR;EAS;EUR
chr2	214304006	213439282	rs112582355	chr2_19	rs73988544,rs6745832	0	EAS;EUR
chr2	214304015	213439291	rs115804801	chr2_19	rs73988544,rs6745832	0	EAS;EUR
chr2	214304135	213439411	rs6751733	chr2_19	rs73988544,rs6745832	0	AFR
chr2	214304833	213440109	rs61263090	chr2_19	rs73988544,rs6745832	0	AFR
chr2	214305139	213440415	rs141784808	chr2_19	rs73988544,rs6745832	0	EAS;EUR
chr2	214305361	213440637	rs79209898	chr2_19	rs73988544,rs6745832	0	EAS;EUR
chr2	214305455	213440731	rs7565069	chr2_19	rs73988544,rs6745832	0	AFR;EAS;EUR
chr2	214305866	213441142	rs76768517	chr2_19	rs73988544,rs6745832	0	EAS;EUR
chr2	214306874	213442150	rs147797455	chr2_19	rs73988544,rs6745832	0	AFR;EAS;EUR
chr2	214306897	213442173	rs115430324	chr2_19	rs73988544,rs6745832	0	EAS;EUR
chr2	214306961	213442237	rs112847414	chr2_19	rs73988544,rs6745832	0	EAS;EUR
chr2	214306965	213442241	rs1593202	chr2_19	rs73988544,rs6745832	0	AFR
chr2	214307163	213442439	rs4372827	chr2_19	rs73988544,rs6745832	0	AFR;EAS;EUR
chr2	214308636	213443912	rs78300042	chr2_19	rs73988544,rs6745832	0	EAS;EUR
chr2	214308728	213444004	rs75071717	chr2_19	rs73988544,rs6745832	0	EAS;EUR
chr2	214308800	213444076	rs57290289	chr2_19	rs73988544,rs6745832	0	AFR;EAS;EUR
chr2	214309144	213444420	rs58828682	chr2_19	rs73988544,rs6745832	0	AFR;EAS;EUR
chr2	214309485	213444761	rs116429332	chr2_19	rs73988544,rs6745832	0	EAS;EUR
chr2	214309743	213445019	rs113109579	chr2_19	rs73988544,rs6745832	0	EAS;EUR
chr2	214309783	213445059	rs76567160	chr2_19	rs73988544,rs6745832	0	EAS;EUR
chr2	214309905	213445181	rs75715601	chr2_19	rs73988544,rs6745832	0	EAS;EUR
chr2	214310499	213445775	rs80307240	chr2_19	rs73988544,rs6745832	0	EAS;EUR
chr2	214310991	213446267	rs115247888	chr2_19	rs73988544,rs6745832	0	EAS;EUR
chr2	214311176	213446452	rs113820041	chr2_19	rs73988544,rs6745832	0	EAS;EUR
chr2	214311254	213446530	rs368750933	chr2_19	rs73988544,rs6745832	0	EAS;EUR
chr2	214311865	213447141	rs116528412	chr2_19	rs73988544,rs6745832	0	EAS;EUR
chr2	214312340	213447616	rs113692357	chr2_19	rs73988544,rs6745832	0	EAS;EUR
chr2	214312771	213448047	rs112983349	chr2_19	rs73988544,rs6745832	0	EAS
chr2	214312785	213448061	rs113391896	chr2_19	rs73988544,rs6745832	0	EAS;EUR
chr2	214312801	213448077	rs115053772	chr2_19	rs73988544,rs6745832	0	EAS;EUR
chr2	214313248	213448524	rs7561092	chr2_19	rs73988544,rs6745832	0	AFR
chr2	214313369	213448645	rs112132203	chr2_19	rs73988544,rs6745832	0	EAS;EUR
chr2	214313725	213449001	rs114758934	chr2_19	rs73988544,rs6745832	0	EAS;EUR
chr2	214313785	213449061	rs115115080	chr2_19	rs73988544,rs6745832	0	EAS;EUR
chr2	214313796	213449072	rs115798164	chr2_19	rs73988544,rs6745832	0	EAS;EUR
chr2	214314039	213449315	rs79487220	chr2_19	rs73988544,rs6745832	0	AFR;EAS;EUR
chr2	214314944	213450220	rs112927021	chr2_19	rs73988544,rs6745832	0	EAS;EUR
chr2	214315685	213450961	rs79693060	chr2_19	rs73988544,rs6745832	0	EAS;EUR
chr2	214315856	213451132	rs4016243	chr2_19	rs73988544,rs6745832	0	AFR;EAS;EUR
chr2	214316017	213451293	rs1820289	chr2_19	rs73988544,rs6745832	0	EAS;EUR
chr2	214316190	213451466	rs73986851	chr2_19	rs73988544,rs6745832	0	AFR
chr2	214316302	213451578	rs79504248	chr2_19	rs73988544,rs6745832	0	EAS;EUR
chr2	214316479	213451755	rs115822680	chr2_19	rs73988544,rs6745832	0	EAS;EUR
chr2	214316658	213451934	rs2161821	chr2_19	rs73988544,rs6745832	0	AFR;EAS;EUR
chr2	214316700	213451976	rs73986872	chr2_19	rs73988544,rs6745832	0	AFR
chr2	214317044	213452320	rs2008939	chr2_19	rs73988544,rs6745832	0	EAS;EUR
chr2	214317701	213452977	rs17695086	chr2_19	rs73988544,rs6745832	0	EAS;EUR
chr2	214318694	213453970	rs73986874	chr2_19	rs73988544,rs6745832	0	AFR
chr2	214318784	213454060	rs16850351	chr2_19	rs73988544,rs6745832	0	EAS
chr2	214318943	213454219	rs73986875	chr2_19	rs73988544,rs6745832	0	AFR
chr2	214320266	213455542	rs1813393	chr2_19	rs73988544,rs6745832	0	EAS
chr2	214320438	213455714	rs1119235	chr2_19	rs73988544,rs6745832	0	EAS
chr2	214320439	213455715	rs1119234	chr2_19	rs73988544,rs6745832	0	EAS
chr2	214322544	213457820	rs59862062	chr2_19	rs73988544,rs6745832	0	AFR
chr2	214322818	213458094	rs16850366	chr2_19	rs73988544,rs6745832	0	AFR
chr2	214322975	213458251	rs79622420	chr2_19	rs73988544,rs6745832	0	EAS;EUR
chr2	214323154	213458430	rs115027549	chr2_19	rs73988544,rs6745832	0	EAS;EUR
chr2	214323594	213458870	rs77618194	chr2_19	rs73988544,rs6745832	0	EUR
chr2	214323763	213459039	rs74537846	chr2_19	rs73988544,rs6745832	0	EAS;EUR
chr2	214324183	213459459	rs17751591	chr2_19	rs73988544,rs6745832	0	EAS;EUR
chr2	214324201	213459477	rs1503380	chr2_19	rs73988544,rs6745832	0	EAS;EUR
chr2	214324217	213459493	rs1503379	chr2_19	rs73988544,rs6745832	0	AFR;EAS;EUR
chr2	214324649	213459925	rs76706178	chr2_19	rs73988544,rs6745832	0	EAS;EUR
chr2	214324679	213459955	rs115807246	chr2_19	rs73988544,rs6745832	0	EAS;EUR
chr2	214325234	213460510	rs74387935	chr2_19	rs73988544,rs6745832	0	EAS;EUR
chr2	214325371	213460647	rs115455314	chr2_19	rs73988544,rs6745832	0	EAS;EUR
chr2	214326058	213461334	rs73986876	chr2_19	rs73988544,rs6745832	0	AFR
chr2	214326560	213461836	rs114820312	chr2_19	rs73988544,rs6745832	0	EAS;EUR
chr2	214326631	213461907	rs73986877	chr2_19	rs73988544,rs6745832	0	AFR
chr2	214326989	213462265	rs78674645	chr2_19	rs73988544,rs6745832	0	EAS;EUR
chr2	214327045	213462321	rs78595874	chr2_19	rs73988544,rs6745832	0	EAS;EUR
chr2	214327376	213462652	rs1910397	chr2_19	rs73988544,rs6745832	0	AFR
chr2	214327475	213462751	rs112461930	chr2_19	rs73988544,rs6745832	0	EAS;EUR
chr2	214327692	213462968	rs115822395	chr2_19	rs73988544,rs6745832	0	EAS;EUR
chr2	214329985	213465261	rs78229857	chr2_19	rs73988544,rs6745832	0	EAS;EUR
chr2	214330042	213465318	rs77063119	chr2_19	rs73988544,rs6745832	0	EAS;EUR
chr2	214330447	213465723	rs113847509	chr2_19	rs73988544,rs6745832	0	EAS;EUR
chr2	214332141	213467417	rs75563512	chr2_19	rs73988544,rs6745832	0	EAS;EUR
chr2	214332183	213467459	rs80110362	chr2_19	rs73988544,rs6745832	0	EAS;EUR
chr2	214332476	213467752	rs73986880	chr2_19	rs73988544,rs6745832	0	AFR
chr2	214332658	213467934	rs4016237	chr2_19	rs73988544,rs6745832	0	AFR;EAS;EUR
chr2	214332661	213467937	rs144366125	chr2_19	rs73988544,rs6745832	0	EAS;EUR
chr2	214333089	213468365	rs187465929	chr2_19	rs73988544,rs6745832	0	AFR
chr2	214333286	213468562	rs59711456	chr2_19	rs73988544,rs6745832	0	AFR;EAS;EUR
chr2	214333360	213468636	rs201597043	chr2_19	rs73988544,rs6745832	0	EAS;EUR
chr2	214334055	213469331	rs111234642	chr2_19	rs73988544,rs6745832	0	EAS;EUR
chr2	214335294	213470570	rs115641154	chr2_19	rs73988544,rs6745832	0	EAS;EUR
chr2	214335780	213471056	rs114519138	chr2_19	rs73988544,rs6745832	0	EAS;EUR
chr2	214336070	213471346	rs4507042	chr2_19	rs73988544,rs6745832	0	EAS;EUR
chr2	214336099	213471375	rs113037392	chr2_19	rs73988544,rs6745832	0	EUR
chr2	214336735	213472011	rs2081313	chr2_19	rs73988544,rs6745832	0	EAS;EUR
chr2	214336789	213472065	rs2081314	chr2_19	rs73988544,rs6745832	0	EAS;EUR
chr2	214336811	213472087	rs2081315	chr2_19	rs73988544,rs6745832	0	EAS;EUR
chr2	214337687	213472963	rs112098701	chr2_19	rs73988544,rs6745832	0	EAS;EUR
chr2	214338082	213473358	rs58245100	chr2_19	rs73988544,rs6745832	0	AFR
chr2	214338397	213473673	rs111589744	chr2_19	rs73988544,rs6745832	0	EAS;EUR
chr2	214339078	213474354	rs59590839	chr2_19	rs73988544,rs6745832	0	AFR;EAS;EUR
chr2	214339710	213474986	rs2371967	chr2_19	rs73988544,rs6745832	0	EAS;EUR
chr2	214339729	213475005	rs1393905	chr2_19	rs73988544,rs6745832	0	EAS;EUR
chr2	214340149	213475425	rs58071177	chr2_19	rs73988544,rs6745832	0	AFR
chr2	214340546	213475822	rs79443057	chr2_19	rs73988544,rs6745832	0	EAS;EUR
chr2	214341139	213476415	rs76767712	chr2_19	rs73988544,rs6745832	0	EAS;EUR
chr2	214342266	213477542	rs114455207	chr2_19	rs73988544,rs6745832	0	EAS;EUR
chr2	214343084	213478360	rs111783113	chr2_19	rs73988544,rs6745832	0	AFR;EAS;EUR
chr2	214343086	213478362	rs188998565	chr2_19	rs73988544,rs6745832	0	AFR;EAS;EUR
chr2	214343087	213478363	rs192310523	chr2_19	rs73988544,rs6745832	0	AFR;EAS;EUR
chr2	214343519	213478795	rs73986887	chr2_19	rs73988544,rs6745832	0	AFR;EAS;EUR
chr2	214343818	213479094	rs73986888	chr2_19	rs73988544,rs6745832	0	AFR
chr2	214343997	213479273	rs75191906	chr2_19	rs73988544,rs6745832	0	EAS;EUR
chr2	214344156	213479432	rs75432701	chr2_19	rs73988544,rs6745832	0	EAS;EUR
chr2	214344658	213479934	rs112334899	chr2_19	rs73988544,rs6745832	0	EAS;EUR
chr2	214345142	213480418	rs10498007	chr2_19	rs73988544,rs6745832	0	AFR;EAS;EUR
chr2	214345515	213480791	rs10498008	chr2_19	rs73988544,rs6745832	0	AFR;EAS;EUR
chr2	214346920	213482196	rs6720429	chr2_19	rs73988544,rs6745832	0	AFR;EAS;EUR
chr2	214347133	213482409	rs1503376	chr2_19	rs73988544,rs6745832	0	EAS;EUR
chr2	214347187	213482463	rs1503377	chr2_19	rs73988544,rs6745832	0	EAS;EUR
chr2	214347312	213482588	rs1503378	chr2_19	rs73988544,rs6745832	0	EAS;EUR
chr2	214347489	213482765	rs6734444	chr2_19	rs73988544,rs6745832	0	AFR;EAS;EUR
chr2	214347704	213482980	rs114919781	chr2_19	rs73988544,rs6745832	0	EAS;EUR
chr2	214348424	213483700	rs114477900	chr2_19	rs73988544,rs6745832	0	EAS;EUR
chr2	214349723	213484999	rs11444000	chr2_19	rs73988544,rs6745832	0	AFR
chr2	214350701	213485977	rs6757177	chr2_19	rs73988544,rs6745832	0	EAS
chr2	214351166	213486442	rs80012031	chr2_19	rs73988544,rs6745832	0	EAS;EUR
chr2	214351589	213486865	rs1862944	chr2_19	rs73988544,rs6745832	0	EAS;EUR
chr2	214352318	213487594	rs116136024	chr2_19	rs73988544,rs6745832	0	EAS;EUR
chr2	214352702	213487978	rs4633868	chr2_19	rs73988544,rs6745832	0	EAS;EUR
chr2	214352929	213488205	rs1827525	chr2_19	rs73988544,rs6745832	0	EAS;EUR
chr2	214352991	213488267	rs4450545	chr2_19	rs73988544,rs6745832	0	AFR
chr2	214354140	213489416	rs16850416	chr2_19	rs73988544,rs6745832	0	AFR;EAS;EUR
chr2	214354811	213490087	rs61752199	chr2_19	rs73988544,rs6745832	0	EAS;EUR
chr2	214359218	213494494	rs113638522	chr2_19	rs73988544,rs6745832	0	EAS;EUR
chr2	214359515	213494791	rs73988518	chr2_19	rs73988544,rs6745832	0	AFR
chr2	214359796	213495072	rs17701161	chr2_19	rs73988544,rs6745832	0	EAS;EUR
chr2	214360185	213495461	rs73988520	chr2_19	rs73988544,rs6745832	0	AFR;EAS;EUR
chr2	214360889	213496165	rs73988522	chr2_19	rs73988544,rs6745832	0	AFR;EAS;EUR
chr2	214360993	213496269	rs143974072	chr2_19	rs73988544,rs6745832	0	AFR;EAS;EUR
chr2	214361376	213496652	rs141972707	chr2_19	rs73988544,rs6745832	0	EAS;EUR
chr2	214361784	213497060	rs1039503	chr2_19	rs73988544,rs6745832	0	EAS;EUR
chr2	214361846	213497122	rs1039502	chr2_19	rs73988544,rs6745832	0	EAS;EUR
chr2	214362387	213497663	rs16850422	chr2_19	rs73988544,rs6745832	0	AFR;EAS;EUR
chr2	214364617	213499893	rs17752241	chr2_19	rs73988544,rs6745832	0	EAS;EUR
chr2	214368641	213503917	rs58022107	chr2_19	rs73988544,rs6745832	0	AFR;EAS;EUR
chr2	214370446	213505722	rs114696560	chr2_19	rs73988544,rs6745832	0	EAS;EUR
chr2	214373018	213508294	rs112654606	chr2_19	rs73988544,rs6745832	0	AFR;EAS;EUR
chr2	214373157	213508433	rs111536963	chr2_19	rs73988544,rs6745832	0	AFR;EUR
chr2	214373320	213508596	rs111812056	chr2_19	rs73988544,rs6745832	0	AFR;EAS;EUR
chr2	214373564	213508840	rs145818425	chr2_19	rs73988544,rs6745832	0	AFR;EAS;EUR
chr2	214375425	213510701	rs73988525	chr2_19	rs73988544,rs6745832	0	EAS;EUR
chr2	214375447	213510723	rs6754838	chr2_19	rs73988544,rs6745832	0	AFR;EAS;EUR
chr2	214376097	213511373	rs73988527	chr2_19	rs73988544,rs6745832	0	AFR;EAS;EUR
chr2	214376240	213511516	rs73988529	chr2_19	rs73988544,rs6745832	0	AFR;EAS;EUR
chr2	214377521	213512797	rs73988531	chr2_19	rs73988544,rs6745832	0	AFR;EAS;EUR
chr2	214378285	213513561	rs6709713	chr2_19	rs73988544,rs6745832	0	AFR;EAS;EUR
chr2	214379480	213514756	rs60281335	chr2_19	rs73988544,rs6745832	0	AFR;EAS;EUR
chr2	214380547	213515823	rs73988534	chr2_19	rs73988544,rs6745832	0	AFR;EAS;EUR
chr2	214384490	213519766	rs139207701	chr2_19	rs73988544,rs6745832	0	AFR
chr2	214385908	213521184	rs1813708	chr2_19	rs73988544,rs6745832	0	EAS
chr2	214386485	213521761	rs16825100	chr2_19	rs73988544,rs6745832	0	AFR;EAS;EUR
chr2	214386681	213521957	rs17701461	chr2_19	rs73988544,rs6745832	0	EAS;EUR
chr2	214387164	213522440	rs905537	chr2_19	rs73988544,rs6745832	0	AFR;EAS;EUR
chr2	214389582	213524858	rs74400233	chr2_19	rs73988544,rs6745832	0	AFR;EAS;EUR
chr2	214391804	213527080	rs73988535	chr2_19	rs73988544,rs6745832	0	AFR;EAS;EUR
chr2	214396155	213531431	rs7588629	chr2_19	rs73988544,rs6745832	0	AFR;EAS;EUR
chr2	214397864	213533140	rs16850445	chr2_19	rs73988544,rs6745832	0	AFR;EAS;EUR
chr2	214398363	213533639	rs16850447	chr2_19	rs73988544,rs6745832	0	AFR;EAS;EUR
chr2	214398381	213533657	rs116284509	chr2_19	rs73988544,rs6745832	0	EAS;EUR
chr2	214399118	213534394	rs116695687	chr2_19	rs73988544,rs6745832	0	EAS;EUR
chr2	214401738	213537014	rs113958567	chr2_19	rs73988544,rs6745832	0	AFR;EAS;EUR
chr2	214403893	213539169	rs59750241	chr2_19	rs73988544,rs6745832	0	AFR
chr2	214404072	213539348	rs58694237	chr2_19	rs73988544,rs6745832	0	AFR;EUR
chr2	214405080	213540356	rs77026735	chr2_19	rs73988544,rs6745832	0	AFR;EAS;EUR
chr2	214407361	213542637	rs73988538	chr2_19	rs73988544,rs6745832	0	AFR;EAS;EUR
chr2	214408831	213544107	rs60128650	chr2_19	rs73988544,rs6745832	0	AFR
chr2	214409555	213544831	rs78801086	chr2_19	rs73988544,rs6745832	0	AFR;EAS;EUR
chr2	214409784	213545060	rs116280569	chr2_19	rs73988544,rs6745832	0	EAS;EUR
chr2	214410113	213545389	rs77983884	chr2_19	rs73988544,rs6745832	0	AFR;EAS;AFR
chr2	214410966	213546242	rs16850450	chr2_19	rs73988544,rs6745832	0	AFR;EAS
chr2	214411304	213546580	rs143406246	chr2_19	rs73988544,rs6745832	0	AFR;EAS;AFR
chr2	214411589	213546865	rs16850452	chr2_19	rs73988544,rs6745832	0	AFR;EAS;AFR
chr2	214414338	213549614	rs16850456	chr2_19	rs73988544,rs6745832	0	AFR;EAS;EUR
chr2	214417507	213552783	rs61400369	chr2_19	rs73988544,rs6745832	0	AFR;EAS;EUR
chr2	214418185	213553461	rs6756956	chr2_19	rs73988544,rs6745832	0	AFR;EAS;EUR
chr2	214419434	213554710	rs77942389	chr2_19	rs73988544,rs6745832	0	AFR;EAS;EUR
chr2	214419513	213554789	rs78836530	chr2_19	rs73988544,rs6745832	0	AFR;EAS;AFR
chr2	214420578	213555854	rs73988544	chr2_19	rs73988544,rs6745832	1	AFR;EAS;EUR
chr2	214423629	213558905	rs115444265	chr2_19	rs73988544,rs6745832	0	EAS;EUR
chr2	214423859	213559135	rs6745832	chr2_19	rs73988544,rs6745832	1	AFR;EAS;EUR
chr2	214424722	213559998	rs73988545	chr2_19	rs73988544,rs6745832	0	EAS;EUR
chr2	214425574	213560850	rs79475365	chr2_19	rs73988544,rs6745832	0	AFR;EAS;EUR
chr2	214426217	213561493	rs58012287	chr2_19	rs73988544,rs6745832	0	AFR;EAS;EUR
chr2	214426337	213561613	rs114758908	chr2_19	rs73988544,rs6745832	0	EAS;EUR
chr2	214426685	213561961	rs73988546	chr2_19	rs73988544,rs6745832	0	AFR;EAS;EUR
chr2	214427065	213562341	rs73988547	chr2_19	rs73988544,rs6745832	0	AFR;EAS
chr2	214427870	213563146	rs58575813	chr2_19	rs73988544,rs6745832	0	AFR;EAS;EUR
chr2	214428307	213563583	rs77970574	chr2_19	rs73988544,rs6745832	0	EAS;EUR
chr2	214428324	213563600	rs73988548	chr2_19	rs73988544,rs6745832	0	AFR;EAS
chr2	214428731	213564007	rs115831442	chr2_19	rs73988544,rs6745832	0	EAS;EUR
chr2	214429111	213564387	rs142992767	chr2_19	rs73988544,rs6745832	0	EAS;EUR
chr2	214429633	213564909	rs61614177	chr2_19	rs73988544,rs6745832	0	AFR;EAS;EUR
chr2	214430651	213565927	rs16850465	chr2_19	rs73988544,rs6745832	0	AFR;EAS;EUR
chr2	214430874	213566150	rs115946325	chr2_19	rs73988544,rs6745832	0	EAS;EUR
chr2	214431037	213566313	rs115383556	chr2_19	rs73988544,rs6745832	0	EAS;EUR
chr2	214432255	213567531	rs375108981	chr2_19	rs73988544,rs6745832	0	AFR;EAS
chr2	214437737	213573013	rs61063237	chr2_19	rs73988544,rs6745832	0	AFR;EAS
chr2	214438080	213573356	rs73988551	chr2_19	rs73988544,rs6745832	0	EAS
chr2	214439184	213574460	rs16850469	chr2_19	rs73988544,rs6745832	0	EAS;EUR
chr2	214439390	213574666	rs59916166	chr2_19	rs73988544,rs6745832	0	EAS;EUR
chr2	214440032	213575308	rs16850471	chr2_19	rs73988544,rs6745832	0	AFR;EAS;EUR
chr2	214440117	213575393	rs73988552	chr2_19	rs73988544,rs6745832	0	AFR;EAS;EUR
chr2	214440868	213576144	rs60380038	chr2_19	rs73988544,rs6745832	0	AFR;EAS;EUR
chr2	214441599	213576875	rs58087200	chr2_19	rs73988544,rs6745832	0	AFR;EAS;EUR
chr2	214441946	213577222	rs73988554	chr2_19	rs73988544,rs6745832	0	AFR;EAS;EUR
chr2	214443820	213579096	rs140949640	chr2_19	rs73988544,rs6745832	0	EAS;EUR
chr2	214443899	213579175	rs78205250	chr2_19	rs73988544,rs6745832	0	EAS;EUR
chr2	214444108	213579384	rs78370262	chr2_19	rs73988544,rs6745832	0	EAS;EUR
chr2	214445004	213580280	rs115204947	chr2_19	rs73988544,rs6745832	0	EAS;EUR
chr2	214445528	213580804	rs77652507	chr2_19	rs73988544,rs6745832	0	EAS;EUR
chr2	214445677	213580953	rs114837427	chr2_19	rs73988544,rs6745832	0	EAS;EUR
chr2	214446322	213581598	rs116626794	chr2_19	rs73988544,rs6745832	0	EAS;EUR
chr2	214446400	213581676	rs78506781	chr2_19	rs73988544,rs6745832	0	EAS;EUR
chr2	214446467	213581743	rs116347711	chr2_19	rs73988544,rs6745832	0	EAS;EUR
chr2	214448335	213583611	rs115089946	chr2_19	rs73988544,rs6745832	0	EAS;EUR
chr2	214448400	213583676	rs75209413	chr2_19	rs73988544,rs6745832	0	EAS;EUR
chr2	214448646	213583922	rs114591977	chr2_19	rs73988544,rs6745832	0	EAS;EUR
chr2	214449326	213584602	rs73988557	chr2_19	rs73988544,rs6745832	0	AFR
chr2	214450284	213585560	rs76873187	chr2_19	rs73988544,rs6745832	0	EAS;EUR
chr2	214450750	213586026	rs16850472	chr2_19	rs73988544,rs6745832	0	AFR;EAS;EUR
chr2	214450807	213586083	rs17752934	chr2_19	rs73988544,rs6745832	0	EAS;EUR
chr2	214451162	213586438	rs75386345	chr2_19	rs73988544,rs6745832	0	EAS;EUR
chr2	214452770	213588046	rs56032998	chr2_19	rs73988544,rs6745832	0	AFR;EAS
chr2	214452915	213588191	rs147098096	chr2_19	rs73988544,rs6745832	0	EAS
chr2	214454539	213589815	rs7563061	chr2_19	rs73988544,rs6745832	0	EAS;EUR
chr2	214455163	213590439	rs79156350	chr2_19	rs73988544,rs6745832	0	EAS;EUR
chr2	214457257	213592533	rs7587811	chr2_19	rs73988544,rs6745832	0	AFR;EAS;EUR
chr2	214458701	213593977	rs113416551	chr2_19	rs73988544,rs6745832	0	AFR;EAS;EUR
chr2	214461920	213597196	rs115957310	chr2_19	rs73988544,rs6745832	0	EAS;EUR
chr2	214462426	213597702	rs138466801	chr2_19	rs73988544,rs6745832	0	EUR
chr2	214463002	213598278	rs73988561	chr2_19	rs73988544,rs6745832	0	AFR;EAS;EUR
chr2	214466769	213602045	rs115621776	chr2_19	rs73988544,rs6745832	0	EAS;EUR
chr2	214467086	213602362	rs111807644	chr2_19	rs73988544,rs6745832	0	AFR;EAS;EUR
chr2	214468141	213603417	rs16850518	chr2_19	rs73988544,rs6745832	0	EUR
chr2	214472450	213607726	rs889887	chr2_19	rs73988544,rs6745832	0	EAS;EUR
chr2	214474034	213609310	rs17753327	chr2_19	rs73988544,rs6745832	0	EAS;EUR
chr2	214476848	213612124	rs16850557	chr2_19	rs73988544,rs6745832	0	EAS;EUR
chr2	214481358	213616634	rs116603970	chr2_19	rs73988544,rs6745832	0	EAS;EUR
chr2	214483708	213618984	rs142276017	chr2_19	rs73988544,rs6745832	0	EAS;EUR
chr2	214484691	213619967	rs112731192	chr2_19	rs73988544,rs6745832	0	EAS;EUR
chr2	214485551	213620827	rs115469421	chr2_19	rs73988544,rs6745832	0	EAS;EUR
chr2	214488684	213623960	rs142337422	chr2_19	rs73988544,rs6745832	0	EAS;EUR
chr2	214489538	213624814	rs114849510	chr2_19	rs73988544,rs6745832	0	EAS;EUR
chr2	214490415	213625691	rs377699196	chr2_19	rs73988544,rs6745832	0	EAS;EUR
chr2	214492384	213627660	rs113942572	chr2_19	rs73988544,rs6745832	0	EAS;EUR
chr2	214494977	213630253	rs78918877	chr2_19	rs73988544,rs6745832	0	EUR
chr2	214497441	213632717	rs142169621	chr2_19	rs73988544,rs6745832	0	EUR
chr2	214497822	213633098	rs79370332	chr2_19	rs73988544,rs6745832	0	EUR
chr2	214508320	213643596	rs115380378	chr2_19	rs73988544,rs6745832	0	EUR
chr2	214508448	213643724	rs116755055	chr2_19	rs73988544,rs6745832	0	EUR
chr2	214508575	213643851	rs112823370	chr2_19	rs73988544,rs6745832	0	EUR
chr2	214508683	213643959	rs111574473	chr2_19	rs73988544,rs6745832	0	EUR
chr2	214510367	213645643	rs61476874	chr2_19	rs73988544,rs6745832	0	EUR
chr2	214511699	213646975	rs73988576	chr2_19	rs73988544,rs6745832	0	EUR
chr2	214513701	213648977	rs142372618	chr2_19	rs73988544,rs6745832	0	EUR
chr2	214520637	213655913	rs60156223	chr2_19	rs73988544,rs6745832	0	EUR
chr2	214521539	213656815	rs114481720	chr2_19	rs73988544,rs6745832	0	EUR
chr2	214521590	213656866	rs115044511	chr2_19	rs73988544,rs6745832	0	EUR
chr2	214521942	213657218	rs73988580	chr2_19	rs73988544,rs6745832	0	EUR
chr2	214523067	213658343	rs114497351	chr2_19	rs73988544,rs6745832	0	EUR
chr2	214527137	213662413	rs73988582	chr2_19	rs73988544,rs6745832	0	EUR
chr2	214530702	213665978	rs1996272	chr2_19	rs73988544,rs6745832	0	EUR
chr2	214532479	213667755	rs17753994	chr2_19	rs73988544,rs6745832	0	EUR
chr2	214536333	213671609	rs114354051	chr2_19	rs73988544,rs6745832	0	EUR
chr2	214539105	213674381	rs115976339	chr2_19	rs73988544,rs6745832	0	EUR
chr2	214541753	213677029	rs145026301	chr2_19	rs73988544,rs6745832	0	EUR
chr2	214545519	213680795	rs111521007	chr2_19	rs73988544,rs6745832	0	EUR
chr2	214548641	213683917	rs77338387	chr2_19	rs73988544,rs6745832	0	EUR
chr2	214549620	213684896	rs113725368	chr2_19	rs73988544,rs6745832	0	EUR
chr2	214564696	213699972	rs75488828	chr2_19	rs73988544,rs6745832	0	EUR
chr2	214565693	213700969	rs142078600	chr2_19	rs73988544,rs6745832	0	EUR
chr2	214566165	213701441	rs115781709	chr2_19	rs73988544,rs6745832	0	EUR
chr2	214566202	213701478	rs114542779	chr2_19	rs73988544,rs6745832	0	EUR
chr2	214566892	213702168	rs115112875	chr2_19	rs73988544,rs6745832	0	EUR
chr2	214567382	213702658	rs114497549	chr2_19	rs73988544,rs6745832	0	EUR
chr2	214567404	213702680	rs116501261	chr2_19	rs73988544,rs6745832	0	EUR
chr2	222098118	221233398	rs2893646	chr2_20	rs7607367,rs11886107	0	AFR;EAS;EUR
chr2	222104303	221239583	rs13414219	chr2_20	rs7607367,rs11886107	0	AFR;EAS;EUR
chr2	222105141	221240421	rs7578054	chr2_20	rs7607367,rs11886107	0	AFR;EAS;EUR
chr2	222108426	221243706	rs10498104	chr2_20	rs7607367,rs11886107	0	AFR;EAS;EUR
chr2	222110858	221246138	rs7580353	chr2_20	rs7607367,rs11886107	0	AFR;EAS;EUR
chr2	222111191	221246471	rs7607367	chr2_20	rs7607367,rs11886107	1	AFR;EAS;EUR
chr2	222111527	221246807	rs13407026	chr2_20	rs7607367,rs11886107	0	AFR;EAS;EUR
chr2	222111951	221247231	rs1946595	chr2_20	rs7607367,rs11886107	0	AFR;EAS;EUR
chr2	222113206	221248486	rs11886107	chr2_20	rs7607367,rs11886107	1	AFR;EAS;EUR
chr2	222115429	221250709	rs7569560	chr2_20	rs7607367,rs11886107	0	AFR;EAS;EUR
chr2	222115485	221250765	rs7569651	chr2_20	rs7607367,rs11886107	0	AFR;EAS;EUR
chr2	222115667	221250947	rs28645699	chr2_20	rs7607367,rs11886107	0	AFR;EAS;EUR
chr2	222116607	221251887	rs7421499	chr2_20	rs7607367,rs11886107	0	AFR;EAS;EUR
chr2	222117927	221253207	rs7594260	chr2_20	rs7607367,rs11886107	0	AFR;EAS;EUR
chr2	222119829	221255109	rs1432254	chr2_20	rs7607367,rs11886107	0	EAS;EUR
chr2	222120414	221255694	rs10170506	chr2_20	rs7607367,rs11886107	0	AFR;EAS;EUR
chr2	222120848	221256128	rs13423224	chr2_20	rs7607367,rs11886107	0	AFR;EAS;EUR
chr2	222123149	221258429	rs7593432	chr2_20	rs7607367,rs11886107	0	AFR;EAS;EUR
chr2	222123349	221258629	rs1835809	chr2_20	rs7607367,rs11886107	0	EAS;EUR
chr2	222124204	221259484	rs62178758	chr2_20	rs7607367,rs11886107	0	EAS
chr2	222124923	221260203	rs9678636	chr2_20	rs7607367,rs11886107	0	AFR;EAS;EUR
chr2	222125791	221261071	rs11683157	chr2_20	rs7607367,rs11886107	0	EAS;EUR
chr2	222126296	221261576	rs60586546	chr2_20	rs7607367,rs11886107	0	EAS;EUR
chr2	222126597	221261877	rs13407134	chr2_20	rs7607367,rs11886107	0	AFR;EAS;EUR
chr2	222126699	221261979	rs36049891	chr2_20	rs7607367,rs11886107	0	EAS;EUR
chr2	222126957	221262237	rs11888630	chr2_20	rs7607367,rs11886107	0	AFR;EAS;EUR
chr2	222126977	221262257	rs7567595	chr2_20	rs7607367,rs11886107	0	AFR;EAS;EUR
chr2	222128712	221263992	rs11891472	chr2_20	rs7607367,rs11886107	0	AFR;EAS;EUR
chr2	222129284	221264564	rs1432261	chr2_20	rs7607367,rs11886107	0	AFR;EAS;EUR
chr2	222129525	221264805	rs4592844	chr2_20	rs7607367,rs11886107	0	EAS;EUR
chr2	222131416	221266696	rs1036144	chr2_20	rs7607367,rs11886107	0	EAS;EUR
chr2	222131911	221267191	rs6436245	chr2_20	rs7607367,rs11886107	0	AFR;EAS;EUR
chr2	222132039	221267319	rs7593159	chr2_20	rs7607367,rs11886107	0	AFR;EAS;EUR
chr2	222132264	221267544	rs10591933	chr2_20	rs7607367,rs11886107	0	EAS
chr2	222135380	221270660	rs1002741	chr2_20	rs7607367,rs11886107	0	EAS;EUR
chr2	222135584	221270864	rs13030202	chr2_20	rs7607367,rs11886107	0	EAS;EUR
chr2	222139436	221274716	rs10198617	chr2_20	rs7607367,rs11886107	0	EAS
chr2	237520461	236611818	rs148830672	chr2_21	rs74571727,rs7609173	0	EAS
chr2	237521538	236612895	rs149571637	chr2_21	rs74571727,rs7609173	0	EAS
chr2	237522076	236613433	rs79026534	chr2_21	rs74571727,rs7609173	0	EAS
chr2	237522183	236613540	rs76488741	chr2_21	rs74571727,rs7609173	0	EAS
chr2	237522641	236613998	rs7574312	chr2_21	rs74571727,rs7609173	0	EUR
chr2	237523042	236614399	rs7583976	chr2_21	rs74571727,rs7609173	0	EUR
chr2	237524108	236615465	rs11693056	chr2_21	rs74571727,rs7609173	0	EUR
chr2	237524745	236616102	rs59896633	chr2_21	rs74571727,rs7609173	0	EUR
chr2	237525255	236616612	rs7582475	chr2_21	rs74571727,rs7609173	0	EAS
chr2	237525630	236616987	rs73131762	chr2_21	rs74571727,rs7609173	0	EUR
chr2	237525893	236617250	rs6736272	chr2_21	rs74571727,rs7609173	0	EAS;EUR
chr2	237527424	236618781	rs6431480	chr2_21	rs74571727,rs7609173	0	EAS;EUR
chr2	237528780	236620137	rs60019402	chr2_21	rs74571727,rs7609173	0	EUR
chr2	237529332	236620689	rs7606770	chr2_21	rs74571727,rs7609173	0	EUR
chr2	237529751	236621108	rs79954794	chr2_21	rs74571727,rs7609173	0	AFR;EUR
chr2	237530111	236621468	rs113125587	chr2_21	rs74571727,rs7609173	0	EAS;EUR
chr2	237530615	236621972	rs13420397	chr2_21	rs74571727,rs7609173	0	EAS;EUR
chr2	237531087	236622444	rs76172293	chr2_21	rs74571727,rs7609173	0	EUR
chr2	237531114	236622471	rs11690653	chr2_21	rs74571727,rs7609173	0	EAS;EUR
chr2	237531483	236622840	rs7585426	chr2_21	rs74571727,rs7609173	0	EAS;EUR
chr2	237531520	236622877	rs11381629	chr2_21	rs74571727,rs7609173	0	EAS;EUR
chr2	237531694	236623051	rs7585430	chr2_21	rs74571727,rs7609173	0	EAS;EUR
chr2	237531744	236623101	rs7588292	chr2_21	rs74571727,rs7609173	0	EAS;EUR
chr2	237531788	236623145	rs7588302	chr2_21	rs74571727,rs7609173	0	EAS;EUR
chr2	237531806	236623163	rs73997471	chr2_21	rs74571727,rs7609173	0	EAS
chr2	237531824	236623181	rs7588320	chr2_21	rs74571727,rs7609173	0	EAS;EUR
chr2	237531981	236623338	rs7597673	chr2_21	rs74571727,rs7609173	0	EAS;EUR
chr2	237532043	236623400	rs60348216	chr2_21	rs74571727,rs7609173	0	AFR;EAS;EUR
chr2	237532172	236623529	rs55973429	chr2_21	rs74571727,rs7609173	0	AFR;EAS;EUR
chr2	237532245	236623602	rs199561148	chr2_21	rs74571727,rs7609173	0	EAS
chr2	237532517	236623874	rs118005986	chr2_21	rs74571727,rs7609173	0	EAS
chr2	237532918	236624275	rs73997486	chr2_21	rs74571727,rs7609173	0	EAS
chr2	237533143	236624500	rs73997488	chr2_21	rs74571727,rs7609173	0	EAS;EUR
chr2	237533829	236625186	rs60033478	chr2_21	rs74571727,rs7609173	0	EAS;EUR
chr2	237533985	236625342	rs60827745	chr2_21	rs74571727,rs7609173	0	EAS;EUR
chr2	237534239	236625596	rs111438504	chr2_21	rs74571727,rs7609173	0	EAS;EUR
chr2	237534240	236625597	rs78133001	chr2_21	rs74571727,rs7609173	0	EAS
chr2	237534331	236625688	rs73131800	chr2_21	rs74571727,rs7609173	0	EAS;EUR
chr2	237534349	236625706	rs59406520	chr2_21	rs74571727,rs7609173	0	EAS;EUR
chr2	237534400	236625757	rs73131802	chr2_21	rs74571727,rs7609173	0	EAS;EUR
chr2	237534979	236626336	rs59798650	chr2_21	rs74571727,rs7609173	0	EUR
chr2	237535062	236626419	rs74571727	chr2_21	rs74571727,rs7609173	1	AFR;EUR
chr2	237535155	236626512	rs7609173	chr2_21	rs74571727,rs7609173	1	AFR;EAS;EUR
chr2	237535243	236626600	rs7597208	chr2_21	rs74571727,rs7609173	0	AFR;EAS;EUR
chr2	237535261	236626618	rs7609314	chr2_21	rs74571727,rs7609173	0	EAS;EUR
chr2	237535264	236626621	rs7583612	chr2_21	rs74571727,rs7609173	0	EUR
chr2	237535269	236626626	rs116870686	chr2_21	rs74571727,rs7609173	0	EAS
chr2	237535463	236626820	rs1869098	chr2_21	rs74571727,rs7609173	0	EUR
chr2	237535578	236626935	rs1869097	chr2_21	rs74571727,rs7609173	0	EAS;EUR
chr2	237535830	236627187	rs1869096	chr2_21	rs74571727,rs7609173	0	EAS;EUR
chr2	237536156	236627513	rs61055315	chr2_21	rs74571727,rs7609173	0	AFR;EUR
chr2	237536453	236627810	rs11676390	chr2_21	rs74571727,rs7609173	0	EAS;EUR
chr2	237537158	236628515	rs117525050	chr2_21	rs74571727,rs7609173	0	EAS
chr2	237537372	236628729	rs117871866	chr2_21	rs74571727,rs7609173	0	EAS
chr2	237537464	236628821	rs7591333	chr2_21	rs74571727,rs7609173	0	EUR
chr2	237537471	236628828	rs7563998	chr2_21	rs74571727,rs7609173	0	EUR
chr2	237537565	236628922	rs149026436	chr2_21	rs74571727,rs7609173	0	EUR
chr2	237537566	236628923	rs182115547	chr2_21	rs74571727,rs7609173	0	EUR
chr2	237537608	236628965	rs191622060	chr2_21	rs74571727,rs7609173	0	EUR
chr2	237537631	236628988	rs113526442	chr2_21	rs74571727,rs7609173	0	EUR
chr2	237537943	236629300	rs7608195	chr2_21	rs74571727,rs7609173	0	EAS
chr2	237539128	236630485	rs35822026	chr2_21	rs74571727,rs7609173	0	EUR
chr2	237539217	236630574	rs113962993	chr2_21	rs74571727,rs7609173	0	EAS;EUR
chr2	237539332	236630689	rs76645992	chr2_21	rs74571727,rs7609173	0	EAS
chr2	237539829	236631186	rs73133517	chr2_21	rs74571727,rs7609173	0	EUR
chr2	237540302	236631659	rs79899748	chr2_21	rs74571727,rs7609173	0	EAS
chr2	237541126	236632483	rs55940278	chr2_21	rs74571727,rs7609173	0	EUR
chr2	241113452	240174035	rs6738859	chr2_22	rs10166264,rs59043333,rs72994757	0	EAS;EUR
chr2	241113585	240174168	rs73008792	chr2_22	rs10166264,rs59043333,rs72994757	0	EUR
chr2	241113670	240174253	rs13424851	chr2_22	rs10166264,rs59043333,rs72994757	0	EAS
chr2	241113838	240174421	rs28578330	chr2_22	rs10166264,rs59043333,rs72994757	0	EAS
chr2	241114180	240174763	rs1495923	chr2_22	rs10166264,rs59043333,rs72994757	0	EAS;EUR
chr2	241114429	240175012	rs28375260	chr2_22	rs10166264,rs59043333,rs72994757	0	EAS;EUR
chr2	241114551	240175134	rs11676020	chr2_22	rs10166264,rs59043333,rs72994757	0	EAS;EUR
chr2	241114873	240175456	rs7592376	chr2_22	rs10166264,rs59043333,rs72994757	0	EAS;EUR
chr2	241114971	240175554	rs112468743	chr2_22	rs10166264,rs59043333,rs72994757	0	EAS;EUR
chr2	241114974	240175557	rs75789425	chr2_22	rs10166264,rs59043333,rs72994757	0	EAS;EUR
chr2	241114975	240175558	rs76705788	chr2_22	rs10166264,rs59043333,rs72994757	0	EAS;EUR
chr2	241115007	240175590	rs7589186	chr2_22	rs10166264,rs59043333,rs72994757	0	EAS;EUR
chr2	241115074	240175657	rs7595142	chr2_22	rs10166264,rs59043333,rs72994757	0	EAS;EUR
chr2	241115175	240175758	rs7576347	chr2_22	rs10166264,rs59043333,rs72994757	0	EAS;EUR
chr2	241115250	240175833	rs7592125	chr2_22	rs10166264,rs59043333,rs72994757	0	EAS;EUR
chr2	241115286	240175869	rs4853994	chr2_22	rs10166264,rs59043333,rs72994757	0	EAS;EUR
chr2	241115331	240175914	rs4853993	chr2_22	rs10166264,rs59043333,rs72994757	0	EAS;EUR
chr2	241115392	240175975	rs4853957	chr2_22	rs10166264,rs59043333,rs72994757	0	EAS;EUR
chr2	241115555	240176138	rs4853992	chr2_22	rs10166264,rs59043333,rs72994757	0	EAS;EUR
chr2	241115571	240176154	rs4853956	chr2_22	rs10166264,rs59043333,rs72994757	0	EAS;EUR
chr2	241115613	240176196	rs4853955	chr2_22	rs10166264,rs59043333,rs72994757	0	EUR
chr2	241116260	240176843	rs11687436	chr2_22	rs10166264,rs59043333,rs72994757	0	EAS;EUR
chr2	241116294	240176877	rs11695587	chr2_22	rs10166264,rs59043333,rs72994757	0	EAS;EUR
chr2	241116328	240176911	rs13432013	chr2_22	rs10166264,rs59043333,rs72994757	0	EAS;EUR
chr2	241116429	240177012	rs13426442	chr2_22	rs10166264,rs59043333,rs72994757	0	EAS;EUR
chr2	241116490	240177073	rs13431451	chr2_22	rs10166264,rs59043333,rs72994757	0	EAS;EUR
chr2	241116645	240177228	rs13416616	chr2_22	rs10166264,rs59043333,rs72994757	0	EAS;EUR
chr2	241116720	240177303	rs13384066	chr2_22	rs10166264,rs59043333,rs72994757	0	EAS;EUR
chr2	241116754	240177337	rs6731007	chr2_22	rs10166264,rs59043333,rs72994757	0	EAS;EUR
chr2	241116756	240177339	rs6747654	chr2_22	rs10166264,rs59043333,rs72994757	0	EAS;EUR
chr2	241116771	240177354	rs6742101	chr2_22	rs10166264,rs59043333,rs72994757	0	EAS;EUR
chr2	241116787	240177370	rs6731014	chr2_22	rs10166264,rs59043333,rs72994757	0	EAS;EUR
chr2	241116799	240177382	rs6731023	chr2_22	rs10166264,rs59043333,rs72994757	0	EAS;EUR
chr2	241116892	240177475	rs6751432	chr2_22	rs10166264,rs59043333,rs72994757	0	EAS;EUR
chr2	241116929	240177512	rs6747907	chr2_22	rs10166264,rs59043333,rs72994757	0	EAS;EUR
chr2	241117033	240177616	rs6750901	chr2_22	rs10166264,rs59043333,rs72994757	0	EAS;EUR
chr2	241117518	240178101	rs4853990	chr2_22	rs10166264,rs59043333,rs72994757	0	EAS;EUR
chr2	241117578	240178161	rs4853989	chr2_22	rs10166264,rs59043333,rs72994757	0	EAS;EUR
chr2	241117964	240178547	rs13420576	chr2_22	rs10166264,rs59043333,rs72994757	0	EAS;EUR
chr2	241118099	240178682	rs56333302	chr2_22	rs10166264,rs59043333,rs72994757	0	EAS;EUR
chr2	241118165	240178748	rs55962823	chr2_22	rs10166264,rs59043333,rs72994757	0	EAS;EUR
chr2	241118225	240178808	rs56048712	chr2_22	rs10166264,rs59043333,rs72994757	0	EAS;EUR
chr2	241118322	240178905	rs55682133	chr2_22	rs10166264,rs59043333,rs72994757	0	EAS;EUR
chr2	241118579	240179162	rs66689618	chr2_22	rs10166264,rs59043333,rs72994757	0	EAS;EUR
chr2	241118643	240179226	rs66478946	chr2_22	rs10166264,rs59043333,rs72994757	0	EAS;EUR
chr2	241118773	240179356	rs62184671	chr2_22	rs10166264,rs59043333,rs72994757	0	EAS;EUR
chr2	241118793	240179376	rs74002414	chr2_22	rs10166264,rs59043333,rs72994757	0	AFR
chr2	241118898	240179481	rs67611898	chr2_22	rs10166264,rs59043333,rs72994757	0	EAS;EUR
chr2	241118989	240179572	rs62184672	chr2_22	rs10166264,rs59043333,rs72994757	0	EAS;EUR
chr2	241119096	240179679	rs62184673	chr2_22	rs10166264,rs59043333,rs72994757	0	EAS;EUR
chr2	241119212	240179795	rs62184674	chr2_22	rs10166264,rs59043333,rs72994757	0	EAS;EUR
chr2	241119305	240179888	rs62184675	chr2_22	rs10166264,rs59043333,rs72994757	0	EAS;EUR
chr2	241119540	240180123	rs59763573	chr2_22	rs10166264,rs59043333,rs72994757	0	EAS;EUR
chr2	241119541	240180124	rs58463596	chr2_22	rs10166264,rs59043333,rs72994757	0	EAS;EUR
chr2	241119626	240180209	rs59894862	chr2_22	rs10166264,rs59043333,rs72994757	0	EAS;EUR
chr2	241119642	240180225	rs62184677	chr2_22	rs10166264,rs59043333,rs72994757	0	EAS;EUR
chr2	241119882	240180465	rs11675699	chr2_22	rs10166264,rs59043333,rs72994757	0	EAS;EUR
chr2	241119891	240180474	rs11677915	chr2_22	rs10166264,rs59043333,rs72994757	0	EAS;EUR
chr2	241120017	240180600	rs7607961	chr2_22	rs10166264,rs59043333,rs72994757	0	EAS;EUR
chr2	241120103	240180686	rs7585676	chr2_22	rs10166264,rs59043333,rs72994757	0	EAS;EUR
chr2	241120186	240180769	rs7575274	chr2_22	rs10166264,rs59043333,rs72994757	0	EAS;EUR
chr2	241120189	240180772	rs7575275	chr2_22	rs10166264,rs59043333,rs72994757	0	EAS;EUR
chr2	241120339	240180922	rs6437297	chr2_22	rs10166264,rs59043333,rs72994757	0	EAS;EUR
chr2	241120401	240180984	rs6437298	chr2_22	rs10166264,rs59043333,rs72994757	0	EUR
chr2	241120696	240181279	rs10179561	chr2_22	rs10166264,rs59043333,rs72994757	0	EAS
chr2	241120714	240181297	rs6725520	chr2_22	rs10166264,rs59043333,rs72994757	0	EAS;EUR
chr2	241120744	240181327	rs6742504	chr2_22	rs10166264,rs59043333,rs72994757	0	EAS;EUR
chr2	241120786	240181369	rs6746001	chr2_22	rs10166264,rs59043333,rs72994757	0	EAS;EUR
chr2	241120787	240181370	rs6736900	chr2_22	rs10166264,rs59043333,rs72994757	0	EAS;EUR
chr2	241120829	240181412	rs11695283	chr2_22	rs10166264,rs59043333,rs72994757	0	EAS;EUR
chr2	241120894	240181477	rs11695290	chr2_22	rs10166264,rs59043333,rs72994757	0	EAS;EUR
chr2	241120934	240181517	rs79487710	chr2_22	rs10166264,rs59043333,rs72994757	0	EAS;EUR
chr2	241121115	240181698	rs9288731	chr2_22	rs10166264,rs59043333,rs72994757	0	AFR;EAS;EUR
chr2	241121123	240181706	rs9288732	chr2_22	rs10166264,rs59043333,rs72994757	0	AFR;EAS;EUR
chr2	241121150	240181733	rs9288733	chr2_22	rs10166264,rs59043333,rs72994757	0	EAS;EUR
chr2	241121173	240181756	rs10172466	chr2_22	rs10166264,rs59043333,rs72994757	0	EAS
chr2	241121258	240181841	rs75933299	chr2_22	rs10166264,rs59043333,rs72994757	0	AFR
chr2	241121262	240181845	rs35120743	chr2_22	rs10166264,rs59043333,rs72994757	0	EAS;EUR
chr2	241121301	240181884	rs11677527	chr2_22	rs10166264,rs59043333,rs72994757	0	EAS;EUR
chr2	241121347	240181930	rs11677535	chr2_22	rs10166264,rs59043333,rs72994757	0	EAS;EUR
chr2	241121411	240181994	rs11674289	chr2_22	rs10166264,rs59043333,rs72994757	0	EAS;EUR
chr2	241121553	240182136	rs10933572	chr2_22	rs10166264,rs59043333,rs72994757	0	AFR;EAS;EUR
chr2	241121674	240182257	rs11682324	chr2_22	rs10166264,rs59043333,rs72994757	0	EUR
chr2	241121695	240182278	rs28535893	chr2_22	rs10166264,rs59043333,rs72994757	0	EAS;EUR
chr2	241121741	240182324	rs10182890	chr2_22	rs10166264,rs59043333,rs72994757	0	AFR;EAS;EUR
chr2	241121831	240182414	rs10180059	chr2_22	rs10166264,rs59043333,rs72994757	0	AFR;EAS;EUR
chr2	241122017	240182600	rs10175689	chr2_22	rs10166264,rs59043333,rs72994757	0	AFR;EAS;EUR
chr2	241122077	240182660	rs10166264	chr2_22	rs10166264,rs59043333,rs72994757	1	AFR
chr2	241122178	240182761	rs10175796	chr2_22	rs10166264,rs59043333,rs72994757	0	EAS;EUR
chr2	241122248	240182831	rs6749985	chr2_22	rs10166264,rs59043333,rs72994757	0	EAS;EUR
chr2	241122913	240183496	rs62184678	chr2_22	rs10166264,rs59043333,rs72994757	0	EAS;EUR
chr2	241123298	240183881	rs59043333	chr2_22	rs10166264,rs59043333,rs72994757	1	AFR;EAS;EUR
chr2	241123331	240183914	rs7602285	chr2_22	rs10166264,rs59043333,rs72994757	0	EAS
chr2	241123332	240183915	rs59647838	chr2_22	rs10166264,rs59043333,rs72994757	0	AFR;EAS;EUR
chr2	241123366	240183949	rs72994743	chr2_22	rs10166264,rs59043333,rs72994757	0	EAS;EUR
chr2	241123436	240184019	rs35270808	chr2_22	rs10166264,rs59043333,rs72994757	0	AFR;EAS;EUR
chr2	241123458	240184041	rs72994746	chr2_22	rs10166264,rs59043333,rs72994757	0	AFR;EAS;EUR
chr2	241123459	240184042	rs72994748	chr2_22	rs10166264,rs59043333,rs72994757	0	AFR;EAS;EUR
chr2	241123546	240184129	rs7605872	chr2_22	rs10166264,rs59043333,rs72994757	0	EAS
chr2	241123603	240184186	rs7597331	chr2_22	rs10166264,rs59043333,rs72994757	0	EUR
chr2	241123648	240184231	rs7597421	chr2_22	rs10166264,rs59043333,rs72994757	0	AFR;EAS;EUR
chr2	241123757	240184340	rs7602725	chr2_22	rs10166264,rs59043333,rs72994757	0	AFR;EAS;EUR
chr2	241123808	240184391	rs7587174	chr2_22	rs10166264,rs59043333,rs72994757	0	EAS;EUR
chr2	241123837	240184420	rs7597638	chr2_22	rs10166264,rs59043333,rs72994757	0	AFR;EAS;EUR
chr2	241123845	240184428	rs72994757	chr2_22	rs10166264,rs59043333,rs72994757	1	AFR;EAS;EUR
chr2	241123862	240184445	rs7606242	chr2_22	rs10166264,rs59043333,rs72994757	0	AFR;EAS;EUR
chr2	241124031	240184614	rs7590068	chr2_22	rs10166264,rs59043333,rs72994757	0	AFR;EAS;EUR
chr2	241124189	240184772	rs7590209	chr2_22	rs10166264,rs59043333,rs72994757	0	AFR;EAS;EUR
chr2	241124330	240184913	rs34819611	chr2_22	rs10166264,rs59043333,rs72994757	0	AFR;EAS;EUR
chr2	241124461	240185044	rs36006357	chr2_22	rs10166264,rs59043333,rs72994757	0	EUR
chr2	241124517	240185100	rs35167493	chr2_22	rs10166264,rs59043333,rs72994757	0	AFR;EAS;EUR
chr2	241124641	240185224	rs34450038	chr2_22	rs10166264,rs59043333,rs72994757	0	AFR;EAS;EUR
chr2	241124668	240185251	rs35283606	chr2_22	rs10166264,rs59043333,rs72994757	0	AFR;EAS;EUR
chr2	241124728	240185311	rs11896505	chr2_22	rs10166264,rs59043333,rs72994757	0	EAS
chr2	241124732	240185315	rs201778420	chr2_22	rs10166264,rs59043333,rs72994757	0	AFR;EAS;EUR
chr2	241124782	240185365	rs79748726	chr2_22	rs10166264,rs59043333,rs72994757	0	AFR;EAS;EUR
chr2	241125015	240185598	rs72996731	chr2_22	rs10166264,rs59043333,rs72994757	0	AFR;EAS;EUR
chr2	241125027	240185610	rs67681833	chr2_22	rs10166264,rs59043333,rs72994757	0	AFR;EAS;EUR
chr2	241125087	240185670	rs62184682	chr2_22	rs10166264,rs59043333,rs72994757	0	AFR;EAS;EUR
chr2	241125273	240185856	rs62184683	chr2_22	rs10166264,rs59043333,rs72994757	0	AFR
chr2	241125352	240185935	rs62184688	chr2_22	rs10166264,rs59043333,rs72994757	0	AFR;EAS;EUR
chr2	241125384	240185967	rs62184735	chr2_22	rs10166264,rs59043333,rs72994757	0	AFR;EAS;EUR
chr2	241125449	240186032	rs62184736	chr2_22	rs10166264,rs59043333,rs72994757	0	AFR;EAS;EUR
chr2	241125477	240186060	rs13421989	chr2_22	rs10166264,rs59043333,rs72994757	0	AFR;EAS;EUR
chr2	241125619	240186202	rs13422201	chr2_22	rs10166264,rs59043333,rs72994757	0	EAS;EUR
chr2	241125816	240186399	rs13430637	chr2_22	rs10166264,rs59043333,rs72994757	0	EAS;EUR
chr2	241126595	240187178	rs28573266	chr2_22	rs10166264,rs59043333,rs72994757	0	EUR
chr2	241126871	240187454	rs13415987	chr2_22	rs10166264,rs59043333,rs72994757	0	AFR
chr2	241126935	240187518	rs28581704	chr2_22	rs10166264,rs59043333,rs72994757	0	AFR
chr2	241127935	240188518	rs1908625	chr2_22	rs10166264,rs59043333,rs72994757	0	EUR
chr2	241128200	240188783	rs7567895	chr2_22	rs10166264,rs59043333,rs72994757	0	EUR
chr3	16408247	16366740	rs62236264	chr3_23	rs62236264,rs79691057	1	AFR;EAS;EUR
chr3	16408251	16366744	rs79691057	chr3_23	rs62236264,rs79691057	1	YRI
chr3	16408296	16366789	rs62236265	chr3_23	rs62236264,rs79691057	0	AFR;EAS;EUR
chr3	25353796	25312305	rs754975	chr3_24	rs1436251,rs9848513	0	EUR
chr3	25363332	25321841	rs11708300	chr3_24	rs1436251,rs9848513	0	AFR;EAS;EUR
chr3	25363620	25322129	rs9877461	chr3_24	rs1436251,rs9848513	0	EAS
chr3	25363943	25322452	rs9822411	chr3_24	rs1436251,rs9848513	0	EAS
chr3	25364176	25322685	rs11917967	chr3_24	rs1436251,rs9848513	0	AFR;EAS;EUR
chr3	25364233	25322742	rs76908521	chr3_24	rs1436251,rs9848513	0	EAS
chr3	25364289	25322798	rs17016187	chr3_24	rs1436251,rs9848513	0	EAS;EUR
chr3	25365011	25323520	rs2164476	chr3_24	rs1436251,rs9848513	0	EAS;EUR
chr3	25365275	25323784	rs76243897	chr3_24	rs1436251,rs9848513	0	EAS;EUR
chr3	25365286	25323795	rs77309070	chr3_24	rs1436251,rs9848513	0	EAS;EUR
chr3	25366205	25324714	rs1561116	chr3_24	rs1436251,rs9848513	0	EAS;EUR
chr3	25366405	25324914	rs1984597	chr3_24	rs1436251,rs9848513	0	AFR;EAS;EUR
chr3	25366733	25325242	rs9837851	chr3_24	rs1436251,rs9848513	0	AFR;EAS;EUR
chr3	25366887	25325396	rs9818293	chr3_24	rs1436251,rs9848513	0	AFR;EAS;EUR
chr3	25367141	25325650	rs17016204	chr3_24	rs1436251,rs9848513	0	EAS;EUR
chr3	25368355	25326864	rs57386420	chr3_24	rs1436251,rs9848513	0	EAS;EUR
chr3	25368723	25327232	rs59087853	chr3_24	rs1436251,rs9848513	0	EAS
chr3	25369060	25327569	rs9832914	chr3_24	rs1436251,rs9848513	0	EAS;EUR
chr3	25369348	25327857	rs9833653	chr3_24	rs1436251,rs9848513	0	EAS
chr3	25369694	25328203	rs6806988	chr3_24	rs1436251,rs9848513	0	EAS;EUR
chr3	25370042	25328551	rs6799057	chr3_24	rs1436251,rs9848513	0	EAS;EUR
chr3	25370623	25329132	rs138818958	chr3_24	rs1436251,rs9848513	0	EAS
chr3	25370880	25329389	rs144224197	chr3_24	rs1436251,rs9848513	0	EAS
chr3	25370895	25329404	rs9848967	chr3_24	rs1436251,rs9848513	0	EAS;EUR
chr3	25371094	25329603	rs115179237	chr3_24	rs1436251,rs9848513	0	EAS;EUR
chr3	25371185	25329694	rs9815892	chr3_24	rs1436251,rs9848513	0	EAS
chr3	25371602	25330111	rs116690425	chr3_24	rs1436251,rs9848513	0	EAS;EUR
chr3	25371612	25330121	rs9816521	chr3_24	rs1436251,rs9848513	0	EAS;EUR
chr3	25371675	25330184	rs11707346	chr3_24	rs1436251,rs9848513	0	EAS;EUR
chr3	25371735	25330244	rs6796134	chr3_24	rs1436251,rs9848513	0	EAS;EUR
chr3	25372202	25330711	rs141289671	chr3_24	rs1436251,rs9848513	0	EAS
chr3	25372361	25330870	rs6790649	chr3_24	rs1436251,rs9848513	0	AFR;EAS;EUR
chr3	25372672	25331181	rs6788260	chr3_24	rs1436251,rs9848513	0	EAS;EUR
chr3	25372833	25331342	rs144545423	chr3_24	rs1436251,rs9848513	0	EAS
chr3	25373027	25331536	rs146987328	chr3_24	rs1436251,rs9848513	0	EAS
chr3	25373905	25332414	rs6792022	chr3_24	rs1436251,rs9848513	0	EAS
chr3	25373906	25332415	rs6794637	chr3_24	rs1436251,rs9848513	0	AFR;EAS;EUR
chr3	25374032	25332541	rs6781934	chr3_24	rs1436251,rs9848513	0	EAS;EUR
chr3	25374119	25332628	rs6794641	chr3_24	rs1436251,rs9848513	0	AFR;EAS;EUR
chr3	25374704	25333213	rs374581791	chr3_24	rs1436251,rs9848513	0	EAS
chr3	25374790	25333299	rs141172681	chr3_24	rs1436251,rs9848513	0	EAS
chr3	25375355	25333864	rs9874712	chr3_24	rs1436251,rs9848513	0	EAS
chr3	25375621	25334130	rs9837715	chr3_24	rs1436251,rs9848513	0	AFR;EAS;EUR
chr3	25375791	25334300	rs9837763	chr3_24	rs1436251,rs9848513	0	AFR;EAS;EUR
chr3	25376034	25334543	rs322686	chr3_24	rs1436251,rs9848513	0	EAS
chr3	25376101	25334610	rs9842356	chr3_24	rs1436251,rs9848513	0	AFR;EAS;EUR
chr3	25376537	25335046	rs1483837	chr3_24	rs1436251,rs9848513	0	AFR;EAS;EUR
chr3	25376753	25335262	rs375461074	chr3_24	rs1436251,rs9848513	0	EAS
chr3	25376758	25335267	rs200875881	chr3_24	rs1436251,rs9848513	0	EAS
chr3	25376779	25335288	rs11720675	chr3_24	rs1436251,rs9848513	0	EAS
chr3	25377424	25335933	rs1436251	chr3_24	rs1436251,rs9848513	1	AFR;EAS;EUR
chr3	25377589	25336098	rs9848513	chr3_24	rs1436251,rs9848513	1	AFR;EAS;EUR
chr3	25377637	25336146	rs78022710	chr3_24	rs1436251,rs9848513	0	EAS
chr3	25377760	25336269	rs1905465	chr3_24	rs1436251,rs9848513	0	AFR;EAS;EUR
chr3	25377786	25336295	rs7649070	chr3_24	rs1436251,rs9848513	0	EAS
chr3	25378486	25336995	rs6550961	chr3_24	rs1436251,rs9848513	0	EAS;EUR
chr3	25379134	25337643	rs6799363	chr3_24	rs1436251,rs9848513	0	EAS;EUR
chr3	25379231	25337740	rs6774199	chr3_24	rs1436251,rs9848513	0	EAS;EUR
chr3	25381352	25339861	rs74347859	chr3_24	rs1436251,rs9848513	0	EAS
chr3	25381964	25340473	rs6550962	chr3_24	rs1436251,rs9848513	0	EAS
chr3	25382068	25340577	rs6550963	chr3_24	rs1436251,rs9848513	0	EAS
chr3	25382692	25341201	rs79287399	chr3_24	rs1436251,rs9848513	0	EAS
chr3	25382817	25341326	rs77820862	chr3_24	rs1436251,rs9848513	0	EAS
chr3	25384139	25342648	rs57697446	chr3_24	rs1436251,rs9848513	0	EAS
chr3	25384947	25343456	rs141171552	chr3_24	rs1436251,rs9848513	0	EAS
chr3	25385111	25343620	rs7615094	chr3_24	rs1436251,rs9848513	0	EAS
chr3	25385415	25343924	rs7623030	chr3_24	rs1436251,rs9848513	0	EAS
chr3	25385649	25344158	rs7615609	chr3_24	rs1436251,rs9848513	0	EAS;EUR
chr3	25386018	25344527	rs11709169	chr3_24	rs1436251,rs9848513	0	EAS;EUR
chr3	25386325	25344834	rs11717848	chr3_24	rs1436251,rs9848513	0	EAS
chr3	25386592	25345101	rs6771956	chr3_24	rs1436251,rs9848513	0	EAS;EUR
chr3	25386646	25345155	rs11718046	chr3_24	rs1436251,rs9848513	0	EAS
chr3	25388856	25347365	rs6550966	chr3_24	rs1436251,rs9848513	0	EAS
chr3	25389504	25348013	rs11721271	chr3_24	rs1436251,rs9848513	0	EAS
chr3	25391348	25349857	rs11709732	chr3_24	rs1436251,rs9848513	0	EAS
chr3	25392580	25351089	rs17016260	chr3_24	rs1436251,rs9848513	0	EAS
chr3	25392772	25351281	rs11718836	chr3_24	rs1436251,rs9848513	0	EAS
chr3	25396865	25355374	rs17588596	chr3_24	rs1436251,rs9848513	0	EAS
chr3	25398513	25357022	rs7637182	chr3_24	rs1436251,rs9848513	0	EAS
chr3	25398881	25357390	rs142001230	chr3_24	rs1436251,rs9848513	0	EAS
chr3	25399881	25358390	rs114419609	chr3_24	rs1436251,rs9848513	0	EAS
chr3	25400006	25358515	rs140244335	chr3_24	rs1436251,rs9848513	0	EAS
chr3	25401099	25359608	rs59816658	chr3_24	rs1436251,rs9848513	0	EAS
chr3	25402082	25360591	rs116605026	chr3_24	rs1436251,rs9848513	0	EAS
chr3	25402974	25361483	rs11716202	chr3_24	rs1436251,rs9848513	0	EAS
chr3	25403207	25361716	rs11713396	chr3_24	rs1436251,rs9848513	0	EAS
chr3	36183871	36142379	rs13068500	chr3_25	rs13078784,rs79152277	0	EUR
chr3	36183906	36142414	rs7625562	chr3_25	rs13078784,rs79152277	0	EUR
chr3	36184294	36142802	rs11707761	chr3_25	rs13078784,rs79152277	0	EUR
chr3	36184784	36143292	rs34035718	chr3_25	rs13078784,rs79152277	0	EUR
chr3	36185822	36144330	rs34969751	chr3_25	rs13078784,rs79152277	0	EUR
chr3	36186173	36144681	rs9876218	chr3_25	rs13078784,rs79152277	0	EUR
chr3	36186775	36145283	rs35094663	chr3_25	rs13078784,rs79152277	0	EUR
chr3	36187154	36145662	rs1450002	chr3_25	rs13078784,rs79152277	0	EUR
chr3	36187485	36145993	rs78413294	chr3_25	rs13078784,rs79152277	0	EAS
chr3	36187527	36146035	rs12233377	chr3_25	rs13078784,rs79152277	0	EUR
chr3	36187623	36146131	rs6782320	chr3_25	rs13078784,rs79152277	0	EUR
chr3	36188048	36146556	rs11129698	chr3_25	rs13078784,rs79152277	0	EUR
chr3	36188668	36147176	rs150634302	chr3_25	rs13078784,rs79152277	0	EUR
chr3	36188723	36147231	rs71328131	chr3_25	rs13078784,rs79152277	0	EUR
chr3	36189216	36147724	rs4678850	chr3_25	rs13078784,rs79152277	0	EUR
chr3	36190154	36148662	rs13073797	chr3_25	rs13078784,rs79152277	0	EUR
chr3	36190206	36148714	rs13073648	chr3_25	rs13078784,rs79152277	0	EUR
chr3	36190651	36149159	rs4678851	chr3_25	rs13078784,rs79152277	0	EUR
chr3	36191257	36149765	rs188641086	chr3_25	rs13078784,rs79152277	0	EAS
chr3	36191258	36149766	rs193164265	chr3_25	rs13078784,rs79152277	0	EAS
chr3	36191585	36150093	rs6796271	chr3_25	rs13078784,rs79152277	0	EAS
chr3	36191945	36150453	rs61050332	chr3_25	rs13078784,rs79152277	0	EAS
chr3	36191952	36150460	rs10605706	chr3_25	rs13078784,rs79152277	0	EAS
chr3	36192113	36150621	rs17034462	chr3_25	rs13078784,rs79152277	0	EAS
chr3	36192176	36150684	rs1450004	chr3_25	rs13078784,rs79152277	0	EUR
chr3	36192494	36151002	rs7643538	chr3_25	rs13078784,rs79152277	0	EAS
chr3	36192557	36151065	rs7621380	chr3_25	rs13078784,rs79152277	0	EAS
chr3	36192621	36151129	rs7643634	chr3_25	rs13078784,rs79152277	0	EAS
chr3	36192735	36151243	rs57970818	chr3_25	rs13078784,rs79152277	0	EAS
chr3	36193066	36151574	rs10510677	chr3_25	rs13078784,rs79152277	0	EUR
chr3	36193319	36151827	rs59174768	chr3_25	rs13078784,rs79152277	0	EAS
chr3	36193326	36151834	rs57979041	chr3_25	rs13078784,rs79152277	0	EAS
chr3	36193366	36151874	rs72855287	chr3_25	rs13078784,rs79152277	0	EAS
chr3	36193391	36151899	rs35983287	chr3_25	rs13078784,rs79152277	0	EUR
chr3	36193437	36151945	rs72855288	chr3_25	rs13078784,rs79152277	0	EAS
chr3	36193466	36151974	rs74918479	chr3_25	rs13078784,rs79152277	0	EAS
chr3	36193523	36152031	rs60112870	chr3_25	rs13078784,rs79152277	0	EAS
chr3	36193594	36152102	rs57521975	chr3_25	rs13078784,rs79152277	0	EAS
chr3	36193948	36152456	rs57621776	chr3_25	rs13078784,rs79152277	0	EAS
chr3	36194024	36152532	rs60477592	chr3_25	rs13078784,rs79152277	0	EAS
chr3	36194025	36152533	rs11129699	chr3_25	rs13078784,rs79152277	0	EUR
chr3	36194102	36152610	rs60585957	chr3_25	rs13078784,rs79152277	0	EUR
chr3	36194167	36152675	rs1450005	chr3_25	rs13078784,rs79152277	0	EUR
chr3	36194240	36152748	rs5847912	chr3_25	rs13078784,rs79152277	0	EAS
chr3	36194248	36152756	rs5004875	chr3_25	rs13078784,rs79152277	0	EAS
chr3	36194257	36152765	rs2044767	chr3_25	rs13078784,rs79152277	0	EUR
chr3	36194379	36152887	rs2044768	chr3_25	rs13078784,rs79152277	0	EUR
chr3	36194506	36153014	rs2044769	chr3_25	rs13078784,rs79152277	0	EUR
chr3	36194819	36153327	rs72855292	chr3_25	rs13078784,rs79152277	0	EAS
chr3	36194854	36153362	rs60756716	chr3_25	rs13078784,rs79152277	0	EUR
chr3	36194889	36153397	rs72855293	chr3_25	rs13078784,rs79152277	0	EAS
chr3	36194941	36153449	rs75049176	chr3_25	rs13078784,rs79152277	0	EAS
chr3	36195391	36153899	rs79181617	chr3_25	rs13078784,rs79152277	0	EAS
chr3	36195608	36154116	rs72855297	chr3_25	rs13078784,rs79152277	0	EAS
chr3	36195625	36154133	rs375209939	chr3_25	rs13078784,rs79152277	0	EAS
chr3	36195641	36154149	rs112112586	chr3_25	rs13078784,rs79152277	0	EAS
chr3	36195646	36154154	rs58901475	chr3_25	rs13078784,rs79152277	0	EAS
chr3	36195699	36154207	rs59055941	chr3_25	rs13078784,rs79152277	0	EAS
chr3	36195725	36154233	rs60950198	chr3_25	rs13078784,rs79152277	0	EAS
chr3	36195736	36154244	rs56846201	chr3_25	rs13078784,rs79152277	0	EAS
chr3	36195762	36154270	rs58875185	chr3_25	rs13078784,rs79152277	0	EAS
chr3	36196172	36154680	rs78266009	chr3_25	rs13078784,rs79152277	0	EAS
chr3	36196282	36154790	rs11709343	chr3_25	rs13078784,rs79152277	0	EUR
chr3	36196290	36154798	rs1901023	chr3_25	rs13078784,rs79152277	0	AFR;EAS;EUR
chr3	36196302	36154810	rs1901024	chr3_25	rs13078784,rs79152277	0	AFR;EAS;EUR
chr3	36196549	36155057	rs72855301	chr3_25	rs13078784,rs79152277	0	EAS
chr3	36196717	36155225	rs201635032	chr3_25	rs13078784,rs79152277	0	EAS
chr3	36196720	36155228	rs3033978	chr3_25	rs13078784,rs79152277	0	EUR
chr3	36196864	36155372	rs7623921	chr3_25	rs13078784,rs79152277	0	AFR;EAS
chr3	36197020	36155528	rs74568781	chr3_25	rs13078784,rs79152277	0	EAS
chr3	36197196	36155704	rs2884850	chr3_25	rs13078784,rs79152277	0	AFR;EAS
chr3	36197239	36155747	rs2359969	chr3_25	rs13078784,rs79152277	0	AFR;EAS
chr3	36197277	36155785	rs2359970	chr3_25	rs13078784,rs79152277	0	AFR;EAS
chr3	36197391	36155899	rs2359972	chr3_25	rs13078784,rs79152277	0	AFR;EAS
chr3	36197435	36155943	rs2359973	chr3_25	rs13078784,rs79152277	0	AFR;EAS
chr3	36197565	36156073	rs34039253	chr3_25	rs13078784,rs79152277	0	EUR
chr3	36197670	36156178	rs4588309	chr3_25	rs13078784,rs79152277	0	AFR;EAS;EUR
chr3	36197769	36156277	rs34809257	chr3_25	rs13078784,rs79152277	0	AFR;EAS;EUR
chr3	36197831	36156339	rs79026972	chr3_25	rs13078784,rs79152277	0	AFR;EAS
chr3	36197875	36156383	rs77615505	chr3_25	rs13078784,rs79152277	0	AFR;EAS
chr3	36197913	36156421	rs34222592	chr3_25	rs13078784,rs79152277	0	EUR
chr3	36198316	36156824	rs76585663	chr3_25	rs13078784,rs79152277	0	EAS
chr3	36198356	36156864	rs77442064	chr3_25	rs13078784,rs79152277	0	AFR;EAS
chr3	36198528	36157036	rs74683700	chr3_25	rs13078784,rs79152277	0	AFR;EAS
chr3	36198853	36157361	rs80054200	chr3_25	rs13078784,rs79152277	0	AFR;EAS
chr3	36199515	36158023	rs6805153	chr3_25	rs13078784,rs79152277	0	AFR;EAS
chr3	36199718	36158226	rs1901025	chr3_25	rs13078784,rs79152277	0	EUR
chr3	36199726	36158234	rs1901026	chr3_25	rs13078784,rs79152277	0	AFR;EAS;EUR
chr3	36199792	36158300	rs201901393	chr3_25	rs13078784,rs79152277	0	AFR;EAS
chr3	36199796	36158304	rs1901027	chr3_25	rs13078784,rs79152277	0	EUR
chr3	36199823	36158331	rs1901028	chr3_25	rs13078784,rs79152277	0	EUR
chr3	36199891	36158399	rs74815970	chr3_25	rs13078784,rs79152277	0	AFR;EAS
chr3	36199963	36158471	rs79779857	chr3_25	rs13078784,rs79152277	0	AFR;EAS
chr3	36200113	36158621	rs74282005	chr3_25	rs13078784,rs79152277	0	AFR;EAS
chr3	36200382	36158890	rs77991091	chr3_25	rs13078784,rs79152277	0	AFR;EAS
chr3	36200394	36158902	rs17030138	chr3_25	rs13078784,rs79152277	0	EUR
chr3	36200504	36159012	rs17030140	chr3_25	rs13078784,rs79152277	0	AFR;EAS
chr3	36200543	36159051	rs78076899	chr3_25	rs13078784,rs79152277	0	AFR;EAS
chr3	36200971	36159479	rs1349291	chr3_25	rs13078784,rs79152277	0	AFR;EAS
chr3	36200989	36159497	rs1349292	chr3_25	rs13078784,rs79152277	0	AFR;EAS;EUR
chr3	36201060	36159568	rs1349293	chr3_25	rs13078784,rs79152277	0	AFR;EAS
chr3	36201554	36160062	rs6763672	chr3_25	rs13078784,rs79152277	0	AFR;EAS
chr3	36201741	36160249	rs6776529	chr3_25	rs13078784,rs79152277	0	AFR;EAS
chr3	36202076	36160584	rs74331222	chr3_25	rs13078784,rs79152277	0	AFR;EAS
chr3	36202180	36160688	rs76181324	chr3_25	rs13078784,rs79152277	0	AFR;EAS
chr3	36202195	36160703	rs78462038	chr3_25	rs13078784,rs79152277	0	AFR;EAS
chr3	36202205	36160713	rs76675470	chr3_25	rs13078784,rs79152277	0	AFR;EAS
chr3	36202274	36160782	rs147902680	chr3_25	rs13078784,rs79152277	0	AFR;EAS
chr3	36202535	36161043	rs78372182	chr3_25	rs13078784,rs79152277	0	AFR;EAS
chr3	36202828	36161336	rs74417760	chr3_25	rs13078784,rs79152277	0	AFR;EAS
chr3	36203228	36161736	rs138911432	chr3_25	rs13078784,rs79152277	0	AFR;EAS
chr3	36203515	36162023	rs75359630	chr3_25	rs13078784,rs79152277	0	AFR;EAS
chr3	36203695	36162203	rs76458172	chr3_25	rs13078784,rs79152277	0	AFR;EAS
chr3	36203708	36162216	rs74492959	chr3_25	rs13078784,rs79152277	0	AFR;EAS
chr3	36203767	36162275	rs76101930	chr3_25	rs13078784,rs79152277	0	AFR;EAS
chr3	36203985	36162493	rs80146468	chr3_25	rs13078784,rs79152277	0	AFR;EAS
chr3	36204061	36162569	rs1868595	chr3_25	rs13078784,rs79152277	0	AFR;EAS;EUR
chr3	36204316	36162824	rs13063735	chr3_25	rs13078784,rs79152277	0	EUR
chr3	36204391	36162899	rs79544248	chr3_25	rs13078784,rs79152277	0	AFR;EAS
chr3	36204463	36162971	rs13078784	chr3_25	rs13078784,rs79152277	1	AFR;EAS;EUR
chr3	36204536	36163044	rs79152277	chr3_25	rs13078784,rs79152277	1	AFR;EAS
chr3	36204717	36163225	rs77734649	chr3_25	rs13078784,rs79152277	0	AFR;EAS
chr3	36204755	36163263	rs78651340	chr3_25	rs13078784,rs79152277	0	AFR;EAS
chr3	36205003	36163511	rs35082872	chr3_25	rs13078784,rs79152277	0	EUR
chr3	36205124	36163632	rs78106117	chr3_25	rs13078784,rs79152277	0	AFR;EAS
chr3	36205299	36163807	rs76456205	chr3_25	rs13078784,rs79152277	0	AFR;EAS
chr3	36205348	36163856	rs949764	chr3_25	rs13078784,rs79152277	0	EUR
chr3	36205453	36163961	rs949763	chr3_25	rs13078784,rs79152277	0	EUR
chr3	36205504	36164012	rs79807281	chr3_25	rs13078784,rs79152277	0	AFR;EAS
chr3	36205522	36164030	rs949684	chr3_25	rs13078784,rs79152277	0	EUR
chr3	36205632	36164140	rs74364333	chr3_25	rs13078784,rs79152277	0	EAS
chr3	36205782	36164290	rs74994407	chr3_25	rs13078784,rs79152277	0	EAS
chr3	36205797	36164305	rs76056272	chr3_25	rs13078784,rs79152277	0	AFR;EAS
chr3	36205918	36164426	rs77177626	chr3_25	rs13078784,rs79152277	0	AFR;EAS
chr3	36205920	36164428	rs76128724	chr3_25	rs13078784,rs79152277	0	AFR;EAS
chr3	36206139	36164647	rs74443248	chr3_25	rs13078784,rs79152277	0	AFR;EAS
chr3	36206241	36164749	rs4678852	chr3_25	rs13078784,rs79152277	0	AFR;EAS;EUR
chr3	36206279	36164787	rs4678853	chr3_25	rs13078784,rs79152277	0	AFR;EAS;EUR
chr3	36206644	36165152	rs79296583	chr3_25	rs13078784,rs79152277	0	AFR;EAS
chr3	36206703	36165211	rs74282007	chr3_25	rs13078784,rs79152277	0	AFR;EAS
chr3	36206746	36165254	rs77753985	chr3_25	rs13078784,rs79152277	0	AFR;EAS
chr3	36206835	36165343	rs76141692	chr3_25	rs13078784,rs79152277	0	EAS
chr3	36206852	36165360	rs79126462	chr3_25	rs13078784,rs79152277	0	AFR;EAS
chr3	36206874	36165382	rs77704564	chr3_25	rs13078784,rs79152277	0	AFR;EAS
chr3	36207006	36165514	rs77900613	chr3_25	rs13078784,rs79152277	0	EAS
chr3	36207007	36165515	rs1450006	chr3_25	rs13078784,rs79152277	0	AFR;EAS;EUR
chr3	36207008	36165516	rs1450007	chr3_25	rs13078784,rs79152277	0	EUR
chr3	36207167	36165675	rs79207404	chr3_25	rs13078784,rs79152277	0	AFR;EAS
chr3	36207316	36165824	rs75153212	chr3_25	rs13078784,rs79152277	0	AFR;EAS
chr3	36207481	36165989	rs74404329	chr3_25	rs13078784,rs79152277	0	AFR;EAS
chr3	36207546	36166054	rs79727638	chr3_25	rs13078784,rs79152277	0	AFR;EAS
chr3	36207840	36166348	rs77287438	chr3_25	rs13078784,rs79152277	0	AFR;EAS
chr3	36207852	36166360	rs78308914	chr3_25	rs13078784,rs79152277	0	AFR;EAS
chr3	36207942	36166450	rs35787092	chr3_25	rs13078784,rs79152277	0	EUR
chr3	36208045	36166553	rs79989939	chr3_25	rs13078784,rs79152277	0	EAS
chr3	36208091	36166599	rs75076021	chr3_25	rs13078784,rs79152277	0	AFR;EAS
chr3	36208113	36166621	rs75867335	chr3_25	rs13078784,rs79152277	0	AFR;EAS
chr3	36208119	36166627	rs76645709	chr3_25	rs13078784,rs79152277	0	AFR;EAS
chr3	36208162	36166670	rs13098317	chr3_25	rs13078784,rs79152277	0	AFR;EAS;EUR
chr3	36208286	36166794	rs74918224	chr3_25	rs13078784,rs79152277	0	AFR;EAS
chr3	36208351	36166859	rs11925214	chr3_25	rs13078784,rs79152277	0	AFR;EAS;EUR
chr3	36208473	36166981	rs75992473	chr3_25	rs13078784,rs79152277	0	AFR;EAS
chr3	36208542	36167050	rs11925993	chr3_25	rs13078784,rs79152277	0	EUR
chr3	36208543	36167051	rs11925994	chr3_25	rs13078784,rs79152277	0	EUR
chr3	36208631	36167139	rs34223664	chr3_25	rs13078784,rs79152277	0	EUR
chr3	36208692	36167200	rs1868596	chr3_25	rs13078784,rs79152277	0	EUR
chr3	36208731	36167239	rs74789786	chr3_25	rs13078784,rs79152277	0	AFR;EAS
chr3	36208856	36167364	rs1868597	chr3_25	rs13078784,rs79152277	0	AFR;EAS;EUR
chr3	36209121	36167629	rs79378031	chr3_25	rs13078784,rs79152277	0	AFR;EAS
chr3	36209158	36167666	rs1868598	chr3_25	rs13078784,rs79152277	0	EUR
chr3	36209272	36167780	rs77343356	chr3_25	rs13078784,rs79152277	0	AFR;EAS
chr3	36209370	36167878	rs78255225	chr3_25	rs13078784,rs79152277	0	AFR;EAS
chr3	36209516	36168024	rs75810921	chr3_25	rs13078784,rs79152277	0	AFR;EAS
chr3	36209564	36168072	rs62243974	chr3_25	rs13078784,rs79152277	0	AFR;EAS;EUR
chr3	36209575	36168083	rs72868771	chr3_25	rs13078784,rs79152277	0	EUR
chr3	36209577	36168085	rs67775021	chr3_25	rs13078784,rs79152277	0	EUR
chr3	36209629	36168137	rs34147932	chr3_25	rs13078784,rs79152277	0	EUR
chr3	36209666	36168174	rs67135749	chr3_25	rs13078784,rs79152277	0	AFR;EAS;EUR
chr3	36209717	36168225	rs67847077	chr3_25	rs13078784,rs79152277	0	AFR;EAS;EUR
chr3	36209735	36168243	rs373444383	chr3_25	rs13078784,rs79152277	0	AFR;EAS
chr3	36209784	36168292	rs186936447	chr3_25	rs13078784,rs79152277	0	AFR;EAS
chr3	36209842	36168350	rs191347643	chr3_25	rs13078784,rs79152277	0	AFR;EAS
chr3	36209874	36168382	rs151094714	chr3_25	rs13078784,rs79152277	0	AFR;EAS;EUR
chr3	36210611	36169119	rs7622743	chr3_25	rs13078784,rs79152277	0	EUR
chr3	36210707	36169215	rs370483109	chr3_25	rs13078784,rs79152277	0	EAS
chr3	36210745	36169253	rs7644724	chr3_25	rs13078784,rs79152277	0	AFR;EAS;EUR
chr3	36210841	36169349	rs7644828	chr3_25	rs13078784,rs79152277	0	EUR
chr3	36210935	36169443	rs7634584	chr3_25	rs13078784,rs79152277	0	EUR
chr3	36211040	36169548	rs75956075	chr3_25	rs13078784,rs79152277	0	AFR;EAS
chr3	36211104	36169612	rs199674719	chr3_25	rs13078784,rs79152277	0	AFR;EAS
chr3	36211110	36169618	rs7645120	chr3_25	rs13078784,rs79152277	0	EUR
chr3	36211198	36169706	rs13093775	chr3_25	rs13078784,rs79152277	0	EUR
chr3	36211215	36169723	rs13093783	chr3_25	rs13078784,rs79152277	0	EUR
chr3	36211280	36169788	rs34264993	chr3_25	rs13078784,rs79152277	0	AFR;EAS;EUR
chr3	36211295	36169803	rs35581048	chr3_25	rs13078784,rs79152277	0	AFR;EAS;EUR
chr3	36211343	36169851	rs7623430	chr3_25	rs13078784,rs79152277	0	EUR
chr3	36211354	36169862	rs76939804	chr3_25	rs13078784,rs79152277	0	AFR;EAS
chr3	36211429	36169937	rs74565484	chr3_25	rs13078784,rs79152277	0	AFR;EAS
chr3	36211470	36169978	rs75574352	chr3_25	rs13078784,rs79152277	0	AFR;EAS
chr3	36211523	36170031	rs11720944	chr3_25	rs13078784,rs79152277	0	AFR;EAS;EUR
chr3	36211670	36170178	rs77190977	chr3_25	rs13078784,rs79152277	0	AFR;EAS
chr3	36211770	36170278	rs78606154	chr3_25	rs13078784,rs79152277	0	EAS
chr3	36212224	36170732	rs150548073	chr3_25	rs13078784,rs79152277	0	AFR;EAS
chr3	36212233	36170741	rs139456685	chr3_25	rs13078784,rs79152277	0	AFR;EAS
chr3	36212302	36170810	rs143120626	chr3_25	rs13078784,rs79152277	0	AFR;EAS
chr3	36212352	36170860	rs189965709	chr3_25	rs13078784,rs79152277	0	AFR;EAS
chr3	36212357	36170865	rs35858783	chr3_25	rs13078784,rs79152277	0	AFR;EAS;EUR
chr3	36212445	36170953	rs34891548	chr3_25	rs13078784,rs79152277	0	AFR;EAS;EUR
chr3	36212452	36170960	rs9831489	chr3_25	rs13078784,rs79152277	0	EUR
chr3	36212748	36171256	rs76738618	chr3_25	rs13078784,rs79152277	0	AFR;EAS
chr3	36212754	36171262	rs80266836	chr3_25	rs13078784,rs79152277	0	AFR;EAS
chr3	36212802	36171310	rs75620486	chr3_25	rs13078784,rs79152277	0	AFR;EAS
chr3	36212844	36171352	rs34867906	chr3_25	rs13078784,rs79152277	0	AFR;EAS;EUR
chr3	36212897	36171405	rs79026367	chr3_25	rs13078784,rs79152277	0	AFR;EAS
chr3	36212961	36171469	rs77613826	chr3_25	rs13078784,rs79152277	0	EAS
chr3	36213225	36171733	rs78492885	chr3_25	rs13078784,rs79152277	0	AFR;EAS
chr3	36213308	36171816	rs7629613	chr3_25	rs13078784,rs79152277	0	EUR
chr3	36213325	36171833	rs7641114	chr3_25	rs13078784,rs79152277	0	AFR;EAS;EUR
chr3	36213397	36171905	rs4435578	chr3_25	rs13078784,rs79152277	0	EUR
chr3	36213416	36171924	rs1901029	chr3_25	rs13078784,rs79152277	0	EUR
chr3	36213556	36172064	rs76305122	chr3_25	rs13078784,rs79152277	0	AFR;EAS
chr3	36213692	36172200	rs1901030	chr3_25	rs13078784,rs79152277	0	EUR
chr3	36213908	36172416	rs4592977	chr3_25	rs13078784,rs79152277	0	AFR;EAS
chr3	36214102	36172610	rs1450009	chr3_25	rs13078784,rs79152277	0	EUR
chr3	36214103	36172611	rs4552304	chr3_25	rs13078784,rs79152277	0	AFR;EAS
chr3	36214104	36172612	rs4426634	chr3_25	rs13078784,rs79152277	0	AFR;EAS
chr3	36214152	36172660	rs4440078	chr3_25	rs13078784,rs79152277	0	AFR;EAS
chr3	36214197	36172705	rs1450010	chr3_25	rs13078784,rs79152277	0	AFR;EAS;EUR
chr3	36214217	36172725	rs4428130	chr3_25	rs13078784,rs79152277	0	AFR;EAS
chr3	36214306	36172814	rs74967267	chr3_25	rs13078784,rs79152277	0	AFR;EAS
chr3	36214330	36172838	rs79581819	chr3_25	rs13078784,rs79152277	0	EAS
chr3	36214365	36172873	rs1450011	chr3_25	rs13078784,rs79152277	0	EUR
chr3	36214483	36172991	rs78073082	chr3_25	rs13078784,rs79152277	0	AFR;EAS
chr3	36214601	36173109	rs4678854	chr3_25	rs13078784,rs79152277	0	AFR;EAS;EUR
chr3	36214746	36173254	rs7635367	chr3_25	rs13078784,rs79152277	0	EUR
chr3	36214751	36173259	rs7646931	chr3_25	rs13078784,rs79152277	0	EUR
chr3	36215009	36173517	rs7647206	chr3_25	rs13078784,rs79152277	0	EUR
chr3	36215066	36173574	rs76932832	chr3_25	rs13078784,rs79152277	0	AFR;EAS
chr3	36215092	36173600	rs76432700	chr3_25	rs13078784,rs79152277	0	AFR;EAS
chr3	36215144	36173652	rs75387265	chr3_25	rs13078784,rs79152277	0	AFR;EAS
chr3	36215308	36173816	rs79847791	chr3_25	rs13078784,rs79152277	0	AFR;EAS
chr3	36215384	36173892	rs10433544	chr3_25	rs13078784,rs79152277	0	AFR;EAS;EUR
chr3	36215426	36173934	rs373427652	chr3_25	rs13078784,rs79152277	0	AFR;EAS
chr3	36215839	36174347	rs188793214	chr3_25	rs13078784,rs79152277	0	EAS
chr3	36216125	36174633	rs11719658	chr3_25	rs13078784,rs79152277	0	EUR
chr3	36216154	36174662	rs11708124	chr3_25	rs13078784,rs79152277	0	EUR
chr3	36216157	36174665	rs11719589	chr3_25	rs13078784,rs79152277	0	AFR;EAS;EUR
chr3	36216391	36174899	rs76478670	chr3_25	rs13078784,rs79152277	0	AFR;EAS
chr3	36217995	36176503	rs75475346	chr3_25	rs13078784,rs79152277	0	EAS
chr3	36218412	36176920	rs79952754	chr3_25	rs13078784,rs79152277	0	EAS
chr3	36218694	36177202	rs1450012	chr3_25	rs13078784,rs79152277	0	EAS
chr3	36219069	36177577	rs80018291	chr3_25	rs13078784,rs79152277	0	EAS
chr3	36219250	36177758	rs76949678	chr3_25	rs13078784,rs79152277	0	EAS
chr3	36219251	36177759	rs75964315	chr3_25	rs13078784,rs79152277	0	EAS
chr3	36220074	36178582	rs78649752	chr3_25	rs13078784,rs79152277	0	EAS
chr3	36220364	36178872	rs79570400	chr3_25	rs13078784,rs79152277	0	EAS
chr3	36220911	36179419	rs78105187	chr3_25	rs13078784,rs79152277	0	EAS
chr3	36221180	36179688	rs77327836	chr3_25	rs13078784,rs79152277	0	EAS
chr3	36221726	36180234	rs78937463	chr3_25	rs13078784,rs79152277	0	EAS
chr3	36222100	36180608	rs76587692	chr3_25	rs13078784,rs79152277	0	EAS
chr3	36223199	36181707	rs78075338	chr3_25	rs13078784,rs79152277	0	EAS
chr3	36223948	36182456	rs76031906	chr3_25	rs13078784,rs79152277	0	EAS
chr3	36224547	36183055	rs74442489	chr3_25	rs13078784,rs79152277	0	EAS
chr3	36225059	36183567	rs74823878	chr3_25	rs13078784,rs79152277	0	EAS
chr3	36226193	36184701	rs145487476	chr3_25	rs13078784,rs79152277	0	EAS
chr3	36226469	36184977	rs79426387	chr3_25	rs13078784,rs79152277	0	EAS
chr3	36226705	36185213	rs77703063	chr3_25	rs13078784,rs79152277	0	EAS
chr3	36226785	36185293	rs17034543	chr3_25	rs13078784,rs79152277	0	EAS
chr3	36227081	36185589	rs79206432	chr3_25	rs13078784,rs79152277	0	EAS
chr3	36227988	36186496	rs147289485	chr3_25	rs13078784,rs79152277	0	EAS
chr3	36228335	36186843	rs80299505	chr3_25	rs13078784,rs79152277	0	EAS
chr3	36228555	36187063	rs111706900	chr3_25	rs13078784,rs79152277	0	EAS
chr3	36228574	36187082	rs114441240	chr3_25	rs13078784,rs79152277	0	EAS
chr3	36228869	36187377	rs112525366	chr3_25	rs13078784,rs79152277	0	EAS
chr3	36229032	36187540	rs149689838	chr3_25	rs13078784,rs79152277	0	EAS
chr3	36229137	36187645	rs112041008	chr3_25	rs13078784,rs79152277	0	EAS
chr3	36229429	36187937	rs78640768	chr3_25	rs13078784,rs79152277	0	EAS
chr3	36229801	36188309	rs200979772	chr3_25	rs13078784,rs79152277	0	EAS
chr3	36230469	36188977	rs116911421	chr3_25	rs13078784,rs79152277	0	EAS
chr3	36231178	36189686	rs111615737	chr3_25	rs13078784,rs79152277	0	EAS
chr3	36231695	36190203	rs111629490	chr3_25	rs13078784,rs79152277	0	EAS
chr3	36234304	36192812	rs77706636	chr3_25	rs13078784,rs79152277	0	EAS
chr3	36234942	36193450	rs76100944	chr3_25	rs13078784,rs79152277	0	EAS
chr3	36235104	36193612	rs79051597	chr3_25	rs13078784,rs79152277	0	EAS
chr3	36235183	36193691	rs77342447	chr3_25	rs13078784,rs79152277	0	EAS
chr3	36235386	36193894	rs78255451	chr3_25	rs13078784,rs79152277	0	EAS
chr3	36235832	36194340	rs79171077	chr3_25	rs13078784,rs79152277	0	EAS
chr3	36235908	36194416	rs77735137	chr3_25	rs13078784,rs79152277	0	EAS
chr3	36235996	36194504	rs79197838	chr3_25	rs13078784,rs79152277	0	EAS
chr3	36236013	36194521	rs77077806	chr3_25	rs13078784,rs79152277	0	EAS
chr3	36236436	36194944	rs17034564	chr3_25	rs13078784,rs79152277	0	EAS
chr3	36236889	36195397	rs76459696	chr3_25	rs13078784,rs79152277	0	EAS
chr3	36237416	36195924	rs76957663	chr3_25	rs13078784,rs79152277	0	EAS
chr3	36238008	36196516	rs74565511	chr3_25	rs13078784,rs79152277	0	EAS
chr3	36238047	36196555	rs75149233	chr3_25	rs13078784,rs79152277	0	EAS
chr3	36238434	36196942	rs76681815	chr3_25	rs13078784,rs79152277	0	EAS
chr3	36239215	36197723	rs79879626	chr3_25	rs13078784,rs79152277	0	EAS
chr3	36239487	36197995	rs77250431	chr3_25	rs13078784,rs79152277	0	EAS
chr3	36240387	36198895	rs78740845	chr3_25	rs13078784,rs79152277	0	EAS
chr3	36240822	36199330	rs79025450	chr3_25	rs13078784,rs79152277	0	EAS
chr3	36240891	36199399	rs77613983	chr3_25	rs13078784,rs79152277	0	EAS
chr3	36240985	36199493	rs368639713	chr3_25	rs13078784,rs79152277	0	EAS
chr3	36241210	36199718	rs144720692	chr3_25	rs13078784,rs79152277	0	EAS
chr3	36241738	36200246	rs17034579	chr3_25	rs13078784,rs79152277	0	EAS
chr3	36242747	36201255	rs80051809	chr3_25	rs13078784,rs79152277	0	EAS
chr3	36243007	36201515	rs74703614	chr3_25	rs13078784,rs79152277	0	EAS
chr3	36243919	36202427	rs78664429	chr3_25	rs13078784,rs79152277	0	EAS
chr3	36244229	36202737	rs76513241	chr3_25	rs13078784,rs79152277	0	EAS
chr3	36244370	36202878	rs74814843	chr3_25	rs13078784,rs79152277	0	EAS
chr3	36244704	36203212	rs75867833	chr3_25	rs13078784,rs79152277	0	EAS
chr3	36245110	36203618	rs76290463	chr3_25	rs13078784,rs79152277	0	EAS
chr3	36245416	36203924	rs77945344	chr3_25	rs13078784,rs79152277	0	EAS
chr3	36247393	36205901	rs80248904	chr3_25	rs13078784,rs79152277	0	EAS
chr3	36247516	36206024	rs75559804	chr3_25	rs13078784,rs79152277	0	EAS
chr3	36248215	36206723	rs17034590	chr3_25	rs13078784,rs79152277	0	EAS
chr3	36248325	36206833	rs79617714	chr3_25	rs13078784,rs79152277	0	EAS
chr3	36250385	36208893	rs74318551	chr3_25	rs13078784,rs79152277	0	EAS
chr3	36253253	36211761	rs77485632	chr3_25	rs13078784,rs79152277	0	EAS
chr3	36254376	36212884	rs75358781	chr3_25	rs13078784,rs79152277	0	EAS
chr3	36254938	36213446	rs76476008	chr3_25	rs13078784,rs79152277	0	EAS
chr3	36255071	36213579	rs72496987	chr3_25	rs13078784,rs79152277	0	EAS
chr3	36255131	36213639	rs72496988	chr3_25	rs13078784,rs79152277	0	EAS
chr3	36255187	36213695	rs72496989	chr3_25	rs13078784,rs79152277	0	EAS
chr3	36255227	36213735	rs74954681	chr3_25	rs13078784,rs79152277	0	EAS
chr3	36255417	36213925	rs77254208	chr3_25	rs13078784,rs79152277	0	EAS
chr3	36255838	36214346	rs72496990	chr3_25	rs13078784,rs79152277	0	EAS
chr3	36256261	36214769	rs77002830	chr3_25	rs13078784,rs79152277	0	EAS
chr3	36258358	36216866	rs138554242	chr3_25	rs13078784,rs79152277	0	EAS
chr3	36258844	36217352	rs74190506	chr3_25	rs13078784,rs79152277	0	EAS
chr3	36260790	36219298	rs77040253	chr3_25	rs13078784,rs79152277	0	EAS
chr3	36260965	36219473	rs10510681	chr3_25	rs13078784,rs79152277	0	EAS
chr3	36261661	36220169	rs78738360	chr3_25	rs13078784,rs79152277	0	EAS
chr3	36261889	36220397	rs80341484	chr3_25	rs13078784,rs79152277	0	EAS
chr3	36262717	36221225	rs17034634	chr3_25	rs13078784,rs79152277	0	EAS
chr3	36263437	36221945	rs74989690	chr3_25	rs13078784,rs79152277	0	EAS
chr3	36269039	36227547	rs77797282	chr3_25	rs13078784,rs79152277	0	EAS
chr3	36269554	36228062	rs79714386	chr3_25	rs13078784,rs79152277	0	EAS
chr3	36270627	36229135	rs74282012	chr3_25	rs13078784,rs79152277	0	EAS
chr3	36270822	36229330	rs76540886	chr3_25	rs13078784,rs79152277	0	EAS
chr3	36274380	36232888	rs73830913	chr3_25	rs13078784,rs79152277	0	EAS
chr3	36274798	36233306	rs6802969	chr3_25	rs13078784,rs79152277	0	EAS
chr3	36275283	36233791	rs6790769	chr3_25	rs13078784,rs79152277	0	EAS
chr3	36275513	36234021	rs60245503	chr3_25	rs13078784,rs79152277	0	EAS
[truncated: 8,261 more rows]

## Sheet: STable7
STable7. Beta2Std (Siewert20) threshold 2.0 and NCD (Bitarello18) support
CHR	START_hg38	END_hg38	REGION	Max B2Std TSP (Eurasia)	Max B2Std Expanded (Eurasia)	Bitarello18 TSP	Bitarello18 LD	Support by Siewert20 or Bitarello18
chr1	29561376	29599176	chr1_1	NA	1.07441	NA	NA	TRUE
chr1	33964219	34009543	chr1_2	0.7899	5.38889	NA	NA	TRUE
chr1	71660701	71687651	chr1_3	3.82691	3.82691	NA	NA	TRUE
chr1	157734835	157764229	chr1_4	NA	1.94964	NA	NA	FALSE
chr1	172641209	172657003	chr1_5	NA	NA	NA	NA	FALSE
chr1	179277899	179341178	chr1_6	NA	NA	NA	TSI	TRUE
chr1	205439276	205447749	chr1_7	1.8648	5.24506	NA	NA	TRUE
chr1	237631974	237634152	chr1_8	2.36076	3.09727	NA	NA	TRUE
chr2	10240724	10254526	chr2_9	2.9893	4.11591	NA	NA	TRUE
chr2	64399797	64414667	chr2_10	5.1775	5.1775	NA	NA	TRUE
chr2	68800872	68807598	chr2_11	1.21453	3.81383	NA	NA	TRUE
chr2	77701028	77795127	chr2_12	2.25772	5.99904	NA	LWK;YRI	TRUE
chr2	83145074	83289656	chr2_13	0.683732	7.30435	NA	NA	TRUE
chr2	100659293	100666614	chr2_14	NA	NA	NA	NA	FALSE
chr2	123822956	123973422	chr2_15	1.82936	4.64283	NA	NA	TRUE
chr2	128590706	128661789	chr2_16	NA	NA	NA	LWK	TRUE
chr2	167784243	167813966	chr2_17	5.67481	6.88952	TSI;LWK;YRI	LWK;TSI;YRI	TRUE
chr2	198633448	198723537	chr2_18	5.56844	6.21217	NA	NA	TRUE
chr2	213256309	213702680	chr2_19	1.27106	9.27602	NA	NA	TRUE
chr2	221233397	221274716	chr2_20	1.68766	2.16545	NA	NA	TRUE
chr2	236611817	236632483	chr2_21	3.02249	6.86121	NA	NA	TRUE
chr2	240174034	240188783	chr2_22	5.11152	8.01321	GBR;TSI;LWK;YRI	GBR;LWK;TSI;YRI	TRUE
chr3	16366739	16366789	chr3_23	NA	NA	NA	NA	FALSE
chr3	25312304	25361716	chr3_24	4.06837	7.5462	NA	NA	TRUE
chr3	36142378	36264258	chr3_25	2.90482	6.52297	NA	GBR;TSI;YRI	TRUE
chr3	65624610	65638902	chr3_26	7.61015	9.86827	NA	NA	TRUE
chr3	116735222	116735846	chr3_27	-0.895496	-0.671499	NA	NA	FALSE
chr3	143917578	144021887	chr3_28	6.59084	8.80735	GBR;TSI;LWK;YRI	GBR;LWK;TSI;YRI	TRUE
chr3	177595087	177627338	chr3_29	3.47649	3.89643	NA	NA	TRUE
chr3	180328265	180598891	chr3_30	-0.816933	5.20133	NA	NA	TRUE
chr4	17466297	17508458	chr4_31	4.5465	6.71582	NA	NA	TRUE
chr4	27270225	27302923	chr4_32	-0.765022	1.62387	NA	NA	FALSE
chr4	33310920	33377121	chr4_33	2.94173	7.68362	NA	NA	TRUE
chr4	55270461	55312945	chr4_34	6.23725	8.82624	LWK;YRI	LWK;YRI	TRUE
chr4	57051969	57052326	chr4_35	5.97951	5.97951	GBR;TSI;LWK;YRI	GBR;LWK;TSI;YRI	TRUE
chr4	57051765	57068899	chr4_36	7.90206	8.95575	GBR;TSI;LWK;YRI	GBR;LWK;TSI;YRI	TRUE
chr4	69566969	69610870	chr4_37	NA	4.02467	NA	NA	TRUE
chr4	83633428	83682590	chr4_38	-0.854317	5.49143	NA	NA	TRUE
chr4	143673137	144101280	chr4_39	12.0176	13.0355	GBR;TSI;LWK;YRI	GBR;LWK;TSI;YRI	TRUE
chr4	179538826	179588114	chr4_40	NA	NA	NA	GBR;LWK;TSI	TRUE
chr5	3881628	3882722	chr5_41	NA	NA	NA	NA	FALSE
chr5	5071628	5113351	chr5_42	-0.517477	1.36584	NA	LWK;YRI	TRUE
chr5	8012497	8044845	chr5_43	9.90425	10.0101	GBR;TSI;LWK;YRI	GBR;LWK;TSI;YRI	TRUE
chr5	57660036	57777328	chr5_44	1.29083	3.03658	NA	NA	TRUE
chr5	75789410	75850528	chr5_45	-0.339939	2.77743	NA	NA	TRUE
chr5	128892813	128995030	chr5_46	3.59779	5.83274	NA	GBR;LWK;TSI;YRI	TRUE
chr5	129225130	129357336	chr5_47	NA	2.45981	NA	NA	TRUE
chr5	145939090	146018526	chr5_48	5.24503	6.58354	NA	NA	TRUE
chr6	1481841	1492223	chr6_49	2.01402	2.01402	NA	NA	TRUE
chr6	4395514	4471401	chr6_50	1.08383	5.73579	GBR	GBR;LWK;TSI	TRUE
chr6	40765386	40794698	chr6_51	0.078644	1.36261	NA	NA	FALSE
chr6	86840147	86936432	chr6_52	3.00289	7.45673	NA	NA	TRUE
chr6	167301854	167304957	chr6_53	2.09484	3.97181	NA	NA	TRUE
chr7	45211693	45235018	chr7_54	3.11568	5.19766	GBR;TSI;LWK;YRI	GBR;LWK;TSI;YRI	TRUE
chr7	47759824	47771948	chr7_55	8.5195	10.1506	GBR;TSI;LWK;YRI	GBR;LWK;TSI;YRI	TRUE
chr7	49594853	49634408	chr7_56	7.89401	11.0233	TSI;YRI	TSI;YRI	TRUE
chr7	82405317	82463073	chr7_57	-1.85622	2.42619	NA	NA	TRUE
chr7	108398329	108428315	chr7_58	NA	NA	NA	LWK;YRI	TRUE
chr7	117693673	117766184	chr7_59	4.20103	11.417	NA	NA	TRUE
chr7	155255556	155261393	chr7_60	NA	NA	NA	NA	FALSE
chr8	31514089	31588890	chr8_61	4.05401	8.35557	NA	NA	TRUE
chr8	32873472	32980776	chr8_62	-2.82821	1.11944	NA	NA	FALSE
chr8	71622788	71629231	chr8_63	4.38485	6.27683	NA	NA	TRUE
chr8	75530058	75652170	chr8_64	2.15143	5.99337	NA	NA	TRUE
chr8	82118661	82302842	chr8_65	NA	1.37559	NA	NA	FALSE
chr8	114577141	114832140	chr8_66	1.8647	3.4624	NA	NA	TRUE
chr8	119074007	119195782	chr8_67	2.02981	4.94186	NA	NA	TRUE
chr8	133375377	133425706	chr8_68	6.83584	7.55607	NA	NA	TRUE
chr9	75368532	75726099	chr9_69	-0.279955	1.52706	NA	GBR;TSI	TRUE
chr9	90772336	90825306	chr9_70	3.31845	5.3579	YRI	YRI	TRUE
chr9	96739273	97027031	chr9_71	NA	9.26505	NA	YRI	TRUE
chr9	101035311	101101898	chr9_72	2.53257	4.62249	GBR;LWK;YRI	GBR;LWK;YRI	TRUE
chr9	120135947	120143426	chr9_73	NA	NA	NA	NA	FALSE
chr9	121925808	121974566	chr9_74	3.81064	10.6584	YRI	YRI	TRUE
chr10	11627269	11649772	chr10_75	0.638014	6.29299	NA	NA	TRUE
chr10	43904259	44022519	chr10_76	0.422427	3.69461	NA	NA	TRUE
chr10	44650004	44751970	chr10_77	4.59953	13.0963	NA	GBR;LWK	TRUE
chr10	108599152	108636255	chr10_78	1.62341	4.72954	NA	TSI	TRUE
chr10	117263678	117397438	chr10_79	2.20764	6.14666	NA	NA	TRUE
chr10	122661440	122670287	chr10_80	NA	NA	NA	GBR;LWK;TSI;YRI	TRUE
chr11	6484040	6542816	chr11_81	0.378915	7.7747	NA	NA	TRUE
chr11	20545101	20570079	chr11_82	3.43857	4.46074	NA	NA	TRUE
chr11	43988072	43998007	chr11_83	7.12646	7.12646	NA	NA	TRUE
chr11	71270066	71308034	chr11_84	NA	-0.235259	NA	NA	FALSE
chr11	81772779	81859503	chr11_85	1.55923	11.4846	NA	GBR;LWK;TSI;YRI	TRUE
chr11	98090588	98275931	chr11_86	-0.313466	8.09799	NA	GBR;LWK;TSI;YRI	TRUE
chr11	131631005	131685153	chr11_87	NA	11.6145	NA	NA	TRUE
chr11	134415198	134426049	chr11_88	2.11048	7.11191	NA	NA	TRUE
chr12	66899914	66926838	chr12_89	3.10464	8.69431	NA	NA	TRUE
chr12	75519059	75646015	chr12_90	3.8507	3.8507	NA	NA	TRUE
chr12	86548316	86695994	chr12_91	2.0809	7.08039	NA	NA	TRUE
chr12	128252083	128268184	chr12_92	0.327671	1.46126	NA	NA	FALSE
chr12	132601246	132624163	chr12_93	1.23493	1.85213	NA	NA	FALSE
chr13	29612984	29722387	chr13_94	0.877591	4.88638	NA	NA	TRUE
chr13	32145705	32172084	chr13_95	1.63661	2.04357	NA	NA	TRUE
chr13	46862967	46902823	chr13_96	0.728897	5.23815	NA	NA	TRUE
chr13	111600442	111665418	chr13_97	-0.94642	3.76392	NA	NA	TRUE
chr14	21797104	21859825	chr14_98	6.02793	8.43014	GBR;TSI	GBR;TSI	TRUE
chr14	76665783	76676807	chr14_99	NA	-1.36461	NA	NA	FALSE
chr14	83777994	83805014	chr14_100	1.07292	2.25042	NA	NA	TRUE
chr14	85670660	85723416	chr14_101	2.53087	10.0599	TSI	GBR;LWK;TSI;YRI	TRUE
chr14	88325958	88351680	chr14_102	4.07931	9.6765	NA	LWK;YRI	TRUE
chr15	92581480	92620986	chr15_103	2.4997	6.40367	NA	NA	TRUE
chr15	100496420	100497260	chr15_104	NA	NA	NA	NA	FALSE
chr16	889550	898303	chr16_105	5.69029	6.45559	NA	NA	TRUE
chr16	8403942	8407886	chr16_106	2.19885	2.19885	NA	NA	TRUE
chr16	19980815	20043254	chr16_107	0.803337	2.80372	NA	NA	TRUE
chr16	81137724	81140709	chr16_108	1.42633	1.92973	NA	NA	FALSE
chr17	11639895	11717553	chr17_109	NA	NA	NA	NA	FALSE
chr17	14727506	14740462	chr17_110	6.3407	6.3407	NA	NA	TRUE
chr17	43725672	43738918	chr17_111	0.218745	0.218745	NA	NA	FALSE
chr18	56982157	57023526	chr18_112	NA	NA	NA	NA	FALSE
chr18	59333448	59448140	chr18_113	1.50229	2.96637	NA	NA	TRUE
chr18	60702358	60866713	chr18_114	5.39683	14.424	NA	YRI	TRUE
chr19	8607756	8608976	chr19_115	0.514321	1.4618	NA	NA	FALSE
chr19	14399279	14438455	chr19_116	-1.15234	2.07623	NA	NA	TRUE
chr19	48119287	48178810	chr19_117	0.937281	1.52097	NA	NA	FALSE
chr20	5330969	5368467	chr20_118	9.16775	9.33132	NA	NA	TRUE
chr20	16685156	16719289	chr20_119	0.387693	0.387693	NA	NA	FALSE
chr20	53804072	53814566	chr20_120	-0.450877	2.71849	NA	NA	TRUE
chr20	62687652	62693871	chr20_121	-1.11447	1.31343	NA	NA	FALSE
chr21	20654338	20688974	chr21_122	3.85167	7.24467	TSI	TSI;YRI	TRUE
chr21	40659595	40684692	chr21_123	1.46027	6.38801	NA	NA	TRUE
chr22	44793357	44812463	chr22_124	2.18428	5.58399	NA	NA	TRUE
chr22	47220360	47256864	chr22_125	0.317691	6.09057	NA	NA	TRUE
